# Supplementary material for: Substituent-controlled regioselective arylation of carbazoles using dual catalysis
Source: Royal Society of Chemistry journal article supplement (doi:10.1039/d3ob01827j), 2023-12-20

## Steric and electronic control regioselectivity in arylation of carbazoles using dual catalysis

M. Shahid, Perumal Muthuraja, Purushothaman Gopinath,\*

### Table of contents

|      |                                                                                                   |         |
|------|---------------------------------------------------------------------------------------------------|---------|
| 1.0  | General information                                                                               | S2      |
| 2.0  | Optimization table and Experimental procedures                                                    | S2-S10  |
| 2.1  | General procedure for the synthesis of 9 <i>H</i> -carbazoles (1ah, 1ai, 1aj)                     | S2-S3   |
| 2.2  | General Procedure for synthesis of 9(pyrimidin-2-yl)-9 <i>H</i> -carbazoles (1f-1j)               | S3      |
| 2.3  | General procedure for the synthesis of (pyrimidin-2-yl)-9 <i>H</i> -carbazole derivatives (1b-1e) | S3-S4   |
| 2.4  | General procedure for the preparation of aryldiazonium tetrafluoroborates                         | S4      |
| 2.5  | General procedure for the <i>ortho</i> arylation of 9(pyrimidin-2-yl)-9 <i>H</i> -carbazoles      | S4-S6   |
| 2.6  | General procedure for diarylation of 9(pyrimidin-2-yl)-9 <i>H</i> -carbazoles                     | S6      |
| 2.7  | Gram scale procedure for monoarylation of 9(Pyrimidin-2-yl)-9 <i>H</i> -carbazoles, (3a)          | S6-S7   |
| 2.8  | Gram scale procedure for diarylation of 9(Pyrimidin-2-yl)-9 <i>H</i> -carbazoles, (3q)            | S7      |
| 2.9  | <i>Ortho</i> arylation of carprofen derivative, 5a                                                | S7-S8   |
| 2.10 | Procedure for the synthesis of hyellazole derivatives                                             | S8-S10  |
| 2.11 | Deprotection of pyrimidine, 3a to form free carbazole, 14                                         | S10-S11 |
| 2.12 | Procedure for trapping the aryl radical using TEMPO                                               | S11     |
| 3.0  | Crystallographic data                                                                             | S11-S16 |
| 3.1  | Crystallographic data for compound 4g                                                             | S12     |
| 3.2  | Crystallographic data for compound 4i                                                             | S13     |
| 3.3  | Crystallographic data for compound 4k                                                             | S14     |
| 3.4  | Crystallographic data for compound 4m                                                             | S15-S16 |
| 5.0  | Analytical data of compounds                                                                      | S17-S31 |
| 6.0  | <sup>1</sup> H NMR and <sup>13</sup> C NMR spectra of compounds                                   | S32-S90 |

## 1. General Information:

All the vials (Borosil) used for carrying out the reactions were dried overnight on hot air oven at 120 °C. All chemicals were obtained from commercial sources and were used as received unless otherwise noted. Carbazoles<sup>[31–33]</sup> and aryl diazonium salts<sup>[34,35]</sup> were synthesized according to literature reports. All the anhydrous solvents required were purchased from TCI, Sigma Aldrich and spectrochem and used without further purification. Reactions were monitored using precoated aluminum supported silica gel 60 F<sub>254</sub> TLC (thin layer chromatography) plates (Merck) and are visualized by UV light at 254 nm. The final products were purified using column chromatography (100-200 mesh silica gel purchased from Merck). <sup>1</sup>H NMR (400 MHz), <sup>19</sup>F NMR (376 MHz), and <sup>13</sup>C NMR (101 MHz) spectra were recorded on the Bruker AVANCE NEO 400 MHz spectrometer. Deuterated chloroform was used as solvent for NMR, and Chemical shifts (δ) for <sup>1</sup>H and <sup>13</sup>C-NMR spectra are given in ppm relative to tetramethylsilane (TMS) [δ 7.27 for <sup>1</sup>H (chloroform-d), δ 77.0 for <sup>13</sup>C (chloroform-d), <sup>19</sup>F-NMR spectra are not externally calibrated and chemical shifts are given relative to CCl<sub>3</sub>F as received from the automatic data processing. Abbreviations used in the NMR experiments: br, broad; s, singlet; d, doublet; t, triplet; q, quartet; sep, septet; dd, doublet of doublet; m, multiplet. High resolution mass spectra (HRMS) was obtained from Orbitrap Elite HybridIon Trap-Orbitrap (ThermoFischer scientific, Newington, NH, USA) Mass spectrometer in electrospray ionization mode (ESI<sup>+</sup>). X-ray data for the compounds were collected on a Bruker D8 VENTURE diffractometer instrument with an I $\mu$ S 3.0 Mo source ( $\lambda = 0.7107 \text{ \AA}$ ) and a PHOTON-III C28 detector.

## 2. Optimization table and Experimental procedures

The following substrates containing the directing groups were synthesized using literature procedures.<sup>[11]</sup>

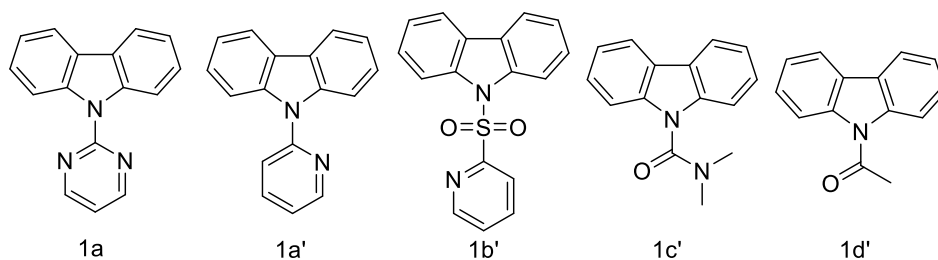

**Table S1: Optimization of monoarylation**

| SI NO           | Photocatalyst                                                     | TM (10 mol%)               | DG        | Solvent     | Yield      |
|-----------------|-------------------------------------------------------------------|----------------------------|-----------|-------------|------------|
| 1               | Eosin Y (5 mol %)                                                 | Pd(OAc) <sub>2</sub>       | 1a        | DMF         | -          |
| 2               | Ru(bpy) <sub>3</sub> Cl <sub>2</sub> (5 mol %)                    | Pd(OAc) <sub>2</sub>       | 1a        | DMF         | 27%        |
| <b>3</b>        | <b>Ru(bpy)<sub>3</sub>Cl<sub>2</sub> (2.5 mol %)</b>              | <b>Pd(OAc)<sub>2</sub></b> | <b>1a</b> | <b>MeOH</b> | <b>82%</b> |
| 4               | Ru(bpy) <sub>3</sub> Cl <sub>2</sub> (2.5 mol %)                  | Pd(OAc) <sub>2</sub>       | 1a'       | MeOH        | 54%        |
| 5               | Ru(bpy) <sub>3</sub> Cl <sub>2</sub> (2.5 mol %)                  | Pd(OAc) <sub>2</sub>       | 1b'       | MeOH        | Trace      |
| 6               | Ru(bpy) <sub>3</sub> Cl <sub>2</sub> (2.5 mol %)                  | Pd(OAc) <sub>2</sub>       | 1c'       | MeOH        | -          |
| 7               | Ru(bpy) <sub>3</sub> Cl <sub>2</sub> (2.5 mol %)                  | Pd(OAc) <sub>2</sub>       | 1d'       | MeOH        | -          |
| 8               | Ru(bpy) <sub>3</sub> Cl <sub>2</sub> (2.5 mol %)                  | Pd(OAc) <sub>2</sub>       | 1a        | DMF         | -          |
| 9               |                                                                   | Pd(OAc) <sub>2</sub>       | 1a        | MeOH        | -          |
| 10              | Ru(bpy) <sub>3</sub> Cl <sub>2</sub> (2.5 mol %)                  |                            | 1a        | MeOH        |            |
| 11 <sup>b</sup> | Ru(bpy) <sub>3</sub> Cl <sub>2</sub> (2.5 mol %)                  | Pd(OAc) <sub>2</sub>       | 1a        | MeOH        | Trace      |
| 12 <sup>c</sup> | Ru(bpy) <sub>3</sub> Cl <sub>2</sub> (2.5 mol %)                  | Pd(OAc) <sub>2</sub>       | 1a        | MeOH        | 62%        |
| 13              | fac-Ir(ppy) <sub>3</sub> (2.5 mol %)                              | Pd(OAc) <sub>2</sub>       | 1a        | MeOH        | 44%        |
| 14              | Ru(phen) <sub>3</sub> (PF <sub>6</sub> ) <sub>2</sub> (2.5 mol %) | Pd(OAc) <sub>2</sub>       | 1a        | MeOH        | 68%        |

Reaction conditions: Carbazole **1** (1 equiv), aryldiazonium salt **2a** (4 equiv), Pd(OAc)<sub>2</sub> (10 mol%), Ru(bpy)<sub>3</sub>Cl<sub>2</sub> (2.5 mol%), in methanol under argon at room temperature for 24 hours, 44 W Blue LED (Kessil).<sup>b</sup>without light, <sup>c</sup>without argon.

**Table S2: Optimization of diarylation**

| SI NO | Photocatalyst                                    | TM                              | Time (h) | ArN <sub>2</sub> BF <sub>4</sub><br>(equiv) | Yield |
|-------|--------------------------------------------------|---------------------------------|----------|---------------------------------------------|-------|
| 1     | Ru(bpy) <sub>3</sub> Cl <sub>2</sub> (2.5 mol %) | Pd(OAc) <sub>2</sub> (10 mol %) | 36       | 4                                           | 35%   |
| 2     | Ru(bpy) <sub>3</sub> Cl <sub>2</sub> (2.5 mol %) | Pd(OAc) <sub>2</sub> (10 mol %) | 48       | 4                                           | 35%   |
| 3     | Ru(bpy) <sub>3</sub> Cl <sub>2</sub> (2.5 mol %) | Pd(OAc) <sub>2</sub> (10 mol %) | 24       | 5                                           | 61%   |
| 4     | Ru(bpy) <sub>3</sub> Cl <sub>2</sub> (2.5 mol %) | Pd(OAc) <sub>2</sub> (10 mol %) | 24       | 6                                           | 84%   |
| 5     | Ru(bpy) <sub>3</sub> Cl <sub>2</sub> (2.5 mol %) | Pd(OAc) <sub>2</sub> (10 mol %) | 24       | 8                                           | 79%   |
| 6     | Ru(bpy) <sub>3</sub> Cl <sub>2</sub> (5 mol %)   | Pd(OAc) <sub>2</sub> (10 mol %) | 24       | 6                                           | 78%   |
| 7     | Ru(bpy) <sub>3</sub> Cl <sub>2</sub> (2.5 mol %) | Pd(OAc) <sub>2</sub> (15 mol %) | 24       | 6                                           | 76%   |

Reaction conditions: Carbazoles **1** (1 equiv), Aryl diazonium salt **2** (6 equiv), Ru(bpy)<sub>3</sub>Cl<sub>2</sub> (2.5 mol %), Pd(OAc)<sub>2</sub> (10 mol %), in methanol under argon at room temperature for 24 h, 44 W Blue LED (Kessil).

### 2.1. General procedure for the synthesis of 9H-carbazoles (**1ah**, **1ai**, **1aj**)

#### Compounds **1af** and **1ag** were obtained commercially

Carbazoles **1ah**, **1ai**, **1aj** were synthesised following the literature procedures.<sup>[32]</sup> Aniline derivative (4.8 mmol), 1,2-dichlorobenzene (588 mg, 4.0 mmol), K<sub>3</sub>PO<sub>4</sub> (2.55 g, 12.0 mmol), Pd(OAc)<sub>2</sub> (45.0 mg, 5 mol %), tricyclohexylphosphene (PCy<sub>3</sub>) (112.0 mg, 10 mol%) and dry NMP (20 mL, 0.2 M) were added to a Schlenk tube with a magnetic stirring bar under argon atmosphere. The resulting mixture was heated at 135 °C for 18 h. The progress of the reaction was monitored by TLC. The mixture was cooled to room temperature and EtOAc was added to it. The resulting crude reaction mixture was filtered and washed several times with EtOAc. The filtrate was then washed twice with brine and then dried over anhydrous Na<sub>2</sub>SO<sub>4</sub>. The solvent was removed under reduced pressure and the desired 9H-carbazole was purified by silica gel column chromatography using hexane/ethyl acetate gradient as eluent.

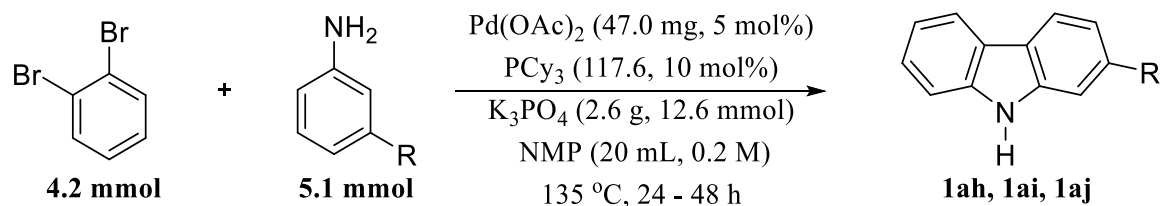

## 2.2. General procedure for synthesis of 9(pyrimidin-2-yl)-9H-carbazoles (1a, 1f-1j):

9(pyrimidin-2-yl)-9H-carbazoles (**1f-1j**) was synthesized using reported procedures.<sup>[36-38]</sup> To a stirred solution of carbazole (11.97 mmol) in DMF (57 mL, 0.21 M), NaH (60% dispersion in mineral oil, 575 mg, 14.37 mmol) was added in portions at 0 °C. After stirring for 30 min at that temperature, 2-chloropyrimidine (2.046 g, 17.95 mmol) was added and the mixture was stirred at 130 °C for 24 h. The reaction mixture was then cooled to room temperature, poured over H<sub>2</sub>O (400 mL) and extracted with EtOAc (4 × 75 mL). The combined organic phase was dried over Na<sub>2</sub>SO<sub>4</sub>. After filtration and evaporation of the solvents under reduced pressure, the crude product was purified by column chromatography on silica gel (n-hexane/EtOAc = 10/0.11) to afford the corresponding 9(pyrimidin-2-yl)-9H-carbazoles.

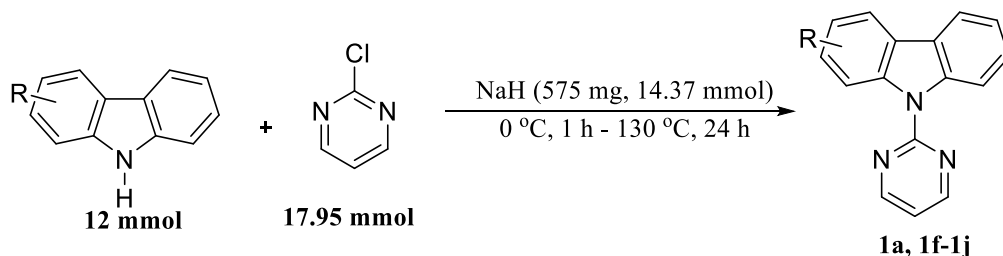

## 2.3. General procedure for the synthesis of 9(pyrimidin-2-yl)-9H-carbazoles derivatives (1b-1e):

To a solution of 2-bromo-9-(pyrimidin-2-yl)-9H-carbazole (**1f**) (323 mg, 1 equiv), arylboronic acid (1.2 equiv) in DME (3 mL) was added CsF (302 mg, 2 equiv) and Pd(PPh<sub>3</sub>)<sub>4</sub> (46.2 mg, 4 mol%) under argon atmosphere in a sealed tube. Heat the reaction mixture to 100 °C for 24 h followed by cooling the mixture to room temperature, then add ice cooled water to it. The reaction mixture was then extracted with EtOAc and dried over Na<sub>2</sub>SO<sub>4</sub>. The crude mixture was finally purified by column chromatography using hexane/EtOAc as eluent.

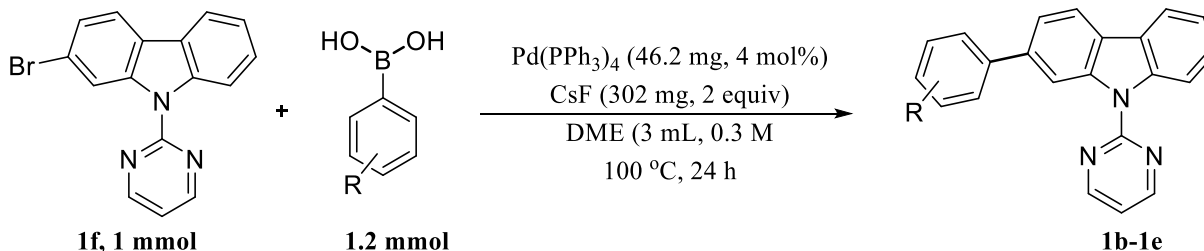

## 2.4. General procedure for the preparation of aryldiazonium tetrafluoroborates

In a 50 mL round-bottom flask, the aniline (10 mmol) was dissolved in a mixture of absolute ethanol (3 mL) and an aqueous solution of HBF<sub>4</sub> (50%, 5.4 mL, 3 equiv). The tert-butyl nitrite (1.7 mL, 1.5 equiv) was added drop wise to the solution at 0 °C. The mixture was stirred at room temperature for 1 h and diethyl ether (20 mL) was added to precipitate the arenediazonium tetrafluoroborate. The solid was filtered off and washed with diethyl ether (3 × 10 mL). The aryldiazonium tetrafluoroborate was dried in vacuo (10-3 mbar) for 10 minutes and was then directly used without further purification. Spectral data are agreement with the data available in the literature.<sup>[9,10]</sup>

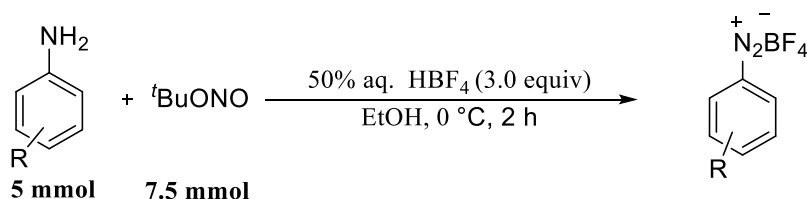

## 2.5. General procedure for *ortho* arylation of 9(pyrimidin-2-yl)-9H-carbazoles:

To an oven dried 4 mL vial, the corresponding carbazole derivative (0.1 mmol) aryldiazonium salt (0.4 mmol, 4 equiv), Ru(bpy)<sub>3</sub>Cl<sub>2</sub> (1.6 mg, 2.5 mol%) and Pd(OAc)<sub>2</sub> (2.24mg, 10 mol%) was added. Anhydrous MeOH (1 mL, 0.1 M) was then added to this reaction mixture and sealed with a Teflon screw cap. This mixture was then subjected to freeze pump thaw cycle using liquid nitrogen and high vacuum for three times in order to remove oxygen and maintain inert atmosphere (Argon). The mixture was irradiated with blue LED light for 2-24 h and the reaction mixture was monitored using TLC. Upon completion, the solvent was evaporated under reduced pressure. The reaction mixture was then subjected to column chromatography on silica gel (n-hexane/EtOAc) to get the pure product.

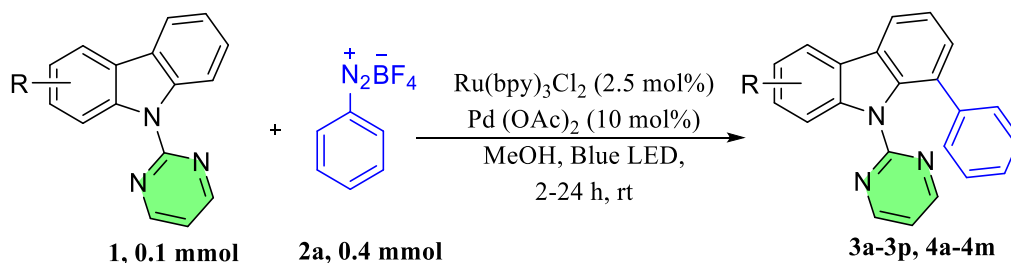

## 2.6. General procedure for diarylation of 9(pyrimidin-2-yl)-9H-carbazoles:

To an oven dried 4 mL vial containing the carbazole (0.1 mmol), was added aryldiazonium salt (0.6 mmol, 6 equiv), Ru(bpy)<sub>3</sub>Cl<sub>2</sub> (1.6 mg, 2.5 mol%) and Pd(OAc)<sub>2</sub> (2.24mg, 10 mol%). Anhydrous MeOH (1 mL, 0.1 M) was then added to this reaction mixture and then sealed with a Teflon screw cap. This mixture was then subjected to freeze pump thaw cycle using liquid nitrogen and high vacuum three times in order to remove oxygen and maintain inert atmosphere (Argon). The mixture was then irradiated with blue LED light for 2-24 h and the reaction mixture was monitored using TLC. Upon completion, the solvent was evaporated under reduced pressure. The reaction mixture was then subjected to column chromatography on silica gel (n-hexane/EtOAc) to get the pure product.

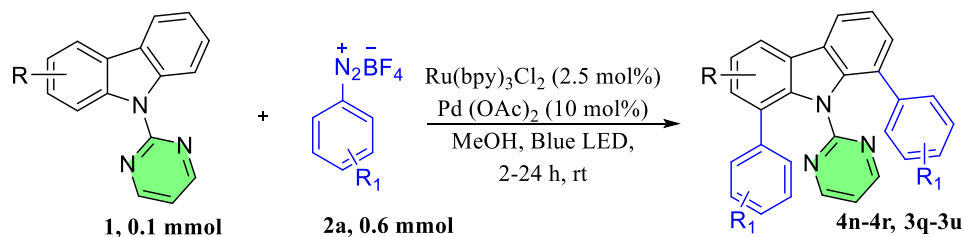

## 2.7. Gram scale procedure for monoarylation of 9(Pyrimidin-2-yl)-9H-carbazoles, (**3a**):

To an oven dried 50 mL RB, carbazole, **1a** (1 g, 4.1 mmol) aryldiazonium salt, **2a** (2.74 g, 4 equiv, 14.35 mmol), Ru(bpy)<sub>3</sub>Cl<sub>2</sub> (65.6 mg, 2.5 mol%) and Pd(OAc)<sub>2</sub> (91.8 mg, 10 mol%) was added. Anhydrous MeCN (41 mL, 0.2 M) was added to this reaction mixture and sealed with a rubber septum. This mixture was then subjected to freeze pump thaw cycle using liquid nitrogen and high vacuum three times in order to remove oxygen and maintain inert atmosphere (Argon). The mixture was irradiated with blue LED light for 12 h and the reaction mixture was monitored using TLC. Upon completion, the solvent was evaporated under reduced pressure. The reaction mixture was then subjected to column chromatography on silica gel (n-hexane/EtOAc) to get the pure product, **3a** (947.52 mg, 72 %).

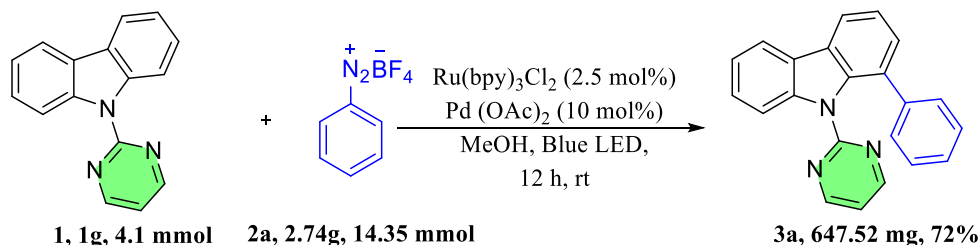

## 2.8. Gram scale procedure for diarylation of 9(Pyrimidin-2-yl)-9H-carbazoles, (3q):

To an oven dried 50 mL RB, carbazole, **1a** (1 g, 4.1 mmol) aryl diazonium salt, **2a** (4.7 g, 6 equiv, 14.35 mmol), Ru(bpy)<sub>3</sub>Cl<sub>2</sub> (65.6 mg, 2.5 mol%) and Pd(OAc)<sub>2</sub> (91.8 mg, 10 mol%) was added. Anhydrous MeCN (41 mL, 0.2 M) was then added to this reaction mixture and sealed with a rubber septum. This mixture was then subjected to freeze pump thaw cycle using liquid nitrogen and high vacuum three times in order to remove oxygen and maintain inert atmosphere (Argon). The mixture was irradiated with blue LED light for 12 h and the reaction mixture was monitored using TLC. Upon completion, the solvent was evaporated under reduced pressure. The reaction mixture was then subjected to column chromatography on silica gel (n-hexane/EtOAc) to get the pure product, **3q** (1.3g, 80 %).

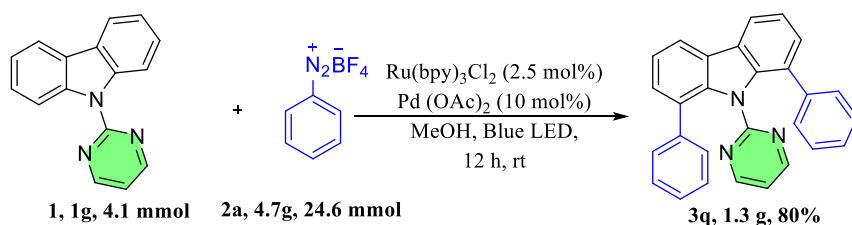

## 2.9. Ortho arylation of carprofen derivative, 5:

To an oven dried 4 mL vial, methyl 2-(6-chloro-9-(pyrimidin-2-yl)-9H-carbazol-2-yl) propanoate (36.5 mg, 0.1 mmol), aryl diazonium salt (76.4 mg, 0.4 mmol), Ru(bpy)<sub>3</sub>Cl<sub>2</sub> (1.6 mg, 2.5 mol%) and Pd(OAc)<sub>2</sub> (2.24 mg, 10 mol%) was added. Dry MeOH (1.0 mL, 0.1 M) was added to this reaction mixture and the vial was sealed with a Teflon screw cap. The mixture was then subjected to blue light irradiation for 12 h under O<sub>2</sub> atmosphere. The solvent was evaporated under reduced pressure. The reaction mixture was then subjected to column chromatography on silica gel (n-hexane/EtOAc) to afford product, **5a** in 30.4 mg (72%).

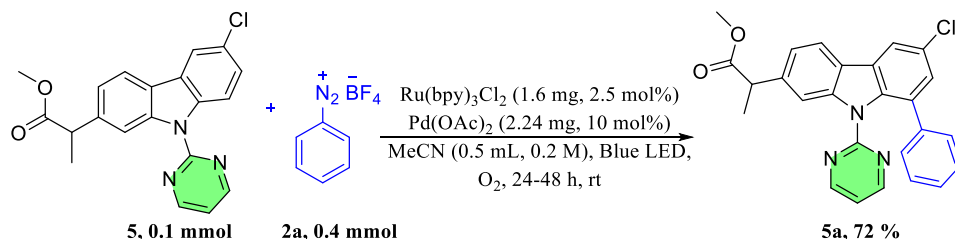

## 2.10. Procedure for the synthesis of hyellazole derivatives

### 2.10.1 Synthesis of 2-methoxy-1-methyl-4-nitrobenzene, 7:



To an oven dried 60 ml pressure tube, 4-nitro-*o*-cresol, **6** (765 mg, 5 mmol) was added along with KOH (1.4 g, 25 mmol) and acetone (17 mL, 0.3 M). Upon stirring, MeI (1.76 g, 12.5 mmol) was slowly added to this mixture and sealed in a pressure tube. The reaction mixture was heated at 90 °C for 3 hours. The solvent was evaporated under reduced pressure and the reaction mixture was then subjected to column chromatography on silica gel (n-hexane/EtOAc) to afford the pure product, **7** in 793 mg (95%).

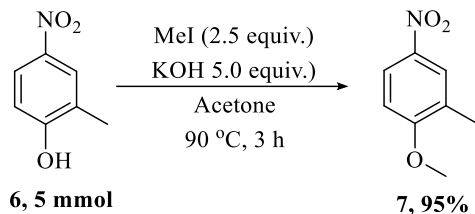

### 2.10.2 Synthesis of 3-methoxy-4-methylaniline, **8**:

To an oven dried 100 mL round bottom flask charged with a magnetic stir bar, compound **7** (668 mg, 4 mmol) was added along with Fe (1.1 g, 20 mmol) and acetic acid (100 mL). The reaction mixture was stirred at room temperature for 8 hours. The reaction mixture was passed through celite and the filtrate was neutralized with saturated sodium bicarbonate solution and extracted with EtOAc (4 × 75 mL). The combined organic phase was dried over Na<sub>2</sub>SO<sub>4</sub>. The reaction mixture was then subjected to column chromatography on silica gel (n-hexane/EtOAc) to afford the pure product, **8** in 482 mg (88%).

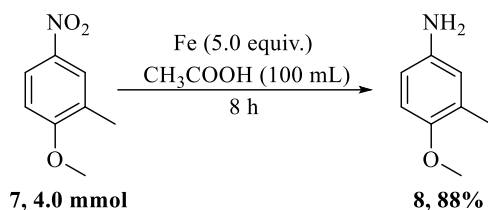

### 2.10.3 Synthesis of 2-methoxy-3-methyl-9H-carbazole, **10**:

Compound **8** (699 mg, 5.1 mmol), 1,2-dichlorobenzene (617 mg, 4.2 mmol), K<sub>3</sub>PO<sub>4</sub> (2.6 g, 12.2 mmol), Pd(OAc)<sub>2</sub> (47.0 mg, 5 mol %), tricyclohexylphosphene (PCy<sub>3</sub>) (117.6 mg, 10 mol%) and dry NMP (20 mL, 0.2 M) were added to a Schlenk tube with a magnetic stirring bar under argon atmosphere. The resulting mixture was heated at 135 °C for 18 h. The mixture was cooled to room temperature and EtOAc was added to it. The resulting crude reaction mixture was filtered and washed several times with the EtOAc. The filtrate was then washed twice with brine and then dried

over anhydrous Na<sub>2</sub>SO<sub>4</sub>. The solvent was removed under reduced pressure and the reaction mixture was subjected to column chromatography on silica gel (n-hexane/EtOAc) to afford the pure product, **10** in 580 mg (70 %).

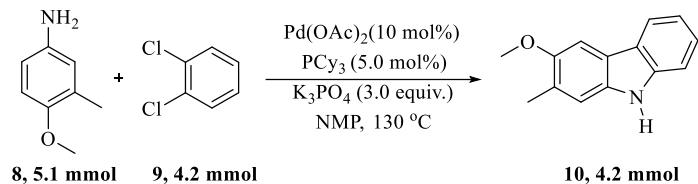

#### 2.10.4 Synthesis of 3-methoxy-2-methyl-9-(pyrimidin-2-yl)-9H-carbazole, **11**

3-methoxy-2-methyl-9-(pyrimidin-2-yl)-9H-carbazole, **10** was prepared using the general procedure **2.2**.

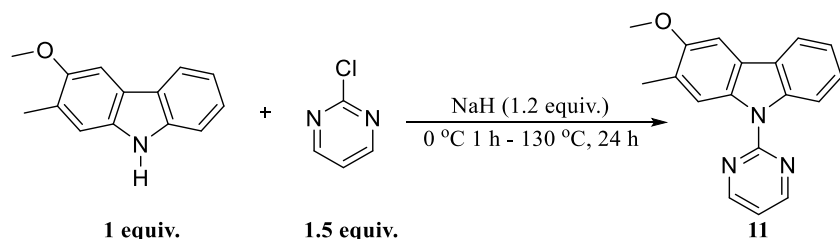

#### 2.10.5 Synthesis of hyellazole regioisomer, **12**

Hyellazole regioisomer (**12**) was prepared using the general procedure **2.4**.

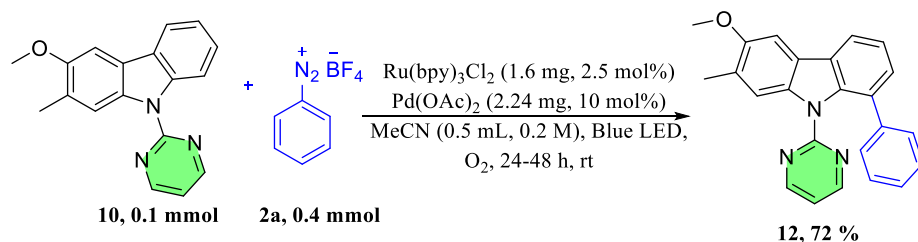

#### 2.10.6 Synthesis of functionalized hyellazole, **13**:

Functionalized Hyellazole (**13**) was prepared using the general procedure **2.5**.

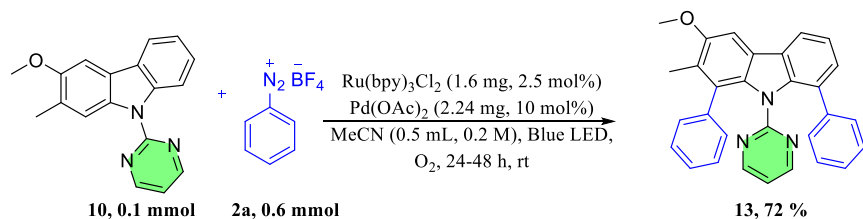

#### 2.11. Deprotection of pyrimidine, **3a** to form free carbazole, **14**:

To an oven dried 10 mL RB, 1-phenyl-9-(pyrimidin-2-yl)-9H-carbazole (500 mg, 1.43 mmol) was added along with sodium methoxide (471 mg, 8.6 mmol) in dry DMF (10 mL, 0.15 M). The

reaction mixture was heated to 120 °C for 12 h and brought to room temperature. Ice-cooled water was then added to the reaction mixture and the aqueous layer was extracted with ethyl acetate (3 × 20 mL). Dry the combined organic layers over Na<sub>2</sub>SO<sub>4</sub> followed by purification using column chromatography on silica gel (n-hexane/EtOAc) to afford product **14** in 302 mg (78%).

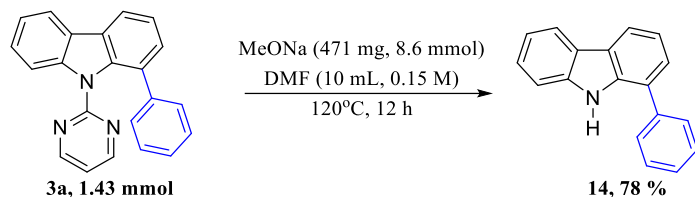

### 2.12. Procedure for trapping aryl radical using TEMPO:

To an oven dried 4 mL vial, carbazole, **1a** (24.5mg, 0.1 mmol) was added along with aryldiazonium salt, **2a** (76.4 mg, 0.4 mmol), Ru(bpy)<sub>3</sub>Cl<sub>2</sub> (1.64 mg, 2.5 mol%), Pd(OAc)<sub>2</sub> (2.24 mg, 10 mol%) and TEMPO (62.4 mg, 0.4 mmol). To this dry MeCN (0.5 mL, 0.2 M) was added, and the reaction mixture was sealed with a teflon screw cap. The reaction mixture was then irradiated with blue light for 48 h under oxygen atmosphere (balloon). The reaction was monitored by TLC and upon completion the solvent was evaporated under reduced pressure. The crude mixture was then subjected to HRMS analysis.

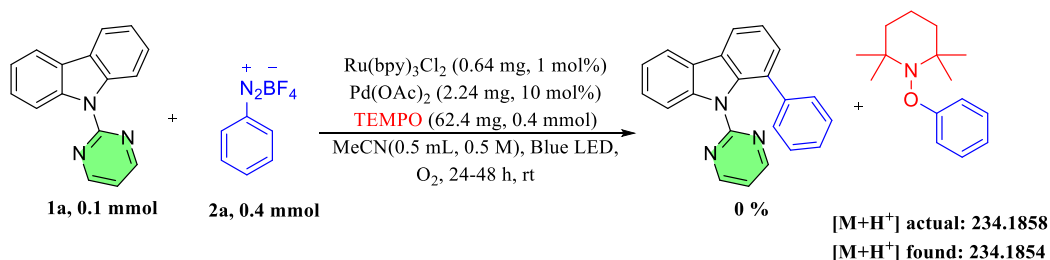

## 3.0 Crystallographic data

### General data collection and structure solution details:

X-ray data for the compound was collected at room temperature on a Bruker D8 VENTURE diffractometer instrument with an I $\mu$ S 3.0 Mo source ( $\lambda = 0.7107 \text{ \AA}$ ) and a PHOTON-III C28 detector. The raw data frames were reduced and corrected for absorption effects using the Bruker Apex 4 software suite programs.<sup>1</sup> The structure was refined with the SHELXL2 program and expanded using Fourier techniques. Anisotropic displacement parameters were included for all non-hydrogen atoms. CCDC contains the supplementary crystallographic data for this paper which can be obtained free of charge at <https://www.ccdc.cam.ac.uk/structures/>

### 3.1 Crystallographic data 4g

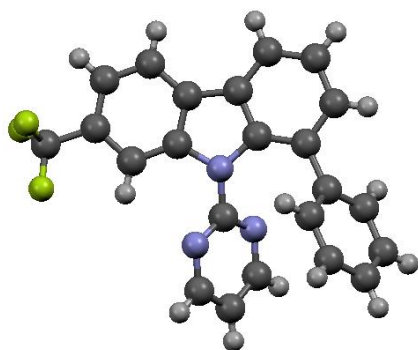

Figure S1. Crystal structure of 4g

Table S2 Crystal data and structure refinement of 4g

|                                                                                                                |                                                                  |
|----------------------------------------------------------------------------------------------------------------|------------------------------------------------------------------|
| CCDC number                                                                                                    | 2267782                                                          |
| Crystal data Crystal                                                                                           |                                                                  |
| Chemical formula                                                                                               | <u>2(C<sub>23</sub>H<sub>14</sub>F<sub>3</sub>N<sub>3</sub>)</u> |
| <i>M<sub>r</sub></i>                                                                                           | <u>778.74</u>                                                    |
| Crystal system, space group                                                                                    | <u>Monoclinic, <i>P</i>2<sub>1</sub>/<i>c</i></u>                |
| Temperature (K)                                                                                                | <u>150</u>                                                       |
| <i>a</i> , <i>b</i> , <i>c</i> (Å)                                                                             | <u>19.4774 (17), 12.0444 (11), 16.5411 (15)</u>                  |
| β (°)                                                                                                          | <u>106.097 (3)</u>                                               |
| <i>V</i> (Å <sup>3</sup> )                                                                                     | <u>3728.3 (6)</u>                                                |
| <i>Z</i>                                                                                                       | 4                                                                |
| Radiation type                                                                                                 | <u>Mo <i>K</i>α</u>                                              |
| μ (mm <sup>-1</sup> )                                                                                          | <u>0.10</u>                                                      |
| Crystal size (mm)                                                                                              | × ×                                                              |
| Data collection                                                                                                |                                                                  |
| Diffractometer                                                                                                 | <u>Bruker D8 venture</u>                                         |
| Absorption correction                                                                                          | -                                                                |
| No. of measured, independent and observed [ <i>I</i> > 2σ( <i>I</i> )] reflections                             | <u>25773, 7429, 4971</u>                                         |
| <i>R</i> <sub>int</sub>                                                                                        | <u>0.101</u>                                                     |
| (sin θ/λ) <sub>max</sub> (Å <sup>-1</sup> )                                                                    | <u>0.626</u>                                                     |
| Refinement                                                                                                     |                                                                  |
| <i>R</i> [ <i>F</i> <sup>2</sup> > 2σ( <i>F</i> <sup>2</sup> )], <i>wR</i> ( <i>F</i> <sup>2</sup> ), <i>S</i> | <u>0.056, 0.159, 1.05</u>                                        |
| No. of reflections                                                                                             | <u>7429</u>                                                      |
| No. of parameters                                                                                              | <u>579</u>                                                       |
| No. of restraints                                                                                              | <u>360</u>                                                       |
| H-atom treatment                                                                                               | <u>H-atom parameters constrained</u>                             |
| Δρ <sub>max</sub> , Δρ <sub>min</sub> (e Å <sup>-3</sup> )                                                     | <u>0.24, -0.27</u>                                               |

### 3.2 Crystallographic Data 4i

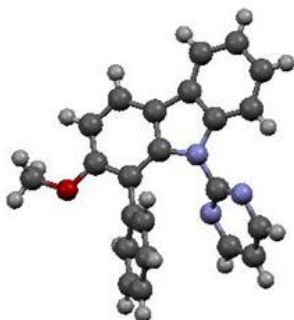

Figure S2. Crystal structure of 4i

Table S3 Crystal data and structure refinement of 4i

|                                                                            |                                        |
|----------------------------------------------------------------------------|----------------------------------------|
| CCDC number                                                                | 2267784                                |
| Crystal data                                                               |                                        |
| Chemical formula                                                           | $C_{2.71}H_2N_{0.35}O_{0.12}$          |
| $M_r$                                                                      | 41.34                                  |
| Crystal system, space group                                                | Monoclinic, $P2_1/c$                   |
| Temperature (K)                                                            | 149                                    |
| $a, b, c$ (Å)                                                              | 12.1412 (11), 12.7990 (9), 12.1671 (7) |
| $\beta$ (°)                                                                | 115.924 (3)                            |
| $V$ (Å <sup>3</sup> )                                                      | 1700.5 (2)                             |
| $Z$                                                                        | 34                                     |
| Radiation type                                                             | Mo $K\alpha$                           |
| $\mu$ (mm <sup>-1</sup> )                                                  | 0.09                                   |
| Crystal size (mm)                                                          | $\times \times$                        |
| Data collection                                                            |                                        |
| Diffractometer                                                             | Bruker D8 venture                      |
| Absorption correction                                                      | –                                      |
| No. of measured, independent and observed [ $I > 2\sigma(I)$ ] reflections | 6831, 3166, 2667                       |
| $R_{int}$                                                                  | 0.051                                  |
| $(\sin \theta/\lambda)_{max}$ (Å <sup>-1</sup> )                           | 0.607                                  |
| Refinement                                                                 |                                        |
| $R[F^2 > 2\sigma(F^2)]$ , $wR(F^2)$ , $S$                                  | 0.045, 0.121, 1.07                     |
| No. of reflections                                                         | 3166                                   |
| No. of parameters                                                          | 245                                    |
| H-atom treatment                                                           | H-atom parameters constrained          |
| $\Delta\rho_{max}$ , $\Delta\rho_{min}$ (e Å <sup>-3</sup> )               | 0.17, -0.27                            |

### 3.3 Crystallographic Data 4k

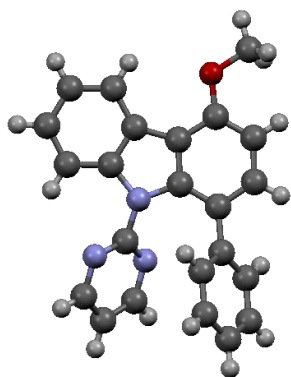

Figure S3. Crystal structure of 4k

Table S4 Crystal data and structure refinement of 4k

|                                                                            |                                                   |
|----------------------------------------------------------------------------|---------------------------------------------------|
| CCDC number                                                                | 2267783                                           |
| Crystal data                                                               |                                                   |
| Chemical formula                                                           | <u>C<sub>23</sub>H<sub>17</sub>N<sub>3</sub>O</u> |
| $M_r$                                                                      | <u>351.39</u>                                     |
| Crystal system, space group                                                | <u>Monoclinic, <math>P2_1/c</math></u>            |
| Temperature (K)                                                            | <u>150</u>                                        |
| $a, b, c$ (Å)                                                              | <u>7.3575 (5), 19.3150 (15), 12.3105 (9)</u>      |
| $\beta$ (°)                                                                | <u>97.192 (2)</u>                                 |
| $V$ (Å <sup>3</sup> )                                                      | <u>1735.7 (2)</u>                                 |
| $Z$                                                                        | <u>4</u>                                          |
| Radiation type                                                             | <u>Mo <math>K\alpha</math></u>                    |
| $\mu$ (mm <sup>-1</sup> )                                                  | <u>0.08</u>                                       |
| Crystal size (mm)                                                          | <u>× ×</u>                                        |
| Data collection                                                            |                                                   |
| Diffractometer                                                             | <u>Bruker D8 venture</u>                          |
| Absorption correction                                                      | <u>—</u>                                          |
| No. of measured, independent and observed [ $I > 2\sigma(I)$ ] reflections | <u>95588, 3073, 2476</u>                          |
| $R_{int}$                                                                  | <u>0.079</u>                                      |
| $(\sin \theta/\lambda)_{max}$ (Å <sup>-1</sup> )                           | <u>0.596</u>                                      |
| Refinement                                                                 |                                                   |
| $R[F^2 > 2\sigma(F^2)]$ , $wR(F^2)$ , $S$                                  | <u>0.037, 0.101, 1.02</u>                         |
| No. of reflections                                                         | <u>3073</u>                                       |
| No. of parameters                                                          | <u>245</u>                                        |
| H-atom treatment                                                           | <u>H-atom parameters constrained</u>              |
| $\Delta\rho_{max}$ , $\Delta\rho_{min}$ (e Å <sup>-3</sup> )               | <u>0.28, -0.16</u>                                |

### 3.4 Crystallographic Data 4m

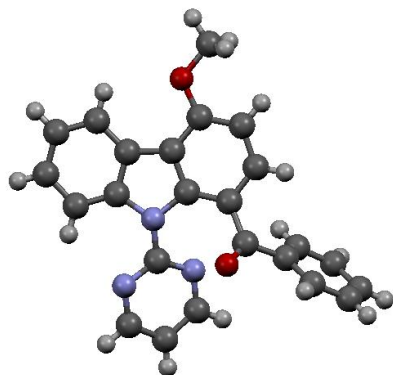

Figure S4. Crystal structure of 4m

Table S5 Crystal data and structure refinement of 4m

|                                                                                            |                                                                                                                                                                                                                                                                         |
|--------------------------------------------------------------------------------------------|-------------------------------------------------------------------------------------------------------------------------------------------------------------------------------------------------------------------------------------------------------------------------|
| CCDC number                                                                                |                                                                                                                                                                                                                                                                         |
| Crystal data                                                                               |                                                                                                                                                                                                                                                                         |
| Chemical formula                                                                           | <u>C<sub>24</sub>H<sub>17</sub>N<sub>3</sub>O<sub>2</sub></u>                                                                                                                                                                                                           |
| <i>M<sub>r</sub></i>                                                                       | <u>379.40</u>                                                                                                                                                                                                                                                           |
| Crystal system,<br>space group                                                             | <u>Monoclinic, <i>P</i>2<sub>1</sub>/<i>c</i></u>                                                                                                                                                                                                                       |
| Temperature (K)                                                                            | <u>100</u>                                                                                                                                                                                                                                                              |
| <i>a</i> , <i>b</i> , <i>c</i> (Å)                                                         | <u>12.7425 (10), 13.5862 (11), 10.3411 (7)</u>                                                                                                                                                                                                                          |
| β (°)                                                                                      | <u>97.302 (2)</u>                                                                                                                                                                                                                                                       |
| <i>V</i> (Å <sup>3</sup> )                                                                 | <u>1775.8 (2)</u>                                                                                                                                                                                                                                                       |
| <i>Z</i>                                                                                   | <u>4</u>                                                                                                                                                                                                                                                                |
| Radiation type                                                                             | <u>Mo Kα</u>                                                                                                                                                                                                                                                            |
| <i>M</i> (mm <sup>-1</sup> )                                                               | <u>0.09</u>                                                                                                                                                                                                                                                             |
| Crystal size (mm)                                                                          | <u>0.20 × 0.1 × 0.05</u>                                                                                                                                                                                                                                                |
| Data collection                                                                            |                                                                                                                                                                                                                                                                         |
| Diffractometer                                                                             | <u>Bruker D8 Venture</u>                                                                                                                                                                                                                                                |
| Absorption<br>correction                                                                   | <u>Multi-scan<br/>SADABS2016/2 (Bruker,2016/2) was used for absorption correction.<br/>wR<sub>2</sub>(int) was 0.0966 before and 0.0769 after correction. The Ratio of<br/>minimum to maximum transmission is 0.9522. The λ/2 correction factor<br/>is Not present.</u> |
| <i>T<sub>min</sub></i> , <i>T<sub>max</sub></i>                                            | <u>0.702, 0.737</u>                                                                                                                                                                                                                                                     |
| No of measured,<br>independent and<br>observed [ <i>I</i> ≥<br>2σ( <i>I</i> )] reflections | <u>42328, 3158, 2421</u>                                                                                                                                                                                                                                                |
| <i>R<sub>int</sub></i>                                                                     | <u>0.087</u>                                                                                                                                                                                                                                                            |
| (sinθ/λ) <sub>max</sub> (Å <sup>-1</sup> )                                                 | <u>0.596</u>                                                                                                                                                                                                                                                            |

|                                                                  |                                      |
|------------------------------------------------------------------|--------------------------------------|
| refinement                                                       |                                      |
| $R[F^2 > 2\sigma(F^2)],$<br>$wR(F^2), S$                         | <u>0.036, 0.091, 1.06</u>            |
| No. of reflections                                               | <u>3158</u>                          |
| No. of parameters                                                | <u>263</u>                           |
| H-atom treatment                                                 | <u>H-atom parameters constrained</u> |
| $\Delta\rho_{\max}, \Delta\rho_{\min}$ (e<br>$\text{\AA}^{-3}$ ) | <u>0.18, -0.22</u>                   |

## References

- [1] D.-Y. Goo, S. K. Woo, *Org. Biomol. Chem.* **2016**, *14*, 122–130.
- [2] L. Ackermann, A. Althammer, P. Mayer, *Synthesis (Stuttg)*. **2009**, *2009*, 3493–3503.
- [3] C. Suzuki, K. Hirano, T. Satoh, M. Miura, *Org. Lett.* **2015**, *17*, 1597–1600.
- [4] J. Wu, Y. Gu, X. Leng, Q. Shen, *Angew. Chemie - Int. Ed.* **2015**, *54*, 7648–7652.
- [5] S. W. Youn, H. J. Yoo, E. M. Lee, S. Y. Lee, *Adv. Synth. Catal.* **2018**, *360*, 278–283.
- [6] L. Zhu, X. Cao, R. Qiu, T. Iwasaki, V. P. Reddy, X. Xu, S.-F. Yin, N. Kambe, *RSC Adv.* **2015**, *5*, 39358–39365.
- [7] R. Qiu, V. P. Reddy, T. Iwasaki, N. Kambe, *J. Org. Chem.* **2015**, *80*, 367–374.
- [8] K. Harsha Vardhan Reddy, R. U. Kumar, V. P. Reddy, G. Satish, J. B. Nanubolu, Y. V. D. Nageswar, *RSC Adv.* **2016**, *6*, 54431–54434.
- [9] L. Huang, D. Hackenberger, L. J. Gooßen, *Angew. Chemie Int. Ed.* **2015**, *54*, 12607–12611.
- [10] J. Wu, Y. Gu, X. Leng, Q. Shen, *Angew. Chemie - Int. Ed.* **2015**, *54*, 7648–7652.
- [11] D. Guo, B. Li, W. Gao, W. Zhang, Y. Wang, J. Zhao, *Synlett* **2021**, *32*, 800–804.



## 5.0. Analytical data of compounds

### 2-phenyl-9-(pyrimidin-2-yl)-9H-carbazole (1b)

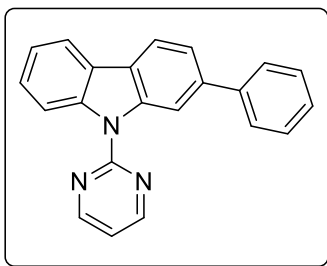

Yield (0.1 mmol scale, 36 mg, 78 %); white solid (hexane/ethyl acetate = 9.1:1.0, V/V). **<sup>1</sup>H NMR** (400 MHz, CDCl<sub>3</sub>) δ 9.14 (dd, *J* = 1.5, 0.5 Hz, 1H), 8.91 – 8.82 (m, 3H), 8.16 – 8.08 (m, 2H), 7.79 – 7.74 (m, 2H), 7.64 (dd, *J* = 8.0, 1.6 Hz, 1H), 7.56 – 7.49 (m, 3H), 7.43 – 7.37 (m, 2H), 7.13 (t, *J* = 4.8 Hz, 1H). **<sup>13</sup>C NMR** (101 MHz, CDCl<sub>3</sub>) δ 159.17 (s), 157.93 (s), 142.28 (s), 140.02 (s), 139.71 (s), 139.63 (s), 128.74 (s), 127.73 (s), 127.07 (s), 126.64 (s), 125.56 (s), 125.01 (s), 122.43 (s), 121.89 (s), 119.71 (s), 119.59 (s), 116.29 (s), 116.07 (s), 115.09 (s). **HR-MS** (ESI) *m/z* calcd for C<sub>25</sub>H<sub>16</sub>N<sub>3</sub><sup>+</sup>[M+H<sup>+</sup>] 322.1344, found 322.1339.

### 2-(4-methoxyphenyl)-9-(pyrimidin-2-yl)-9H-carbazole (1c)

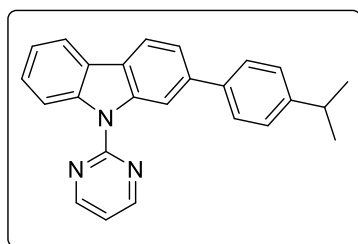

Yield (0.1 mmol scale, 36 mg, 78 %); white solid (hexane/ethyl acetate = 9.1:1.0, V/V). **<sup>1</sup>H NMR** (400 MHz, CDCl<sub>3</sub>) δ 9.02 (dd, *J* = 1.5, 0.5 Hz, 1H), 8.78 – 8.68 (m, 3H), 7.97 (ddd, *J* = 4.7, 1.9, 0.6 Hz, 2H), 7.63 – 7.54 (m, 2H), 7.50 (dd, *J* = 8.0, 1.6 Hz, 1H), 7.40 (ddd, *J* = 8.5, 7.2, 1.4 Hz, 1H), 7.27 (ddd, *J* = 8.1, 5.3, 1.4 Hz, 3H), 6.96 (t, *J* = 4.8 Hz, 1H), 2.89 (dt, *J* = 13.8, 6.9 Hz, 1H), 1.23 (d, *J* = 6.9 Hz, 6H). **<sup>13</sup>C NMR** (101 MHz, CDCl<sub>3</sub>) δ 159.22 (s), 157.90 (s), 147.83 (s), 140.05 (s), 139.85 (s), 139.76 (s), 139.63 (s), 127.68 (s), 126.86 (s), 126.56 (s), 125.67 (s), 124.82 (s), 122.42 (s), 121.83 (s), 119.65 (s), 119.54 (s), 116.34 (s), 116.01 (s), 115.02 (s), 33.88 (s), 24.12 (s). **HR-MS** (ESI) *m/z* calcd for C<sub>25</sub>H<sub>22</sub>N<sub>3</sub><sup>+</sup>[M+H<sup>+</sup>] 364.1814, found 364.1832

### 9-(pyrimidin-2-yl)-2-(p-tolyl)-9H-carbazole (1d)

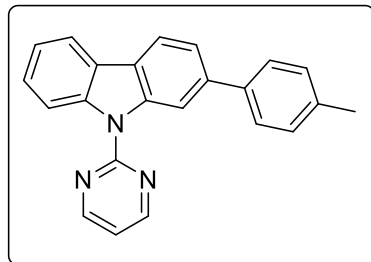

Yield (0.1 mmol scale, 36 mg, 78 %); white solid (hexane/ethyl acetate = 9.1:1.0, V/V). **<sup>1</sup>H NMR** (400 MHz, CDCl<sub>3</sub>) δ 9.15 (dd, *J* = 1.5, 0.4 Hz, 1H), 8.91 – 8.87 (m, 1H), 8.83 (d, *J* = 4.8 Hz, 2H), 8.14 – 8.09 (m, 2H), 7.66 (ddd, *J* = 9.6, 7.2, 1.7 Hz, 3H), 7.54 (ddd, *J* = 8.5, 7.2, 1.3 Hz, 1H), 7.41 (td, *J* = 7.7, 1.0 Hz, 1H), 7.33 (d, *J* = 7.8 Hz, 2H), 7.09 (t, *J* = 4.8 Hz, 1H), 2.47 (s, 3H). **<sup>13</sup>C NMR** (101 MHz, CDCl<sub>3</sub>) δ 159.18 (s), 157.97 (s), 140.00 (s), 139.72 (s), 139.58 (s), 139.41 (s), 136.81 (s), 129.46 (s), 127.56 (s), 126.54 (s), 125.62 (s), 124.78 (s), 122.40 (s), 121.75 (s), 119.65 (s), 119.53 (s), 116.26 (s), 116.06 (s), 114.87 (s), 21.16 (s). **HR-MS** (ESI) *m/z* calcd for C<sub>23</sub>H<sub>18</sub>N<sub>3</sub><sup>+</sup>[M+H<sup>+</sup>] 336.1501, found 336.1492.

### 2-(4-methoxyphenyl)-9-(pyrimidin-2-yl)-9H-carbazole (1e)

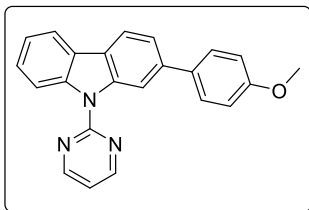

Yield (0.1 mmol scale, 36 mg, 78 %); white solid (hexane/ethyl acetate = 9.1:1.0, V/V). **<sup>1</sup>H NMR** (400 MHz, CDCl<sub>3</sub>) δ 9.02 (d, *J* = 1.0 Hz, 1H), 8.84 (dd, *J* = 15.4, 6.6 Hz, 3H), 8.10 (dd, *J* = 7.9, 1.8 Hz, 2H), 7.58 (dd, *J* = 8.0, 1.4 Hz, 1H), 7.55 – 7.46 (m, 2H), 7.41 – 7.35 (m, 2H), 7.13 – 7.08 (m, 2H), 7.06 (dd, *J* = 8.3, 0.8 Hz, 1H), 3.85 (s, 3H). **<sup>13</sup>C NMR** (101 MHz, CDCl<sub>3</sub>) δ 159.17 (s), 158.38 (s), 157.76 (s), 140.41 (s), 119.70 (s), 119.09 (s), 115.87 (s), 109.82 (s), 101.94 (s), 55.79 (s). **HR-MS** (ESI) *m/z* calcd for C<sub>23</sub>H<sub>18</sub>N<sub>3</sub>O<sup>+</sup>[M+H<sup>+</sup>] 352.1450, found 352.1442.

### 2-bromo-9-(pyrimidin-2-yl)-9H-carbazole (1f)

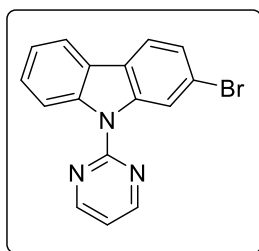

Yield (0.1 mmol scale, 36 mg, 78 %); white solid (hexane/ethyl acetate = 9.1:1.0, V/V). **<sup>1</sup>H NMR** (400 MHz, CDCl<sub>3</sub>) δ 9.10 (d, *J* = 1.6 Hz, 1H), 8.86 (dd, *J* = 5.0, 2.8 Hz, 3H), 8.04 (ddd, *J* = 7.7, 1.2, 0.6 Hz, 1H), 7.92 (d, *J* = 8.2 Hz, 1H), 7.56 – 7.48 (m, 2H), 7.41 – 7.36 (m, 1H), 7.16 (t, *J* = 4.8 Hz, 1H). **<sup>13</sup>C NMR** (101 MHz, CDCl<sub>3</sub>) δ 158.88 (s), 157.96 (s), 139.77 (s), 139.23 (s), 127.03 (s), 125.43 (s), 125.05 (s), 124.73 (s), 122.64 (s), 120.53 (s), 120.16 (s), 119.51 (s), 119.45 (s), 116.50 (s), 116.34 (s). **HR-MS** (ESI) *m/z* calcd for C<sub>16</sub>H<sub>11</sub>BrN<sub>3</sub><sup>+</sup>[M+H<sup>+</sup>] 324.0136, found 324.0127.

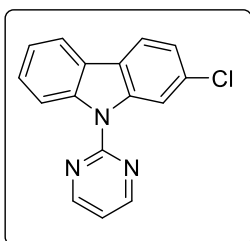

### 2-chloro-9-(pyrimidin-2-yl)-9H-carbazole (1g)

Yield (0.1 mmol scale, 36 mg, 78 %); white solid (hexane/ethyl acetate = 9.1:1.0, V/V). **<sup>1</sup>H NMR** (400 MHz, CDCl<sub>3</sub>) δ 8.96 – 8.92 (m, 1H), 8.88 – 8.83 (m, 3H), 8.03 (ddd, *J* = 7.7, 1.3, 0.7 Hz, 1H), 7.99 – 7.94 (m, 1H), 7.52 (ddd, *J* = 8.5, 7.2, 1.3 Hz, 1H), 7.41 – 7.34 (m, 2H), 7.14 (t, *J* = 4.8 Hz, 1H). **<sup>13</sup>C NMR** (101 MHz, CDCl<sub>3</sub>) δ 158.89 (s), 157.92 (s), 139.54 (s), 139.39 (s), 132.17 (s), 126.87 (s), 125.06 (s), 124.36 (s), 122.69 (s), 122.62 (s), 120.16 (s), 119.47 (s), 116.65 (s), 116.53 (s), 116.30 (s). **HR-MS** (ESI) *m/z* calcd for C<sub>16</sub>H<sub>11</sub>ClN<sub>3</sub><sup>+</sup>[M+H<sup>+</sup>] 280.7350, found 280.7337.

### 2-trifluoromethyl-9-(pyrimidin-2-yl)-9H-carbazole (1h)

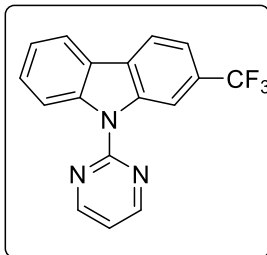

Yield (0.1 mmol scale, 36 mg, 78 %); white solid (hexane/ethyl acetate = 9.1:1.0, V/V). **<sup>1</sup>H NMR** (400 MHz, CDCl<sub>3</sub>) δ 9.11 (s, 1H), 8.78 (dd, *J* = 13.4, 6.6 Hz, 3H), 8.02 (dd, *J* = 13.1, 7.9 Hz, 2H), 7.55 – 7.44 (m, 2H), 7.31 (t, *J* = 7.4 Hz, 1H), 7.06 (t, *J* = 4.7 Hz, 1H). **<sup>13</sup>C NMR** (101 MHz, CDCl<sub>3</sub>) δ 158.89 (s), 157.99 (s), 140.04 (s), 138.41 (s), 128.42 (s), 128.10 (s), 127.84 (s), 126.28 (s), 124.62 (s), 123.57 (s), 122.71 (s), 120.10 (s), 119.69 (s), 119.01 (d, *J* = 3.7 Hz), 116.56 (d, *J* = 19.0 Hz), 113.98 (d, *J* = 4.3 Hz). **HR-MS** (ESI) *m/z* calcd for C<sub>17</sub>H<sub>11</sub>F<sub>3</sub>N<sub>3</sub> O<sup>+</sup>[M+H<sup>+</sup>] 314.0905, found 314.0893.

### 2-methoxy-9-(pyrimidin-2-yl)-9H-carbazole (1i)

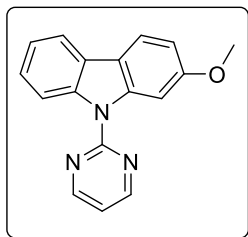

Yield (0.1 mmol scale, 36 mg, 78 %); white solid (hexane/ethyl acetate = 9.1:1.0, V/V). **<sup>1</sup>H NMR** (400 MHz, CDCl<sub>3</sub>) δ 8.86 – 8.81 (m, 3H), 8.50 (d, *J* = 2.3 Hz, 1H), 8.00 – 7.94 (m, 2H), 7.44 (ddd, *J* = 8.5, 7.2, 1.4 Hz, 1H), 7.35 (td, *J* = 7.5, 1.0 Hz, 1H), 7.12 (t, *J* = 4.8 Hz, 1H), 7.00 (dd, *J* = 8.5, 2.4 Hz, 1H), 3.97 (s, 3H). **<sup>13</sup>C NMR** (101 MHz, CDCl<sub>3</sub>) δ 159.28 (s), 159.19 (s), 157.85 (s), 140.39 (s), 139.24 (s), 125.91 (s), 125.35 (s), 122.38 (s), 120.00 (s), 119.54 (s), 118.73 (s), 116.17 (s), 115.95 (s), 110.08 (s), 101.45 (s), 55.77 (s). **HR-MS** (ESI) *m/z* calcd for C<sub>17</sub>H<sub>14</sub>ClN<sub>3</sub> O<sup>+</sup>[M+H<sup>+</sup>] 276.1137, found 276.1142.

### 5-(pyrimidin-2-yl)-5H-[1,3]dioxolo[4,5-b]carbazole (1j)

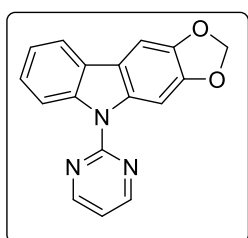

Yield (0.1 mmol scale, 36 mg, 78 %); white solid (hexane/ethyl acetate = 9.1:1.0, V/V). **<sup>1</sup>H NMR** (400 MHz, CDCl<sub>3</sub>) δ 8.83 (t, *J* = 5.7 Hz, 3H), 8.41 (d, *J* = 8.7 Hz, 1H), 8.07 (d, *J* = 7.5 Hz, 1H), 7.51 (t, *J* = 7.8 Hz, 1H), 7.36 (t, *J* = 7.3 Hz, 1H), 7.11 (t, *J* = 4.1 Hz, 1H), 7.03 (d, *J* = 8.7 Hz, 1H), 6.20 (s, 2H). **<sup>13</sup>C NMR** (101 MHz, CDCl<sub>3</sub>) δ 159.16 (s), 157.82 (s), 142.84 (s), 140.56 (s), 139.66 (s), 135.60 (s), 126.68 (s), 122.98 (s), 122.43 (s), 121.99 (s), 116.17 (s), 115.83 (s), 110.66 (s), 108.19 (s), 106.78 (s), 101.87 (s). **HR-MS** (ESI) *m/z* calcd for C<sub>17</sub>H<sub>12</sub>N<sub>3</sub> O<sub>2</sub><sup>+</sup>[M+H<sup>+</sup>] 290.0930, found 290.0932.

### 1-phenyl-9-(pyridin-2-yl)-9H-carbazole (3a')

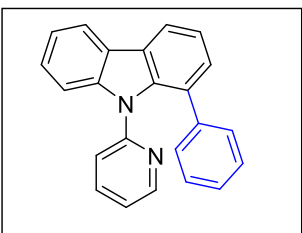

Yield (0.1 mmol scale, 26 mg, 82 %); white solid (hexane/ethyl acetate = 9.1:1.0, V/V). **<sup>1</sup>H NMR** (400 MHz, CDCl<sub>3</sub>) δ 8.37 (dd, *J* = 4.7, 1.3 Hz, 1H), 8.20 – 8.13 (m, 2H), 7.65 (d, *J* = 8.2 Hz, 1H), 7.44 – 7.39 (m, 3H), 7.33 (t, *J* = 7.3 Hz, 1H), 7.23 (dd, *J* = 7.7, 1.8 Hz, 1H), 7.16 (dd, *J* = 6.3, 2.9 Hz, 2H), 7.06 – 7.00 (m, 3H), 6.96 (dd, *J* = 7.0, 5.0 Hz, 1H), 6.74 (d, *J* = 8.0 Hz, 1H). **<sup>13</sup>C NMR** (101 MHz, CDCl<sub>3</sub>) δ 151.5, 148.3, 141.6, 139.7, 137.1, 136.7, 128.6, 128.5, 127.7, 126.9, 126.5, 126.2, 125.8, 123.9, 121.6, 121.2, 121.0, 120.9, 120.1, 119.4, 111.0. **HR-MS** (ESI) *m/z* calcd for C<sub>23</sub>H<sub>17</sub>N<sub>2</sub><sup>+</sup>[M+H<sup>+</sup>] 321.1393, found 321.1394.

### 1-phenyl-9-(pyrimidin-2-yl)-9H-carbazole (3a)

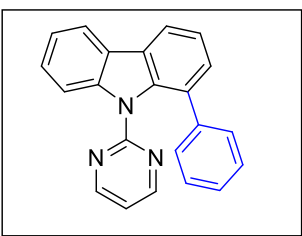

Yield (0.1 mmol scale, 26 mg, 82 %); white solid (hexane/ethyl acetate = 9.1:1.0, V/V). **<sup>1</sup>H NMR** (400 MHz, CDCl<sub>3</sub>) δ 8.80 (d, *J* = 4.8 Hz, 2H), 8.48 (d, *J* = 2.3 Hz, 2H), 7.88 – 7.76 (m, 2H), 7.07 (t, *J* = 4.8 Hz, 1H), 6.96 (dd, *J* = 8.5, 2.4 Hz, 2H), 3.95 (s, 6H). **<sup>13</sup>C NMR** (101 MHz, CDCl<sub>3</sub>) δ 157.6, 157.3, 141.45, 141.0, 137.1, 128.7, 128.5, 128.1, 127.7, 126.9, 126.8, 126.2, 125.2, 122.4, 122.1, 120.2, 119.3, 117.1, 112.3. **HR-MS** (ESI) *m/z* calcd for C<sub>22</sub>H<sub>16</sub>N<sub>3</sub><sup>+</sup>[M+H<sup>+</sup>] 322.1344, found 322.1339.

### 1-(3-fluorophenyl)-9-(pyrimidin-2-yl)-9H-carbazole (3b)

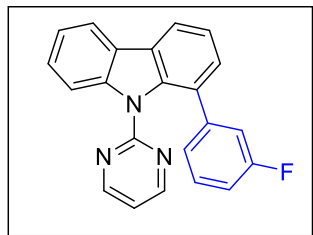

Yield (0.1 mmol scale, 27 mg, 80%); white solid (petroleum ether/ethyl acetate = 9.1:1.0, V/V).  $^1\text{H NMR}$  (400 MHz, Chloroform-*d*)  $\delta$  8.38 (d,  $J$  = 4.8 Hz, 2H), 8.21 – 8.06 (m, 3H), 7.51 – 7.41 (m, 3H), 7.38 (t,  $J$  = 7.5 Hz, 1H), 7.08 – 7.00 (m, 3H), 6.88 (t,  $J$  = 4.8 Hz, 1H), 6.79 (m, 1H).  $^{13}\text{C NMR}$  (101 MHz, Chloroform-*d*)  $\delta$  161.4 (d,  $J_{\text{C-F}}$  = 246.6 Hz), 157.5, 157.3, 143.5 (d,  $J_{\text{C-F}}$  = 8.0 Hz), 140.7, 136.8, 129.2 (d,  $J_{\text{C-F}}$  = 8.3 Hz), 128.4, 127.1, 126.9, 126.8, 124.9, 123.3, 122.3, 122.1, 120.1, 119.6, 117.1, 114.5 (d,  $J_{\text{C-F}}$  = 21.8 Hz), 112.7 (d,  $J_{\text{C-F}}$  = 21.2 Hz), 112.1. **HR-MS** (ESI)  $m/z$  calcd for  $\text{C}_{22}\text{H}_{15}\text{F}_3\text{N}_3^+[\text{M}+\text{H}^+]$  340.1250, found 340.1234.

### 1-(2-bromophenyl)-9-(pyrimidin-2-yl)-9H-carbazole (3c)

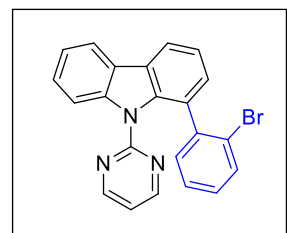

Yield (0.1 mmol scale, 28 mg, 69 %); white solid (hexane/ethyl acetate = 9.1:1.0, V/V).  $^1\text{H NMR}$  (400 MHz, Chloroform-*d*)  $\delta$  8.35 (d,  $J$  = 4.9 Hz, 2H), 8.20 – 8.09 (m, 3H), 7.49 – 7.40 (m, 4H), 7.36 (t,  $J$  = 7.2 Hz, 1H), 7.20 (dd,  $J$  = 7.6, 1.7 Hz, 1H), 7.08 (m, 1H), 6.96 (m, 1H), 6.82 (t,  $J$  = 4.8 Hz, 1H).  $^{13}\text{C NMR}$  (101 MHz, Chloroform-*d*)  $\delta$  157.34, 157.18, 142.22, 140.56, 136.92, 132.61, 131.05, 129.58, 128.04, 127.05, 126.94, 126.88, 126.71, 125.02, 123.17, 122.07, 121.69, 120.06, 119.91, 116.87, 112.35. **HR-MS** (ESI)  $m/z$  calcd for  $\text{C}_{22}\text{H}_{15}\text{BrN}_3^+[\text{M}+\text{H}^+]$  400.0449, found 400.0430.

### 1-(3-Bromophenyl)-9-(pyrimidin-2-yl)-9H-carbazole (3d)

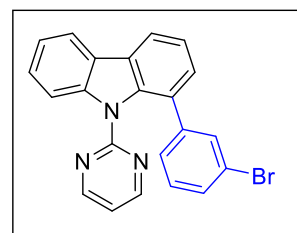

Yield (0.1 mmol scale, 31 mg, 78 %); white solid (hexane/ethyl acetate = 9.1:1.0, V/V).  $^1\text{H NMR}$  (400 MHz, Chloroform-*d*)  $\delta$  8.40 (d,  $J$  = 4.8 Hz, 2H), 8.18 – 8.06 (m, 3H), 7.49 – 7.43 (m, 3H), 7.41 – 7.34 (m, 2H), 7.23 (m, 2H), 7.00 (t,  $J$  = 7.8 Hz, 1H), 6.91 (t,  $J$  = 4.8 Hz, 1H).  $^{13}\text{C NMR}$  (101 MHz, Chloroform-*d*)  $\delta$  157.58, 143.42, 140.86, 136.91, 130.89, 129.62, 129.24, 128.48, 126.99, 126.82, 126.39, 124.97, 122.34, 122.19, 122.16, 120.23, 119.89, 117.44, 112.24. **HR-MS** (ESI)  $m/z$  calcd for  $\text{C}_{22}\text{H}_{15}\text{BrN}_3^+[\text{M}+\text{H}^+]$  400.0449, found 400.0435.

### 4-(9-(pyrimidin-2-yl)-9H-carbazol-1-yl)benzonitrile (3e)

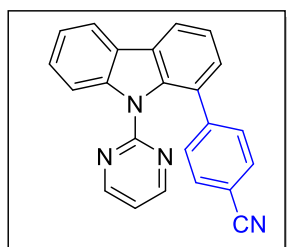

Yield (0.1 mmol scale, 24.5 mg, 70 %); white solid (hexane/ethyl acetate = 9.1:1.0, V/V).  $^1\text{H NMR}$  (400 MHz, Chloroform-*d*)  $\delta$  8.35 (d,  $J$  = 4.8 Hz, 2H), 8.23 (m, 3H), 7.52 (m, 8H), 6.91 (t,  $J$  = 4.8 Hz, 1H).  $^{13}\text{C NMR}$  (101 MHz, Chloroform-*d*)  $\delta$  157.60, 146.55, 140.89, 136.75, 131.83, 128.40, 128.24, 127.30, 127.23, 126.65, 125.04, 122.61, 122.51, 120.47, 120.25, 119.03, 117.40, 112.60, 109.71. **HR-MS** (ESI)  $m/z$  calcd for  $\text{C}_{23}\text{H}_{15}\text{N}_4^+[\text{M}+\text{H}^+]$  347.1297, found 347.1294.

### 1-(4-Nitrophenyl)-9-(pyrimidin-2-yl)-9H-carbazole (3f)

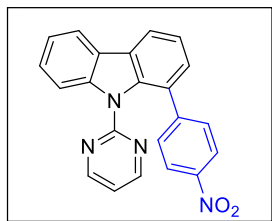

Yield (0.1 mmol scale, 28 mg, 75 %); white solid (hexane/ethyl acetate = 9.1:1.0, V/V).  $^1\text{H NMR}$  (400 MHz, Chloroform-*d*)  $\delta$  8.36 (d,  $J$  = 4.8 Hz, 2H), 8.22 – 8.12 (m, 3H), 7.99 (d,  $J$  = 8.7 Hz, 2H), 7.53 – 7.45 (m, 5H), 7.40 (m, 1H), 6.86 (t,  $J$  = 4.8 Hz, 1H).  $^{13}\text{C NMR}$  (101 MHz, Chloroform-*d*)  $\delta$  157.67, 148.66, 146.10, 140.92, 136.81, 128.48, 128.26, 127.38, 127.31, 126.28, 125.05, 123.35, 122.64, 122.60, 120.72, 120.29, 117.49, 112.68. HR-MS (ESI)  $m/z$  calcd for  $\text{C}_{22}\text{H}_{15}\text{N}_4\text{O}_2^+[\text{M}+\text{H}^+]$  367.1195, found 367.1178.

### 9-(pyrimidin-2-yl)-1-(3-(trifluoromethyl)phenyl)-9H-carbazole (3g)

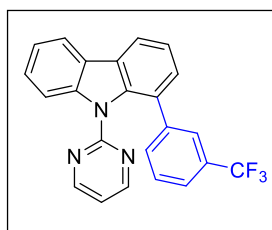

Yield (0.1 mmol scale, 31 mg, 81 %); white solid (hexane/ethyl acetate = 9.1:1.0, V/V).  $^1\text{H NMR}$  (400 MHz,  $\text{CDCl}_3$ )  $\delta$  8.32 (d,  $J$  = 4.8 Hz, 4H), 8.15 (t,  $J$  = 8.2 Hz, 6H), 7.56 – 7.42 (m, 10H), 7.38 (dd,  $J$  = 14.8, 7.7 Hz, 4H), 7.32 – 7.22 (m, 3H), 6.84 (t,  $J$  = 4.8 Hz, 2H).  $^{13}\text{C NMR}$  (101 MHz,  $\text{CDCl}_3$ )  $\delta$  157.5, 157.4, 142.4, 140.9, 136.9, 131.0, 128.6, 128.6, 127.1, 127.1, 126.9, 125.0, 124.5 (d,  $J$  = 3.7 Hz), 122.9 (d,  $J$  = 3.9 Hz), 122.5, 122.3, 120.2, 120.0, 117.2, 112.4. HR-MS (ESI)  $m/z$  calcd for  $\text{C}_{23}\text{H}_{15}\text{F}_3\text{N}_3^+[\text{M}+\text{H}^+]$  390.1218, found 390.1199.

### 1-(2-chloro-3-methylphenyl)-9-(pyrimidin-2-yl)-9H-carbazole (3h)

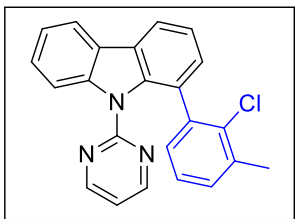

Yield (0.1 mmol scale, 30 mg, 80 %); white solid (hexane/ethyl acetate = 9.1:1.0, V/V).  $^1\text{H NMR}$  (400 MHz,  $\text{CDCl}_3$ )  $\delta$  8.34 (d,  $J$  = 4.8 Hz, 2H), 8.17 – 8.11 (m, 2H), 7.99 (d,  $J$  = 8.2 Hz, 1H), 7.44 (ddd,  $J$  = 7.6, 3.7, 1.7 Hz, 2H), 7.35 (ddd,  $J$  = 8.5, 7.7, 0.9 Hz, 2H), 7.14 – 7.04 (m, 2H), 6.93 (t,  $J$  = 7.8 Hz, 1H), 6.86 (t,  $J$  = 4.8 Hz, 1H), 2.11 (s, 3H).  $^{13}\text{C NMR}$  (101 MHz,  $\text{CDCl}_3$ )  $\delta$  157.23, 157.1, 143.0, 140.7, 137.3, 134.8, 134.0, 128.9, 128.1, 127.6, 127.0, 126.9, 126.4, 126.2, 124.8, 122.0, 121.8, 120.2, 119.6, 117.3, 112.0, 17.8. HR-MS (ESI)  $m/z$  calcd for  $\text{C}_{23}\text{H}_{17}\text{ClN}_3^+[\text{M}+\text{H}^+]$  370.1111, found 370.1101.

### 1-(4-methoxy-3-methylphenyl)-9-(pyrimidin-2-yl)-9H-carbazole (3i)

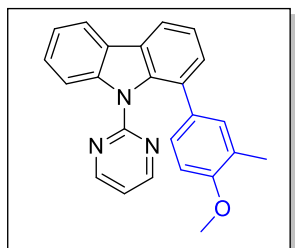

Yield (0.1 mmol scale, 28 mg, 78 %); white solid (hexane/ethyl acetate = 9.1:1.0, V/V).  $^1\text{H NMR}$  (400 MHz,  $\text{CDCl}_3$ )  $\delta$  8.26 (d,  $J$  = 4.8 Hz, 2H), 8.05 (ddd,  $J$  = 8.9, 4.4, 1.0 Hz, 2H), 7.93 – 7.88 (m, 1H), 7.39 – 7.30 (m, 2H), 7.30 – 7.23 (m, 2H), 6.95 (d,  $J$  = 8.3 Hz, 1H), 6.76 (t,  $J$  = 4.8 Hz, 1H), 6.50 – 6.41 (m, 2H), 3.66 (s, 3H), 1.98 (s, 3H).  $^{13}\text{C NMR}$  (101 MHz,  $\text{CDCl}_3$ )  $\delta$  158.5, 157.4, 157.1, 140.8, 137.7, 137.0, 133.6, 130.6, 129.4, 127.5, 126.7, 126.3, 125.0, 121.8, 121.8, 120.1, 119.0, 117.0, 115.1, 111.9, 110.9, 55.4, 20.4. HR-MS (ESI)  $m/z$  calcd for  $\text{C}_{24}\text{H}_{20}\text{N}_3\text{O}^+[\text{M}+\text{H}^+]$  366.1606, found 366.1671.

### 1-(benzo[d][1,3]dioxol-4-yl)-9-(pyrimidin-2-yl)-9H-carbazole (3j)

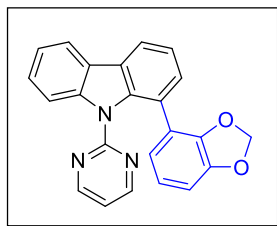

Yield (0.1 mmol scale, 27 mg, 27 %); white solid (hexane/ethyl acetate = 9.1:1.0, V/V).  $^1\text{H NMR}$  (400 MHz, Chloroform-*d*)  $\delta$  8.43 (d,  $J = 4.8$  Hz, 2H), 8.13 – 8.04 (m, 3H), 7.49 – 7.33 (m, 4H), 6.93 (t,  $J = 4.8$  Hz, 1H), 6.80 – 6.71 (m, 2H), 6.56 (d,  $J = 8.0$  Hz, 1H), 5.87 (s, 2H).  $^{13}\text{C NMR}$  (101 MHz, Chloroform-*d*)  $\delta$  157.82, 157.40, 147.49, 146.11, 140.97, 137.15, 135.48, 128.50, 128.09, 126.95, 126.84, 125.15, 122.36, 122.09, 121.32, 120.19, 119.15, 117.11, 112.20, 108.35, 108.02, 100.95. HR-MS (ESI)  $m/z$  calcd for  $\text{C}_{23}\text{H}_{15}\text{N}_3\text{O}_2 + [\text{M} + \text{H}^+]$  366.1243, found 366.1237.

### 1-(4-methoxy-3-methylphenyl)-9-(pyrimidin-2-yl)-9H-carbazole (3k)

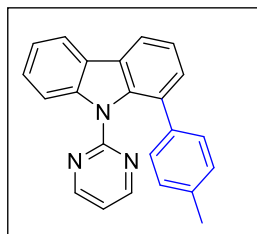

Yield (0.1 mmol scale, 23 mg, 69 %); white solid (hexane/ethyl acetate = 9.1:1.0, V/V).  $^1\text{H NMR}$  (400 MHz,  $\text{CDCl}_3$ )  $\delta$  8.34 (d,  $J = 4.8$  Hz, 2H), 8.16 – 8.10 (m, 3H), 7.50 – 7.45 (m, 3H), 7.38 (s, 1H), 7.17 (d,  $J = 8.0$  Hz, 2H), 6.92 (d,  $J = 7.8$  Hz, 2H), 6.84 (t,  $J = 4.8$  Hz, 1H), 2.28 (s, 3H).  $^{13}\text{C NMR}$  (101 MHz,  $\text{CDCl}_3$ )  $\delta$  157.21, 156.83, 140.47, 137.97, 136.75, 135.33, 128.26, 128.15, 128.06, 127.00, 126.41, 126.28, 124.73, 121.88, 121.54, 119.69, 118.57, 116.38, 111.72, 20.67. HR-MS (ESI)  $m/z$  calcd for  $\text{C}_{23}\text{H}_{18}\text{N}_3 + [\text{M} + \text{H}^+]$  336.1501, found 336.1492.

### 1-(4-methoxy-3-methylphenyl)-9-(pyrimidin-2-yl)-9H-carbazole (3l)

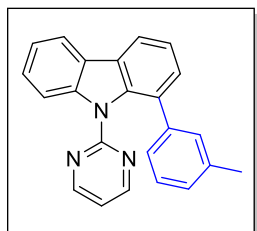

Yield (0.1 mmol scale, 23 mg, 69 %); white solid (hexane/ethyl acetate = 9.1:1.0, V/V).  $^1\text{H NMR}$  (400 MHz,  $\text{CDCl}_3$ )  $\delta$  8.25 (d,  $J = 4.8$  Hz, 2H), 8.04 (ddd,  $J = 14.4, 4.8, 3.8$  Hz, 3H), 7.42 – 7.36 (m, 3H), 7.31 – 7.27 (m, 1H), 7.05 (d,  $J = 7.6$  Hz, 1H), 6.96 (dd,  $J = 12.2, 4.4$  Hz, 2H), 6.83 – 6.80 (m, 1H), 6.76 (t,  $J = 4.8$  Hz, 1H), 2.07 (s, 3H).  $^{13}\text{C NMR}$  (101 MHz,  $\text{CDCl}_3$ )  $\delta$  157.52 (s), 157.15 (s), 141.05 (s), 140.72 (s), 137.45 (s), 136.97 (s), 128.49 (s), 128.35 (s), 128.28 (s), 128.02 (s), 126.85 (s), 126.66 (s), 125.43 (s), 124.99 (s), 124.74 (s), 122.20 (s), 121.89 (s), 120.08 (s), 119.10 (s), 116.99 (s), 111.91 (s), 21.08 (s). HR-MS (ESI)  $m/z$  calcd for  $\text{C}_{23}\text{H}_{18}\text{N}_3 + [\text{M} + \text{H}^+]$  336.1501, found 336.1492.

### 1-(4-Methoxyphenyl)-9-(pyrimidin-2-yl)-9H-carbazole (3m)

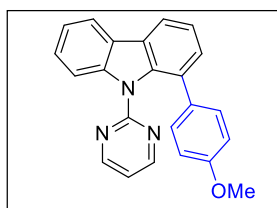

Yield (0.1 mmol scale, 30 mg, 85 %); white solid (hexane/ethyl acetate = 9.1:1.0, V/V).  $^1\text{H NMR}$  (400 MHz, Chloroform-*d*)  $\delta$  8.36 (d,  $J = 4.8$  Hz, 2H), 8.14 (m, 2H), 8.09 (dd,  $J = 6.1, 2.8$  Hz, 1H), 7.49 (m, 3H), 7.40 (m, 1H), 7.18 (d,  $J = 8.8$  Hz, 2H), 6.87 (t,  $J = 4.8$  Hz, 1H), 6.65 (d,  $J = 8.8$  Hz, 2H), 3.76 (s, 3H).  $^{13}\text{C NMR}$  (101 MHz, Chloroform-*d*)  $\delta$  158.26, 157.68, 157.32, 141.02, 137.23, 133.99, 128.68, 128.63, 128.24, 126.96, 126.78, 125.24, 122.40, 122.06, 120.18, 118.92, 117.01, 113.62, 112.25, 55.51. HR-MS (ESI)  $m/z$  calcd for  $\text{C}_{23}\text{H}_{18}\text{N}_3\text{O} + [\text{M} + \text{H}^+]$  352.1450, found 352.1442.

### 1-(4-(Methylthio)phenyl)-9-(pyrimidin-2-yl)-9H-carbazole (3n)

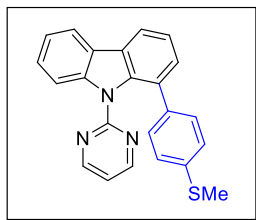

Yield (0.1 mmol scale, 30 mg, 82 %); white solid (hexane/ethyl acetate = 9.1:1.0, V/V).  $^1\text{H NMR}$  (400 MHz, Chloroform-*d*)  $\delta$  8.36 (d,  $J = 4.8$  Hz, 2H), 8.18 – 8.01 (m, 3H), 7.50 – 7.40 (m, 3H), 7.36 (m, 1H), 7.20 – 7.15 (m, 2H), 6.87 (t,  $J = 4.8$  Hz, 1H), 6.68 – 6.61 (m, 2H), 3.76 (s, 3H).  $^{13}\text{C NMR}$  (101 MHz, Chloroform-*d*)  $\delta$  158.26, 157.68, 157.32, 141.02, 137.23, 133.99, 128.68, 128.63, 128.24, 126.96, 126.78, 125.24, 122.40, 122.06, 120.18, 118.92, 117.02, 113.62, 112.24, 55.51. **HR-MS** (ESI)  $m/z$  calcd for  $\text{C}_{22}\text{H}_{15}\text{N}_4\text{O}_2^+[\text{M}+\text{H}^+]$  368.1221, found 368.1223.

### 1-(naphthalen-1-yl)-9-(pyrimidin-2-yl)-9H-carbazole (3o)

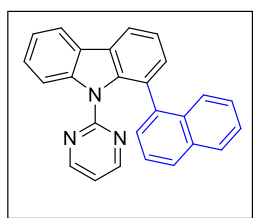

Yield (0.1 mmol scale, 26 mg, 70 %); white solid (hexane/ethyl acetate = 9.1:1.0, V/V).  $^1\text{H NMR}$  (400 MHz, Chloroform-*d*)  $\delta$  8.22 (dd,  $J = 7.6, 1.4$  Hz, 1H), 8.20 – 8.15 (m, 1H), 7.95 – 7.88 (m, 1H), 7.84 (d,  $J = 4.8$  Hz, 2H), 7.70 (dd,  $J = 13.7, 7.9$  Hz, 2H), 7.62 (d,  $J = 8.0$  Hz, 1H), 7.57 (dd,  $J = 7.4, 1.4$  Hz, 1H), 7.51 (t,  $J = 7.5$  Hz, 1H), 7.45 – 7.28 (m, 7H), 6.50 (t,  $J = 4.8$  Hz, 1H).  $^{13}\text{C NMR}$  (101 MHz, Chloroform-*d*)  $\delta$  157.09, 156.39, 140.62, 139.26, 137.97, 133.45, 130.97, 129.94, 127.67, 127.12, 126.80, 126.65, 126.51, 126.37, 126.21, 126.13, 125.77, 125.43, 124.83, 121.86, 120.13, 119.63, 116.74, 111.98. **HR-MS** (ESI)  $m/z$  calcd for  $\text{C}_{26}\text{H}_{18}\text{N}_3^+[\text{M}+\text{H}^+]$  372.1501, found 372.1497.

### 1-(dibenzo[*b,d*]furan-3-yl)-9-(pyrimidin-2-yl)-9H-carbazole (3q)

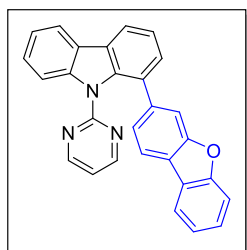

Yield (0.1 mmol scale, 26 mg, 70 %); white solid (hexane/ethyl acetate = 9.1:1.0, V/V).  $^1\text{H NMR}$  (400 MHz,  $\text{CDCl}_3$ )  $\delta$  8.16 (dd,  $J = 9.4, 3.9$  Hz, 4H), 8.08 (d,  $J = 8.2$  Hz, 1H), 7.85 (dd,  $J = 11.0, 4.6$  Hz, 2H), 7.57 (dd,  $J = 12.4, 4.8$  Hz, 2H), 7.50 – 7.44 (m, 3H), 7.42 – 7.38 (m, 2H), 7.32 (dd,  $J = 7.8, 4.7$  Hz, 2H), 6.54 (t,  $J = 4.8$  Hz, 1H).  $^{13}\text{C NMR}$  (101 MHz,  $\text{CDCl}_3$ )  $\delta$  157.5, 157.1, 156.4, 154.7, 140.8, 137.2, 136.0, 128.8, 128.0, 127.2, 127.0, 126.8, 126.7, 124.9, 123.9, 13.8, 122.8, 122.2, 121.9, 120.7, 120.1, 119.6, 119.1, 116.93, 111.9, 111.6, 111.0. **HR-MS** (ESI)  $m/z$  calcd for  $\text{C}_{28}\text{H}_{18}\text{N}_3\text{O}^+[\text{M}+\text{H}^+]$  412.1450, found 412.1453.

### 7-methyl-1-phenyl-9-(pyrimidin-2-yl)-9H-carbazole (4a)

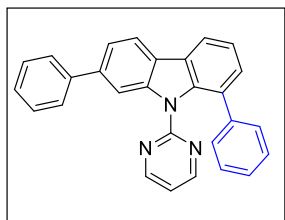

Yield (0.1 mmol scale, 30 mg, 75 %); white solid (hexane/ethyl acetate = 9.1:1.0, V/V).  $^1\text{H NMR}$  (400 MHz,  $\text{CDCl}_3$ )  $\delta$  8.36 – 8.35 (m, 1H), 8.33 (d,  $J = 4.8$  Hz, 2H), 8.18 (dd,  $J = 8.1, 0.5$  Hz, 1H), 8.13 (dd,  $J = 6.9, 2.1$  Hz, 1H), 7.72 – 7.69 (m, 2H), 7.61 (dd,  $J = 8.1, 1.6$  Hz, 1H), 7.49 – 7.44 (m, 4H), 7.38 – 7.34 (m, 1H), 7.29 (ddd,  $J = 5.6, 4.9, 2.9$  Hz, 2H), 7.13 – 7.08 (m, 3H), 6.83 (t,  $J = 4.8$  Hz, 1H).  $^{13}\text{C NMR}$  (101 MHz,  $\text{CDCl}_3$ )  $\delta$  157.5, 157.3, 142.0, 141.4, 141.2, 140.2, 137.5, 128.7, 128.6, 128.4, 128.0, 127.6, 127.5, 127.1,

126.6, 126.1, 124.3, 122.4, 121.6, 120.3, 119.2, 117.0, 110.8. **HR-MS** (ESI)  $m/z$  calcd for  $C_{28}H_{20}N_3^+[M+H^+]$  398.1657, found 398.1665.

#### 7-(4-isopropylphenyl)-1-phenyl-9-(pyrimidin-2-yl)-9H-carbazole (4b)

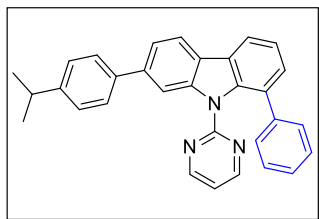

Yield (0.1 mmol scale, 35 mg, 79 %); white solid (hexane/ethyl acetate = 9.1:1.0, V/V).  **$^1H$  NMR** (400 MHz,  $CDCl_3$ )  $\delta$  8.37 – 8.30 (m, 3H), 8.15 (ddd,  $J$  = 15.6, 7.4, 1.3 Hz, 2H), 7.66 – 7.59 (m, 3H), 7.49 (td,  $J$  = 7.1, 4.2 Hz, 2H), 7.36 – 7.28 (m, 4H), 7.14 – 7.05 (m, 3H), 6.82 (t,  $J$  = 4.8 Hz, 1H), 2.96 (dq,  $J$  = 13.8, 6.9 Hz, 1H), 1.31 (d,  $J$  = 6.9 Hz, 6H).  **$^{13}C$  NMR** (101 MHz,  $CDCl_3$ )  $\delta$  157.5, 157.3, 147.9, 141.4, 141.3, 140.2, 139.6, 137.5, 128.9, 128.5, 128.4, 128.0, 127.5, 126.8, 126.7, 126.1, 124.1, 122.4, 121.6, 120.2, 119.2, 116.9, 110.7, 33.8, 24.1. **HR-MS** (ESI)  $m/z$  calcd for  $C_{31}H_{26}N_3^+[M+H^+]$  440.5700, found 440.5704.

#### 1-phenyl-9-(pyrimidin-2-yl)-7-(p-tolyl)-9H-carbazole (4c)

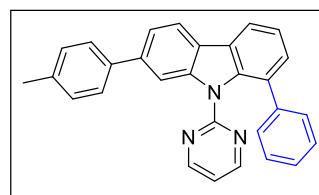

Yield (0.1 mmol scale, 33 mg, 80 %); white solid (hexane/ethyl acetate = 9.1:1.0, V/V).  **$^1H$  NMR** (400 MHz,  $CDCl_3$ )  $\delta$  8.35 – 8.31 (m, 3H), 8.17 – 8.11 (m, 2H), 7.62 – 7.58 (m, 3H), 7.50 – 7.45 (m, 2H), 7.32 – 7.26 (m, 4H), 7.13 – 7.07 (m, 3H), 6.82 (t,  $J$  = 4.8 Hz, 1H), 2.41 (s, 3H).  **$^{13}C$  NMR** (101 MHz,  $CDCl_3$ )  $\delta$  157.5, 157.3, 141.4, 141.3, 140.2, 139.2, 137.5, 136.9, 129.4, 128.5, 128.4, 128.0, 127.5, 127.4, 126.7, 126.1, 124.1, 122.4, 121.5, 120.2, 119.1, 117.0, 110.6, 21.1. **HR-MS** (ESI)  $m/z$  calcd for  $C_{29}H_{22}N_3^+[M+H^+]$  411.1735, found 412.1724.

#### 7-(4-methoxyphenyl)-1-phenyl-9-(pyrimidin-2-yl)-9H-carbazole (4d)

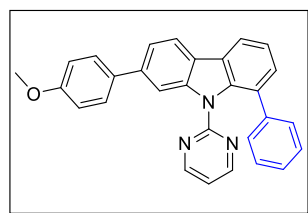

Yield (0.1 mmol scale, 30 mg, 71 %); white solid (hexane/ethyl acetate = 9.1:1.0, V/V).  **$^1H$  NMR** (400 MHz,  $CDCl_3$ )  $\delta$  8.31 – 8.23 (m, 3H), 8.16 – 8.08 (m, 2H), 7.56 (dd,  $J$  = 8.0, 1.5 Hz, 1H), 7.49 – 7.42 (m, 3H), 7.35 – 7.27 (m, 3H), 7.12 – 6.97 (m, 5H), 6.76 (t,  $J$  = 4.8 Hz, 1H), 3.79 (s, 3H).  **$^{13}C$  NMR** (101 MHz,  $CDCl_3$ )  $\delta$  157.5, 157.2, 156.7, 141.4, 141.0, 137.4, 131.6, 131.4, 128.5, 128.5, 128.0, 127.5, 126.8, 126.0, 124.0, 123.9, 122.3, 120.8, 119.3, 119.1, 116.8, 113.1, 111.4, 55.7. **HR-MS** (ESI)  $m/z$  calcd for  $C_{29}H_{22}N_3O^+[M+H^+]$  428.1763, found 428.1751.

#### 6-phenyl-5-(pyrimidin-2-yl)-5H-[1,3]dioxolo[4,5-b]carbazole (4e)

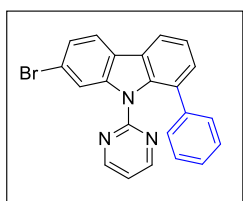

Yield (0.1 mmol scale, 30 mg, 75%); white solid (hexane/ethyl acetate = 9.1:1.0, V/V).  **$^1H$  NMR** (400 MHz,  $CDCl_3$ )  $\delta$  8.24 (t,  $J$  = 3.3 Hz, 3H), 8.00 (dd,  $J$  = 7.4, 1.5 Hz, 1H), 7.90 (d,  $J$  = 8.3 Hz, 1H), 7.41 (ddd,  $J$  = 7.4, 6.3, 4.8 Hz, 3H), 7.17 – 7.13 (m, 2H), 7.04 – 6.99 (m, 3H), 6.77 (t,  $J$  = 4.8 Hz, 1H).  **$^{13}C$  NMR** (101 MHz,  $CDCl_3$ )  $\delta$  157.3, 157.1, 141.4, 141.0, 137.0, 129.0, 128.6, 128.0, 127.5, 126.2, 126.1, 125.1, 124.0, 122.6, 121.2, 120.2, 119.1, 117.3, 115.4. **HR-MS** (ESI)  $m/z$  calcd for  $C_{22}H_{15}BrN_3^+[M+H^+]$  399.0460, found 400.0471



### 7-chloro-1-phenyl-9-(pyrimidin-2-yl)-9H-carbazole (4f)

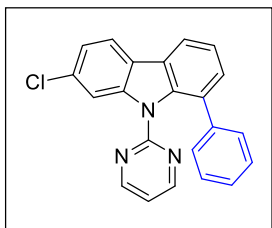

Yield (0.1 mmol scale, 25 mg, 71 %); white solid (hexane/ethyl acetate = 9.1:1.0, V/V).  $^1\text{H NMR}$  (400 MHz, Chloroform-*d*)  $\delta$  8.32 (d,  $J = 4.8$  Hz, 2H), 8.15 (d,  $J = 1.8$  Hz, 1H), 8.07 (dd,  $J = 7.2, 1.8$  Hz, 1H), 8.03 (d,  $J = 8.3$  Hz, 1H), 7.53 – 7.43 (m, 2H), 7.34 (dd,  $J = 8.3, 1.9$  Hz, 1H), 7.24 (dd,  $J = 7.7, 1.9$  Hz, 2H), 7.14 – 7.05 (m, 3H), 6.86 (t,  $J = 4.8$  Hz, 1H).  $^{13}\text{C NMR}$  (101 MHz, Chloroform-*d*)  $\delta$  157.46, 157.22, 141.38, 141.15, 137.32, 132.50, 129.01, 128.72, 128.16, 127.63, 126.33, 126.21, 122.76, 122.56, 120.98, 119.25, 117.37, 112.67. **HR-MS** (ESI)  $m/z$  calcd for  $\text{C}_{22}\text{H}_{15}\text{ClN}_3^+[\text{M}+\text{H}^+]$  356.0955, found 356.0949.

### 7-methoxy-1-phenyl-9-(pyrimidin-2-yl)-9H-carbazole (4g)

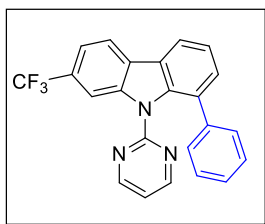

Yield (0.1 mmol scale, 31 mg, 80 %); white solid (hexane/ethyl acetate = 9.1:1.0, V/V).  $^1\text{H NMR}$  (400 MHz,  $\text{CDCl}_3$ )  $\delta$  8.33 (s, 1H), 8.22 (d,  $J = 4.8$  Hz, 2H), 8.13 – 8.02 (m, 2H), 7.53 (dd,  $J = 8.1, 0.7$  Hz, 1H), 7.47 – 7.36 (m, 2H), 7.17 – 7.11 (m, 2H), 7.04 – 6.96 (m, 3H), 6.75 (t,  $J = 4.8$  Hz, 1H).  $^{13}\text{C NMR}$  (101 MHz,  $\text{CD}_2\text{Cl}_2$ )  $\delta$  155.50 (s), 155.1, 138.9, 138.1, 136.0, 127.9, 126.8, 126.7, 126.4, 126.2, 125.8, 125.6, 124.4, 123.7, 120.8, 118.46, 117.8, 116.8 (d,  $J = 3.6$  Hz), 115.5 (s), 107.8 (d,  $J = 4.2$  Hz). **HR-MS** (ESI)  $m/z$  calcd for  $\text{C}_{23}\text{H}_{15}\text{F}_3\text{N}_3^+[\text{M}+\text{H}^+]$  390.1218, found 390.1204.

### 7-methyl-1-phenyl-9-(pyrimidin-2-yl)-9H-carbazole (4h)

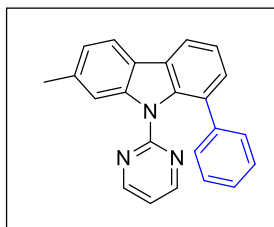

Yield (0.1 mmol scale, 20 mg, 61 %); white solid (hexane/ethyl acetate = 9.1:1.0, V/V).  $^1\text{H NMR}$  (400 MHz,  $\text{CDCl}_3$ )  $\delta$  8.32 (d,  $J = 4.8$  Hz, 2H), 8.06 (dd,  $J = 6.2, 2.7$  Hz, 1H), 8.00 (d,  $J = 7.9$  Hz, 1H), 7.95 – 7.90 (m, 1H), 7.46 – 7.41 (m, 2H), 7.27 (dd,  $J = 2.8, 0.9$  Hz, 1H), 7.26 – 7.24 (m, 1H), 7.19 (ddd,  $J = 7.9, 1.3, 0.5$  Hz, 1H), 7.13 – 7.03 (m, 3H), 6.82 (t,  $J = 4.8$  Hz, 1H), 2.52 (s, 3H).  $^{13}\text{C NMR}$  (101 MHz,  $\text{CDCl}_3$ )  $\delta$  157.5, 157.2, 141.4, 141.2, 136.98, 137.0, 128.9, 128.3, 128.1, 127.5, 126.9, 126.0, 123.3, 122.7, 122.2, 119.7, 118.9, 116.9, 112.2, 22.2. **HR-MS** (ESI)  $m/z$  calcd for  $\text{C}_{22}\text{H}_{18}\text{N}_3^+[\text{M}+\text{H}^+]$  336.1501, found 336.1504.

### 7-methoxy-1-phenyl-9-(pyrimidin-2-yl)-9H-carbazole (4i)

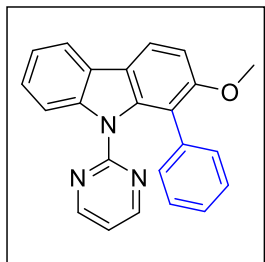

Yield (0.1 mmol scale, 25 mg, 72 %); white solid (hexane/ethyl acetate = 9.1:1.0, V/V).  $^1\text{H NMR}$  (400 MHz,  $\text{CDCl}_3$ )  $\delta$  8.29 (t,  $J = 4.9$  Hz, 2H), 8.08 – 8.01 (m, 2H), 7.96 (dd,  $J = 7.3, 1.1$  Hz, 1H), 7.39 – 7.31 (m, 2H), 7.27 (d,  $J = 1.6$  Hz, 1H), 7.25 (q,  $J = 2.0$  Hz, 1H), 7.13 – 7.01 (m, 4H), 6.79 (t,  $J = 4.8$  Hz, 1H), 3.87 (s, 3H).  $^{13}\text{C NMR}$  (101 MHz,  $\text{CDCl}_3$ )  $\delta$  157.4, 157.3, 156.2, 141.2, 139.0, 136.3, 130.0, 127.6, 126.2, 125.6, 125.0, 122.0, 120.9,

119.9, 119.3, 117.0, 116.2, 111.8, 107.0, 56.8. **HR-MS** (ESI)  $m/z$  calcd for  $C_{23}H_{18}N_3O^+[M+H^+]$  352.1450, found 352.1465.

#### 6-phenyl-5-(pyrimidin-2-yl)-5H-[1,3]dioxolo[4,5-b]carbazole (4j)

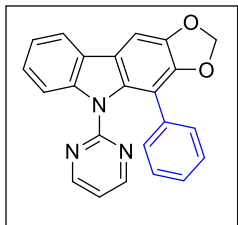

Yield (0.1 mmol scale, 27 mg, 75 %); white solid (hexane/ethyl acetate = 9.1:1.0, V/V).  **$^1H$  NMR** (400 MHz,  $CDCl_3$ )  $\delta$  8.29 (d,  $J = 4.8$  Hz, 2H), 8.10 (t,  $J = 7.7$  Hz, 2H), 7.46 – 7.41 (m, 1H), 7.34 (td,  $J = 7.4, 1.0$  Hz, 1H), 7.24 – 7.19 (m, 2H), 7.11 – 6.99 (m, 4H), 6.80 (t,  $J = 4.8$  Hz, 1H), 6.23 (d,  $J = 5.7$  Hz, 2H).  **$^{13}C$  NMR** (101 MHz,  $CDCl_3$ )  $\delta$  157.6, 157.2, 143.3, 141.5, 141.2, 140.4, 133.5, 128.0, 127.6, 126.8, 125.82, 122.4, 122.3, 122.1, 120.8, 116.8, 111.9, 111.3, 109.2, 102.0. **HR-MS** (ESI)  $m/z$  calcd for  $C_{23}H_{16}N_3O_2^+[M+H^+]$  366.1243, found 366.1237.

#### 7-methoxy-1-phenyl-9-(pyrimidin-2-yl)-9H-carbazole (4k)

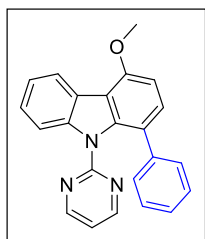

Yield (0.1 mmol scale, 25 mg, 72 %); white solid (hexane/ethyl acetate = 9.1:1.0, V/V).  **$^1H$  NMR** (400 MHz,  $CDCl_3$ )  $\delta$  8.44 (dd,  $J = 7.6, 0.7$  Hz, 1H), 8.33 (d,  $J = 4.8$  Hz, 2H), 8.08 (d,  $J = 8.1$  Hz, 1H), 7.45 – 7.35 (m, 3H), 7.23 (dd,  $J = 8.0, 1.5$  Hz, 2H), 7.11 – 7.02 (m, 3H), 6.94 (d,  $J = 8.3$  Hz, 1H), 6.83 (t,  $J = 4.8$  Hz, 1H), 4.16 (s, 3H).  **$^{13}C$  NMR** (101 MHz,  $CDCl_3$ )  $\delta$  157.49, 157.27, 155.55, 141.22, 140.04, 138.10, 129.23, 127.93, 127.54, 125.74, 125.55, 124.30, 123.19, 122.03, 121.27, 117.06, 115.62, 111.30, 103.45, 55.68. **HR-MS** (ESI)  $m/z$  calcd for  $C_{23}H_{18}N_3O^+[M+H^+]$  352.1450, found 352.1449.

#### (2-methoxy-9-(pyrimidin-2-yl)-9H-carbazol-1-yl)(phenyl)methanone (4l)

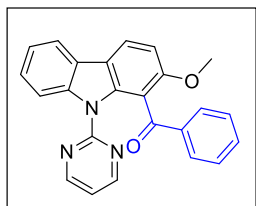

Yield (0.1 mmol scale, 25 mg, 72 %); white solid (hexane/ethyl acetate = 9.1:1.0, V/V).  **$^1H$  NMR** (400 MHz,  $CDCl_3$ )  $\delta$  8.53 (d,  $J = 8.2$  Hz, 1H), 8.16 (d,  $J = 4.8$  Hz, 2H), 8.12 (d,  $J = 8.6$  Hz, 1H), 8.01 (d,  $J = 7.2$  Hz, 1H), 7.97 – 7.90 (m, 2H), 7.52 (ddd,  $J = 6.6, 3.8, 1.2$  Hz, 1H), 7.42 (dt,  $J = 8.2, 4.5$  Hz, 3H), 7.35 (td,  $J = 7.5, 0.9$  Hz, 1H), 7.06 (d,  $J = 8.6$  Hz, 1H), 6.88 (t,  $J = 4.8$  Hz, 1H), 3.73 (s, 3H).  **$^{13}C$  NMR** (101 MHz,  $CDCl_3$ )  $\delta$  194.3, 157.2, 157.1, 157.0, 139.9, 139.3, 137.0, 131.8, 129.0, 127.9, 126.0, 125.2, 122.4, 121.6, 121.0, 118.8, 117.1, 115.8, 114.6, 107.1, 56.7. **HR-MS** (ESI)  $m/z$  calcd for  $C_{24}H_{18}N_3O_2^+[M+H^+]$  380.1399, found 380.1389.

#### (4-methoxy-9-(pyrimidin-2-yl)-9H-carbazol-1-yl)(phenyl)methanone (4m)

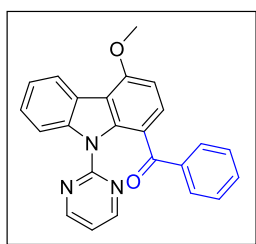

Yield (0.1 mmol scale, 25 mg, 72 %); white solid (hexane/ethyl acetate = 9.1:1.0, V/V).  **$^1H$  NMR** (400 MHz,  $CDCl_3$ )  $\delta$  8.45 (d,  $J = 4.8$  Hz, 2H), 8.40 (dd,  $J = 14.5, 7.9$  Hz, 2H), 7.80 – 7.69 (m, 2H), 7.55 (d,  $J = 8.4$  Hz, 1H), 7.48 – 7.33 (m, 5H), 6.94 (t,  $J = 4.8$  Hz, 1H), 6.85 (d,  $J = 8.4$  Hz, 1H), 4.16 (s, 3H).  **$^{13}C$  NMR** (101 MHz,  $CDCl_3$ )  $\delta$  195.0, 158.5, 158.2, 157.7, 139.4, 138.3, 138.0, 132.1, 129.8, 129.7, 128.1, 126.2, 124.2, 123.0, 122.5, 119.7,

117.5, 115.5, 113.1, 102.5, 55.8. **HR-MS** (ESI)  $m/z$  calcd for  $C_{24}H_{18}N_3O_2^+[M+H^+]$  380.1399, found 380.1401.

### 3-methyl-1,8-diphenyl-9-(pyrimidin-2-yl)-9H-carbazole (4n)

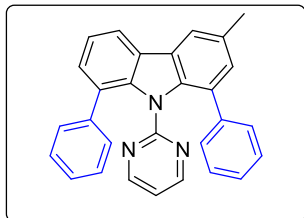

Yield (0.1 mmol scale, 34 mg, 84 %); white solid (hexane/ethyl acetate = 9.1:1.0, V/V).  **$^1H$  NMR** (400 MHz, Chloroform-*d*)  $\delta$  8.17 (dd,  $J = 7.7$ , 1.3 Hz, 1H), 8.02 – 7.94 (m, 1H), 7.76 (d,  $J = 4.8$  Hz, 2H), 7.36 (t,  $J = 7.5$  Hz, 1H), 7.29 (dd,  $J = 7.3$ , 1.3 Hz, 1H), 7.15 – 7.12 (m, 1H), 6.94 (d,  $J = 2.1$  Hz, 10H), 6.51 (t,  $J = 4.9$  Hz, 1H), 2.57 (s, 3H).  **$^{13}C$  NMR** (101 MHz, Chloroform-*d*)  $\delta$  157.66, 156.45, 140.54, 137.62, 135.78, 130.81, 130.09, 129.33, 128.44, 128.42, 127.67, 127.66, 126.92, 126.64, 125.71, 125.20, 124.95, 120.56, 119.42, 119.35, 118.01, 21.36. **HR-MS** (ESI)  $m/z$  calcd for  $C_{29}H_{22}N_3^+[M+H^+]$  412.1814, found 412.1819.

### 3,6-dimethoxy-1,8-diphenyl-9-(pyrimidin-2-yl)-9H-carbazole (4o)

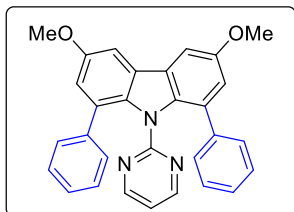

Yield (0.1 mmol scale, 36 mg, 78 %); white solid (hexane/ethyl acetate = 9.1:1.0, V/V).  **$^1H$  NMR** (400 MHz, Chloroform-*d*)  $\delta$  8.02 (d,  $J = 8.5$  Hz, 2H), 7.74 (d,  $J = 4.9$  Hz, 2H), 7.01 (d,  $J = 8.6$  Hz, 2H), 6.94 – 6.87 (m, 10H), 6.43 (t,  $J = 4.9$  Hz, 1H), 3.75 (s, 6H).  **$^{13}C$  NMR** (101 MHz, Chloroform-*d*)  $\delta$  157.71, 156.75, 155.94, 139.77, 135.09, 130.47, 127.44, 125.81, 119.21, 118.92, 118.19, 115.34, 105.94, 56.97. **HR-MS** (ESI)  $m/z$  calcd for  $C_{30}H_{24}N_3O_2^+[M+H^+]$  458.1869, found 458.1851.

### 3-methoxy-1,8-diphenyl-9-(pyrimidin-2-yl)-9H-carbazole (4p)

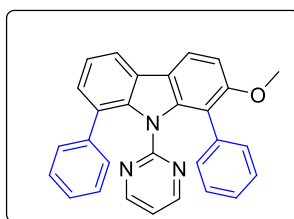

Yield (0.1 mmol scale, 36 mg, 78 %); white solid (hexane/ethyl acetate = 9.1:1.0, V/V).  **$^1H$  NMR**  $\delta$  8.20 – 8.06 (m, 2H), 7.76 (d,  $J = 4.8$  Hz, 2H), 7.35 (t,  $J = 7.6$  Hz, 1H), 7.22 (dd,  $J = 7.4$ , 1.2 Hz, 1H), 7.07 (d,  $J = 8.6$  Hz, 1H), 6.99 – 6.90 (m, 10H), 6.48 (t,  $J = 4.8$  Hz, 1H), 3.80 (s, 3H).  **$^{13}C$  NMR** (101 MHz,  $CDCl_3$ )  $\delta$  157.0, 156.1, 156.1, 139.8, 138.6, 137.5, 134.7, 129.8, 128.0, 128.0, 127.1, 127.0, 126.3, 125.4, 125.2, 124.5, 120.3, 119.4, 118.7, 118.1, 117.6, 114.6, 105.5, 56.4. **HR-MS** (ESI)  $m/z$  calcd for  $C_{30}H_{24}N_3O_2^+[M+H^+]$  428.1763, found 428.1751.

### 2-chloro-1,8-diphenyl-9-(pyrimidin-2-yl)-9H-carbazole (4q)

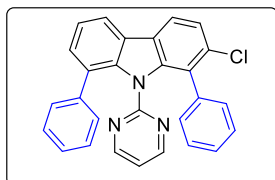

Yield (0.1 mmol scale, 31 mg, 72 %); white solid (hexane/ethyl acetate = 9.1:1.0, V/V).  **$^1H$  NMR** (400 MHz, Chloroform-*d*)  $\delta$  8.16 (dd,  $J = 7.8$ , 1.3 Hz, 1H), 8.12 (d,  $J = 8.3$  Hz, 1H), 7.79 (d,  $J = 4.9$  Hz, 2H), 7.47 (d,  $J = 8.3$  Hz, 1H), 7.38 (t,  $J = 7.6$  Hz, 1H), 7.28 (dd,  $J = 7.4$ , 1.3 Hz, 1H), 7.05 – 6.88 (m, 10H), 6.49 (t,  $J = 4.9$  Hz, 1H).  **$^{13}C$  NMR** (101 MHz, Chloroform-*d*)  $\delta$  157.36, 156.81, 139.79, 138.84, 138.23, 136.36, 132.46, 130.20, 129.70, 128.67,

127.68, 127.62, 127.19, 126.68, 125.90, 125.04, 124.25, 123.65, 122.31, 121.14, 120.13, 119.32, 118.47. **HR-MS** (ESI)  $m/z$  calcd for  $C_{28}H_{19}ClN_3^+[M+H^+]$  432.1268, found 432.1256.

### 2-bromo-1,8-diphenyl-9-(pyrimidin-2-yl)-9H-carbazole (4r)

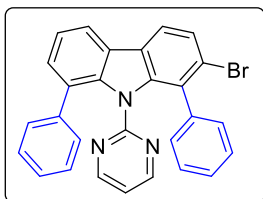

Yield (0.1 mmol scale, 40 mg, 86 %); white solid (hexane/ethyl acetate = 9.1:1.0, V/V).  **$^1H$  NMR** (400 MHz,  $CDCl_3$ )  $\delta$  8.17 (dd,  $J = 7.8, 1.3$  Hz, 1H), 8.06 (d,  $J = 8.3$  Hz, 1H), 7.79 (d,  $J = 4.9$  Hz, 2H), 7.66 (d,  $J = 8.3$  Hz, 1H), 7.38 (t,  $J = 7.6$  Hz, 1H), 7.28 (dd,  $J = 7.4, 1.3$  Hz, 1H), 7.04 – 6.89 (m, 10H), 6.49 (t,  $J = 4.9$  Hz, 1H).  **$^{13}C$  NMR** (101 MHz,  $CDCl_3$ )  $\delta$  157.3, 156.7, 139.6, 138.8, 138.1, 138.0, 130.1, 129.7, 128.6, 127.5, 127.5, 127.1, 126.7, 126.6, 125.8, 125.2, 124.1, 124.1, 123.1, 121.0, 120.4, 119.2, 118.4. **HR-MS** (ESI)  $m/z$  calcd for  $C_{30}H_{22}Cl_2N_3^+[M+H^+]$  494.1191, found 494.1183.

### 1,8-diphenyl-9-(pyrimidin-2-yl)-9H-carbazole (3s)

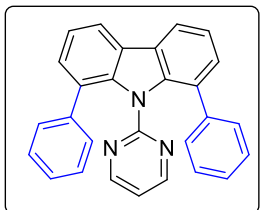

Yield (0.1 mmol scale, 32 mg, 80 %); white solid (hexane/ethyl acetate = 9.1:1.0, V/V).  **$^1H$  NMR** (400 MHz, Chloroform- $d$ )  $\delta$  8.21 (dd,  $J = 7.7, 1.3$  Hz, 2H), 7.78 (d,  $J = 4.8$  Hz, 2H), 7.38 (t,  $J = 7.5$  Hz, 2H), 7.31 (dd,  $J = 7.4, 1.4$  Hz, 2H), 7.01 – 6.92 (m, 10H), 6.52 (t,  $J = 4.9$  Hz, 1H).  **$^{13}C$  NMR** (101 MHz, Chloroform- $d$ )  $\delta$  156.33, 140.31, 137.23, 129.36, 128.31, 127.53, 126.83, 125.59, 124.84, 120.57, 119.28, 118.00. **HR-MS** (ESI)  $m/z$  calcd for  $C_{28}H_{20}N_3^+[M+H^+]$  398.1657, found 398.1652.

### 1,8-bis(4-fluorophenyl)-9-(pyrimidin-2-yl)-9H-carbazole (3t)

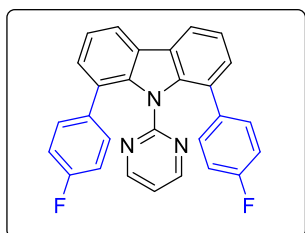

Yield (0.1 mmol scale, 34 mg, 78 %); white solid (hexane/ethyl acetate = 9.1:1.0, V/V).  **$^1H$  NMR** (400 MHz, Chloroform- $d$ )  $\delta$  8.23 – 8.15 (m, 2H), 7.90 (d,  $J = 4.8$  Hz, 2H), 7.35 (d,  $J = 7.6$  Hz, 2H), 7.25 (d,  $J = 5.7$  Hz, 2H), 6.89 (m, 4H), 6.72 – 6.58 (m, 5H).  **$^{13}C$  NMR** (101 MHz, Chloroform- $d$ )  $\delta$  162.47, 160.03, 157.86, 156.78, 137.60, 136.34, 136.31, 130.11, 130.03, 129.59, 125.86, 124.99, 120.86, 119.69, 118.31, 114.60, 114.39. **HR-MS** (ESI)  $m/z$  calcd for  $C_{28}H_{18}F_2N_3^+[M+H^+]$  434.1469, found 434.1462.

### 1,8-bis(3-bromophenyl)-9-(pyrimidin-2-yl)-9H-carbazole (3u)

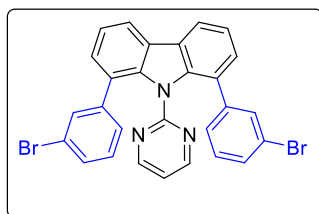

Yield (0.1 mmol scale, 42 mg, 76 %); white solid (hexane/ethyl acetate = 9.1:1.0, V/V).  **$^1H$  NMR** (400 MHz, Chloroform- $d$ )  $\delta$  8.22 (dd,  $J = 7.7, 1.2$  Hz, 2H), 8.00 (d,  $J = 4.9$  Hz, 2H), 7.39 (t,  $J = 7.6$  Hz, 2H), 7.29 (dd,  $J = 7.4, 1.2$  Hz, 2H), 7.14 (m, 3H), 7.06 – 6.81 (m, 5H), 6.68 (t,  $J = 4.8$  Hz, 1H).  **$^{13}C$  NMR** (101 MHz, Chloroform- $d$ )  $\delta$  157.52, 156.87, 142.25, 137.10, 131.80, 129.43, 129.38, 129.20, 127.34, 125.35, 124.93, 121.79, 120.90, 120.08, 119.07. **HR-MS** (ESI)  $m/z$  calcd for  $C_{28}H_{18}Br_2N_3^+[M+H^+]$  553.9867, found 553.9840.

### 1,8-bis(4-(methylthio)phenyl)-9-(pyrimidin-2-yl)-9H-carbazole (3v)

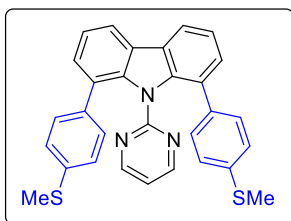

Yield (0.1 mmol scale, 43 mg, 88 %); white solid (hexane/ethyl acetate = 9.1:1.0, V/V).  $^1\text{H NMR}$  (400 MHz, Chloroform-*d*)  $\delta$  8.18 (d,  $J = 7.6$  Hz, 2H), 7.87 (d,  $J = 4.8$  Hz, 2H), 7.36 (t,  $J = 7.5$  Hz, 2H), 7.27 (d,  $J = 7.3$  Hz, 2H), 6.86 (d,  $J = 8.5$  Hz, 4H), 6.61 (t,  $J = 4.8$  Hz, 1H), 6.50 (d,  $J = 8.5$  Hz, 4H), 3.72 (s, 6H).  $^{13}\text{C NMR}$  (101 MHz, Chloroform-*d*)  $\delta$  157.95, 157.78, 156.48, 137.72, 132.96, 129.58, 129.52, 126.63, 124.99, 120.70, 119.21, 117.95, 113.25, 55.46. **HR-MS** (ESI)  $m/z$  calcd for  $\text{C}_{30}\text{H}_{24}\text{S}_2\text{N}_3^+[\text{M}+\text{H}^+]$  490.1412, found 490.1417.

### 1,8-bis(4-methoxyphenyl)-9-(pyrimidin-2-yl)-9H-carbazole (3w)

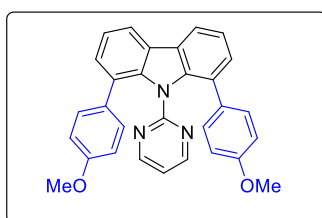

Yield (0.1 mmol scale, 38 mg, 83 %); white solid (hexane/ethyl acetate = 9.1:1.0, V/V).  $^1\text{H NMR}$  (400 MHz, Chloroform-*d*)  $\delta$  8.18 (dd,  $J = 7.7, 1.3$  Hz, 2H), 7.87 (d,  $J = 4.8$  Hz, 2H), 7.36 (t,  $J = 7.5$  Hz, 2H), 7.28 (dd,  $J = 7.3, 1.3$  Hz, 2H), 6.86 (d,  $J = 8.7$  Hz, 4H), 6.61 (t,  $J = 4.8$  Hz, 1H), 6.54 – 6.47 (m, 4H), 3.72 (s, 6H).  $^{13}\text{C NMR}$  (101 MHz, Chloroform-*d*)  $\delta$  157.77, 157.60, 156.29, 137.54, 132.78, 129.40, 129.34, 126.45, 124.81, 120.52, 119.03, 117.77, 113.07, 55.28. **HR-MS** (ESI)  $m/z$  calcd for  $\text{C}_{30}\text{H}_{24}\text{N}_3\text{O}_2^+[\text{M}+\text{H}^+]$  458.1869, found 458.1862.

### Methyl 2-(6-chloro-9-(pyrimidin-2-yl)-9H-carbazol-2-yl)propanoate (5)

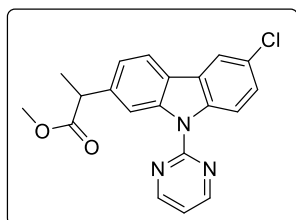

The title compound was prepared according to procedure **2.3**, White solid, Yield (2.0 mmol scale, 446 mg, 61 %); (hexane/ethyl acetate = 8.2:1.8, V/V). **m.p.**: 148-152 °C.  $^1\text{H NMR}$  (400 MHz,  $\text{CDCl}_3$ )  $\delta$  8.85 (d,  $J = 4.8$  Hz, 3H), 8.79 (d,  $J = 8.9$  Hz, 1H), 7.99 (d,  $J = 2.1$  Hz, 1H), 7.97 (d,  $J = 8.0$  Hz, 1H), 7.43 (dd,  $J = 9.0, 2.2$  Hz, 1H), 7.35 (dd,  $J = 8.0, 1.3$  Hz, 1H), 7.15 (t,  $J = 4.8$  Hz, 1H), 3.97 (q,  $J = 7.1$  Hz, 1H), 3.69 (s, 3H), 1.64 (d,  $J = 7.2$  Hz, 3H).  $^{13}\text{C NMR}$  (101 MHz,  $\text{CDCl}_3$ )  $\delta$  175.2, 158.9, 157.9, 140.1, 139.8, 137.7, 127.8, 126.9, 126.4, 123.9, 122.0, 119.8, 119.2, 117.6, 116.3, 115.8, 52.1, 46.2, 19.1. **HR-MS** (ESI)  $m/z$  calcd for  $\text{C}_{20}\text{H}_{17}\text{N}_3\text{O}_2^+[\text{M}+\text{H}^+]$  366.1009, found 366.1017.

### Caprofen derivatives (5a)

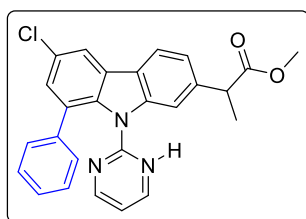

Yield (0.1 mmol scale, 33 mg, 72 %); white solid (hexane/ethyl acetate = 9.1:1.0, V/V).  $^1\text{H NMR}$  (400 MHz,  $\text{CDCl}_3$ )  $\delta$  8.31 (d,  $J = 4.8$  Hz, 2H), 8.03 (dd,  $J = 12.6, 10.5$  Hz, 3H), 7.44 (d,  $J = 2.0$  Hz, 1H), 7.33 (dd,  $J = 8.0, 1.1$  Hz, 1H), 7.22 (dd,  $J = 6.5, 2.9$  Hz, 2H), 7.12 – 7.06 (m, 3H), 6.84 (t,  $J = 4.8$  Hz, 1H), 3.89 (q,  $J = 7.1$  Hz, 1H), 3.65 (s, 3H), 1.58 (d,  $J = 7.1$  Hz, 3H).  $^{13}\text{C NMR}$  (101 MHz,  $\text{CDCl}_3$ )  $\delta$  175.0, 157.3, 157.1, 141.5, 140.2, 140.0, 135.7, 129.7, 128.2, 128.1, 127.8, 127.7, 127.4, 126.6, 123.2, 121.8, 120.4, 118.7, 117.2, 111.5, 52.1, 46.1, 19.0. **HR-MS** (ESI)  $m/z$  calcd for  $\text{C}_{26}\text{H}_{21}\text{N}_3\text{O}_2^+[\text{M}+\text{H}^+]$  442.1322, found 442.1334.

### 1-methoxy-2-methyl-4-nitrobenzene (7)

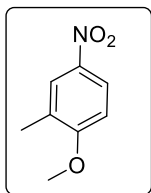

Yield (0.1 mmol scale, 27 mg, 76 %); white solid (hexane/ethyl acetate = 9.1:1.0, V/V). **<sup>1</sup>H NMR** (400 MHz, CDCl<sub>3</sub>) δ 8.10 (dd, *J* = 9.0, 2.7 Hz, 1H), 8.03 (dd, *J* = 2.8, 0.7 Hz, 1H), 6.86 (d, *J* = 9.0 Hz, 1H), 3.94 (s, 3H), 2.27 (s, 3H). **<sup>13</sup>C NMR** (101 MHz, CDCl<sub>3</sub>) δ 162.8, 140.9, 127.8, 125.9, 123.6, 109.2, 55.9, 16.2. **HR-MS** (ESI) *m/z* calcd for C<sub>8</sub>H<sub>10</sub>NO<sub>3</sub><sup>+</sup>[M+H<sup>+</sup>] 168.0661, found 168.0662.

### 4-methoxy-3-methylaniline (8)

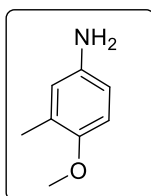

Yield (0.1 mmol scale, 27 mg, 76 %); white solid (hexane/ethyl acetate = 9.1:1.0, V/V). **<sup>1</sup>H NMR** (400 MHz, CDCl<sub>3</sub>) δ 6.64 (d, *J* = 8.4 Hz, 1H), 6.49 (ddd, *J* = 8.4, 5.8, 1.5 Hz, 2H), 3.73 (s, 3H), 3.35 (s, 2H), 2.15 (s, 3H). **<sup>13</sup>C NMR** (101 MHz, CDCl<sub>3</sub>) δ 150.7, 139.0, 127.2, 118.2, 112.7, 111.1, 55.5, 15.79. **HR-MS** (ESI) *m/z* calcd for C<sub>8</sub>H<sub>12</sub>NO<sup>+</sup>[M+H<sup>+</sup>] 138.0919, found 138.0910.

### Hyellazole isomer (10)

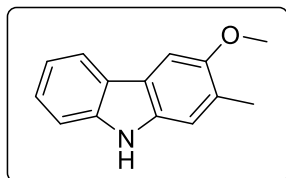

Yield (0.1 mmol scale, 27 mg, 76 %); white solid (hexane/ethyl acetate = 9.1:1.0, V/V). **<sup>1</sup>H NMR** (400 MHz, CDCl<sub>3</sub>) δ 8.37 (d, *J* = 4.8 Hz, 2H), 7.38 (dd, *J* = 8.7, 2.7 Hz, 1H), 7.31 – 7.24 (m, 1H), 7.16 (s, 1H), 6.82 (d, *J* = 8.7 Hz, 1H), 6.65 (t, *J* = 4.8 Hz, 1H), 3.83 (s, 3H), 2.24 (s, 3H). **<sup>13</sup>C NMR** (101 MHz, CDCl<sub>3</sub>) δ 152.75, 140.04, 134.36, 126.72, 125.33, 123.88, 121.59, 120.06, 119.18, 112.62, 110.96, 101.25, 56.25, 17.61. **HR-MS** (ESI) *m/z* calcd for C<sub>14</sub>H<sub>14</sub>NO<sup>+</sup>[M+H<sup>+</sup>] 212.1075, found 212.1075.

### Hyellazole isomer (11)

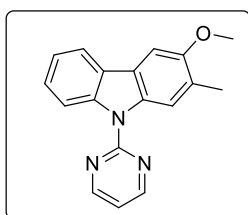

Yield (0.1 mmol scale, 27 mg, 76 %); white solid (hexane/ethyl acetate = 9.1:1.0, V/V). **<sup>1</sup>H NMR** (400 MHz, CDCl<sub>3</sub>) δ 8.79 – 8.70 (m, 3H), 8.58 (s, 1H), 7.91 (dd, *J* = 7.7, 0.5 Hz, 1H), 7.40 – 7.35 (m, 2H), 7.28 – 7.23 (m, 1H), 6.97 (t, *J* = 4.8 Hz, 1H), 3.90 (s, 3H), 2.36 (s, 3H). **<sup>13</sup>C NMR** (101 MHz, CDCl<sub>3</sub>) δ 159.16, 157.83, 154.15, 139.18, 133.39, 126.41, 126.10, 125.98, 124.26, 122.01, 118.99, 118.17, 116.42, 115.55, 100.07, 55.77, 17.54. **HR-MS** (ESI) *m/z* calcd for C<sub>18</sub>H<sub>16</sub>N<sub>3</sub>O<sup>+</sup>[M+H<sup>+</sup>] 290.1293, found 290.1295.

### Hyellazole isomer (12)

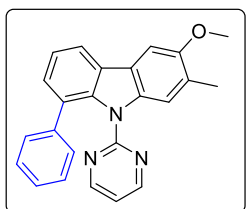

Yield (0.1 mmol scale, 27 mg, 76 %); white solid (hexane/ethyl acetate = 9.1:1.0, V/V). **<sup>1</sup>H NMR** (400 MHz, CDCl<sub>3</sub>) δ 8.22 (d, *J* = 4.8 Hz, 2H), 7.96 (dd, *J* = 6.5, 2.4 Hz, 1H), 7.87 (d, *J* = 0.4 Hz, 1H), 7.43 (s, 1H), 7.36 (dd, *J* = 4.5, 2.7 Hz, 2H), 7.23 – 7.19 (m, 2H), 7.05 – 6.99 (m, 3H), 6.72 (t, *J* = 4.8 Hz, 1H), 3.92 (s, 3H), 2.31 (s, 3H). **<sup>13</sup>C NMR** (101 MHz, CDCl<sub>3</sub>) δ 157.53, 157.1, 154.1, 141.5, 137.0, 136.9, 135.1, 128.5, 127.9, 127.4, 127.2, 126.8, 126.0, 123.3, 122.0, 118.6, 116.6, 114.0, 100.6, 55.9, 17.4. **HR-MS** (ESI) *m/z* calcd for C<sub>24</sub>H<sub>20</sub>N<sub>3</sub>O<sup>+</sup>[M+H<sup>+</sup>] 366.1606, found 366.1603.

### Hyellazole derivative (13)

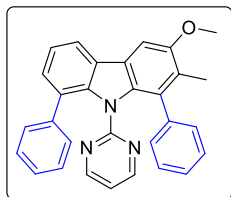

Yield (0.1 mmol scale, 36 mg, 82 %); white solid (hexane/ethyl acetate = 9.1:1.0, V/V). **<sup>1</sup>H NMR** (400 MHz, CDCl<sub>3</sub>) δ 8.05 (dd, J = 7.8, 1.2 Hz, 1H), 7.69 (d, J = 4.8 Hz, 2H), 7.57 (s, 1H), 7.25 (t, J = 7.5 Hz, 1H), 7.14 (dd, J = 7.3, 1.3 Hz, 1H), 6.92 – 6.84 (m, 8H), 6.79 (dt, J = 4.6, 3.5 Hz, 2H), 6.37 (t, J = 4.8 Hz, 1H), 3.97 (s, 3H), 1.94 (s, 3H). **<sup>13</sup>C NMR** (101 MHz, CDCl<sub>3</sub>) δ 157.9, 156.5, 153.0, 140.1, 138.3, 138.2, 133.4, 129.9, 128.7, 128.6, 127.6, 127.4, 127.0, 126.9, 125.9, 125.6, 125.6, 125.5, 122.4, 120.1, 118.7, 117.8, 100.1, 56.1, 13.9. **HR-MS** (ESI) m/z calcd for C<sub>30</sub>H<sub>24</sub>N<sub>3</sub>O<sup>+</sup>[M+H<sup>+</sup>] 442.1919, found 442.1927.

### 1-phenyl-9H-carbazole (14)

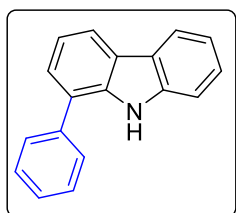

Yield (0.1 mmol scale, 18.72 mg, 78 %); white solid (hexane/ethyl acetate = 9.1:1.0, V/V). **<sup>1</sup>H NMR** (400 MHz, CDCl<sub>3</sub>) δ 8.32 (s, 1H), 8.11 (ddd, J = 13.3, 7.7, 0.7 Hz, 2H), 7.71 (dt, J = 8.0, 1.6 Hz, 2H), 7.59 – 7.54 (m, 2H), 7.47 – 7.41 (m, 4H), 7.33 (t, J = 7.6 Hz, 1H), 7.28 – 7.23 (m, 1H). **<sup>13</sup>C NMR** (101 MHz, CDCl<sub>3</sub>) δ 139.5, 139.1, 137.3, 129.3, 128.4, 127.6, 126.0, 125.7, 125.0, 123.7, 123.5, 120.5, 119.9, 119.6, 119.5, 110.7. **HR-MS** (ESI) m/z calcd for C<sub>18</sub>H<sub>14</sub>N<sup>+</sup>[M+H<sup>+</sup>] 244.1121, found 244.1117.

## 6.0 $^1\text{H}$ and $^{13}\text{C}$ NMR spectra

GP-SS-6.10.1.1r

9.15  
9.14  
9.14  
9.14  
8.89  
8.87  
8.86  
8.85  
8.14  
8.14  
8.12  
8.12  
8.12  
8.12  
8.11  
8.11  
8.10  
8.10  
8.09  
7.79  
7.79  
7.77  
7.77  
7.65  
7.64  
7.63  
7.62  
7.56  
7.55  
7.54  
7.53  
7.51  
7.50  
7.50  
7.49  
7.42  
7.42  
7.42  
7.42  
7.40  
7.40  
7.40  
7.39  
7.39  
7.38  
7.38  
7.14  
7.13  
7.12

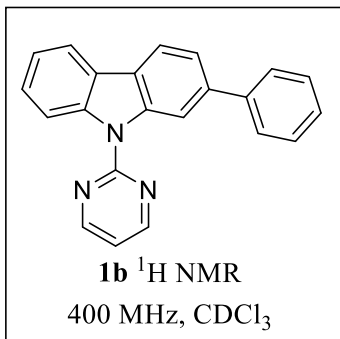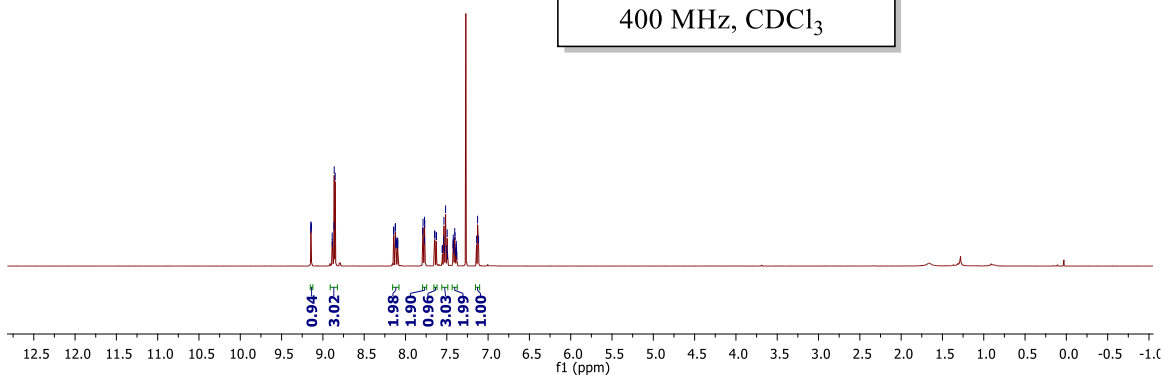

GP-SS-6.11.1.1r

159.12  
157.88  
142.23  
139.97  
139.66  
139.58  
138.69  
127.68  
127.01  
126.59  
125.51  
124.96  
122.38  
121.84  
119.66  
119.54  
116.24  
116.01  
115.03

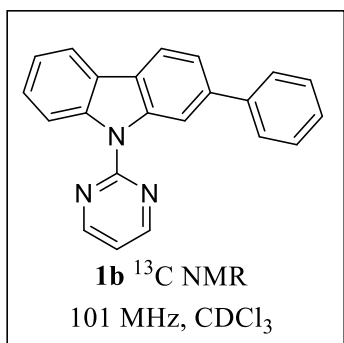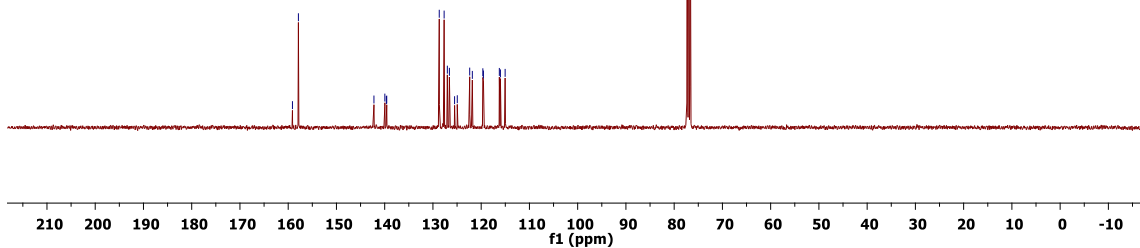



GP-SS-25

8.02  
8.02  
8.02  
8.76  
8.74  
8.74  
8.71  
8.70  
8.00  
8.00  
7.98  
7.60  
7.58  
7.51  
7.49  
7.49  
7.40  
7.27  
7.25  
7.25  
7.13  
6.97  
6.96  
5.95  
5.95  
2.89  
2.88  
2.86  
1.24  
1.22

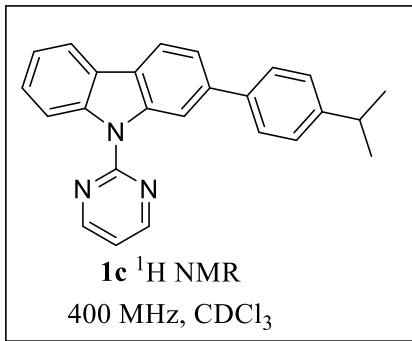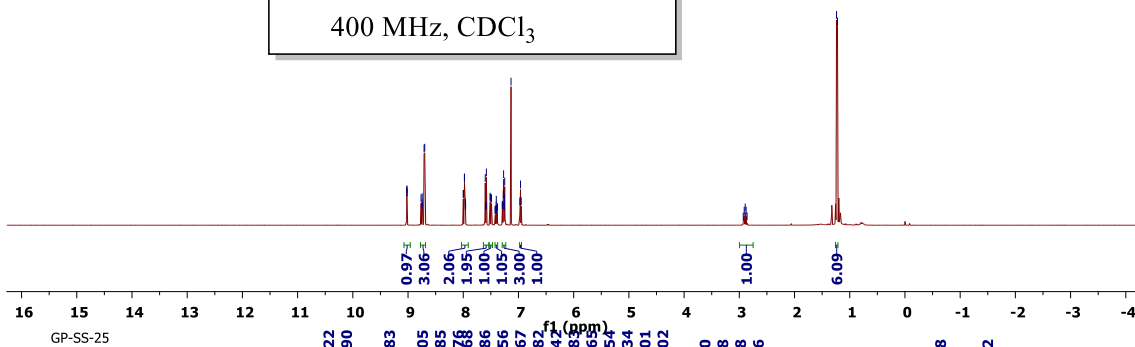

GP-SS-25

159.22  
157.90  
147.83  
140.05  
139.85  
135.68  
126.86  
126.56  
125.67  
124.82  
122.42  
121.86  
119.68  
119.54  
116.34  
116.01  
115.02  
77.40  
77.28  
77.08  
76.76  
33.88  
24.12

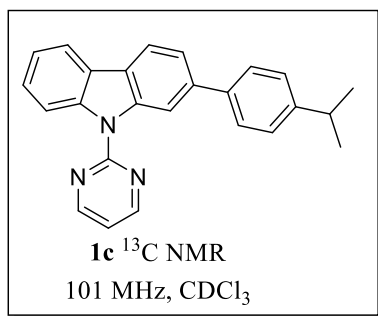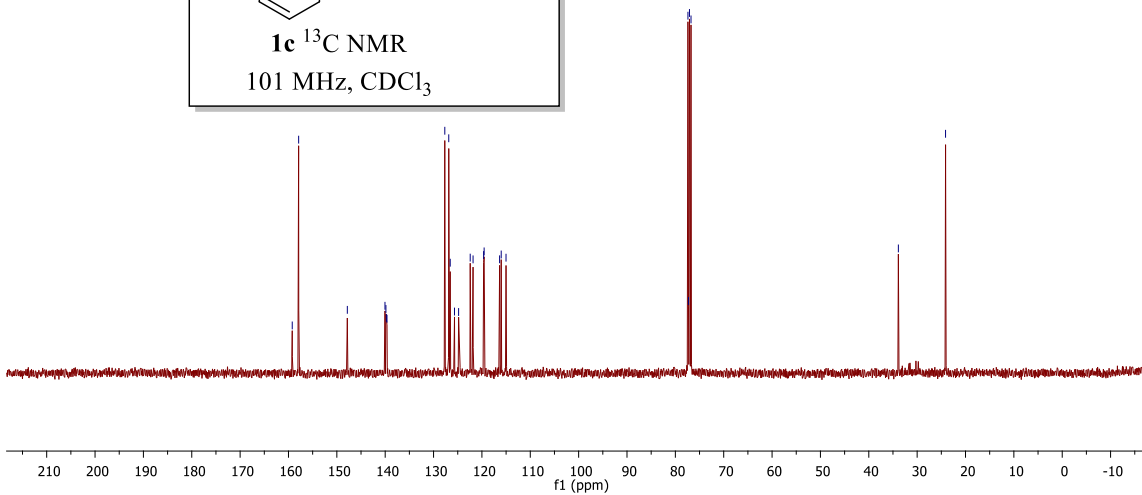

GP-SS-26

9.15  
9.15  
9.14  
9.14  
8.90  
8.88  
8.88  
8.84  
8.83  
7.70  
7.69  
7.68  
7.64  
7.64  
7.62  
7.62  
7.54  
7.54  
7.43  
7.41  
7.41  
7.34  
7.33  
7.10  
7.09  
2.89

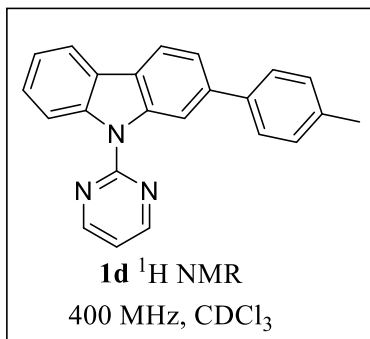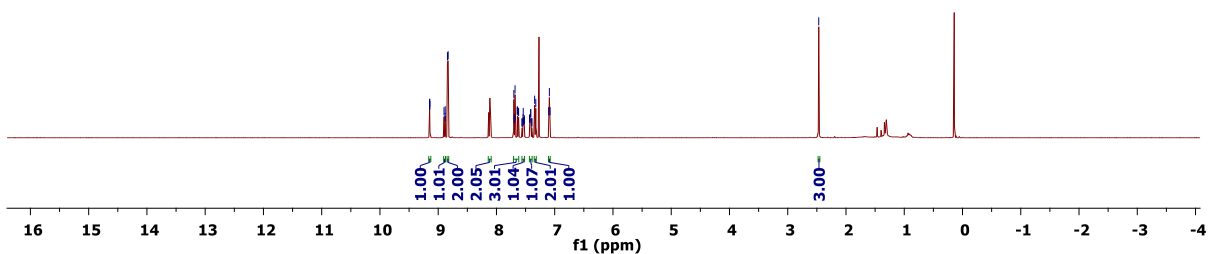

GP-SS-11.43.1.1r

159.18  
157.97  
140.00  
139.72  
139.58  
139.41  
136.81  
129.46  
127.56  
126.54  
125.62  
124.78  
122.40  
121.75  
119.65  
119.53  
116.26  
116.06  
114.87  
21.16

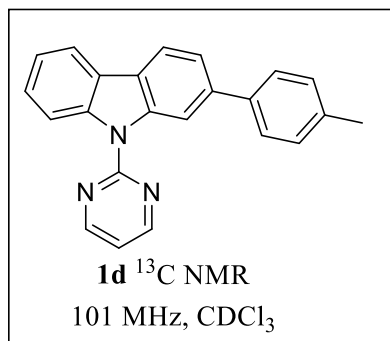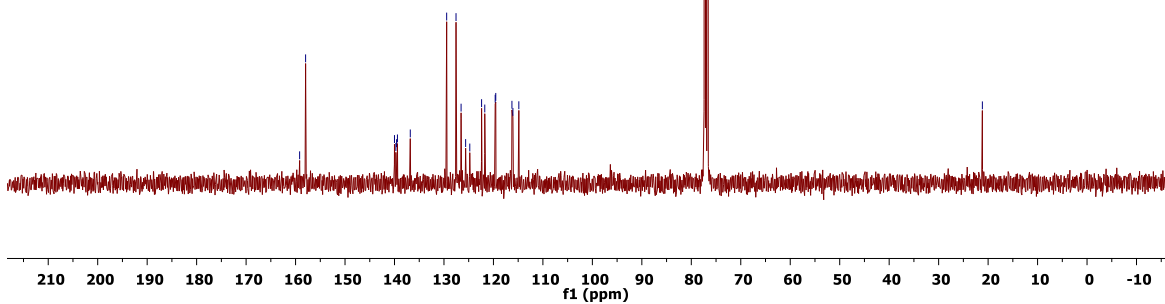

GP-SS-12.52.1.1r

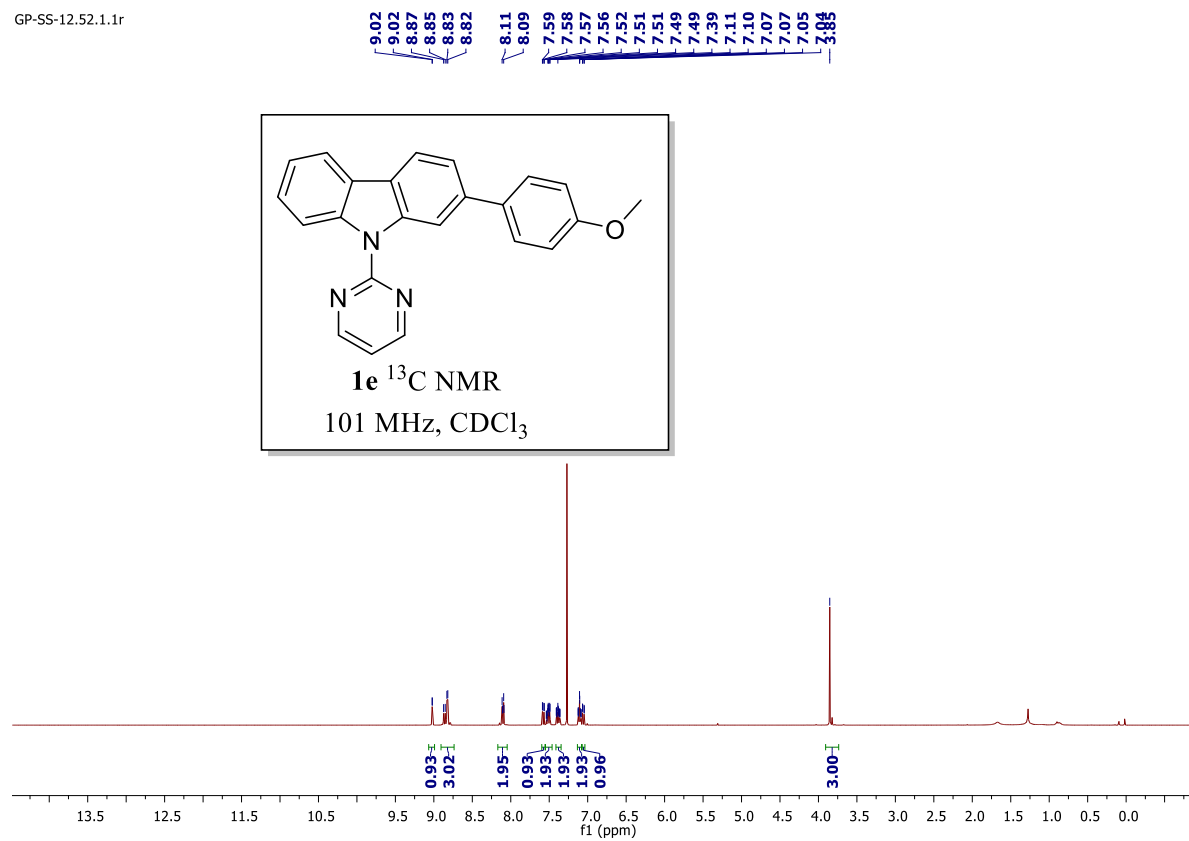

GP-SM-09-122

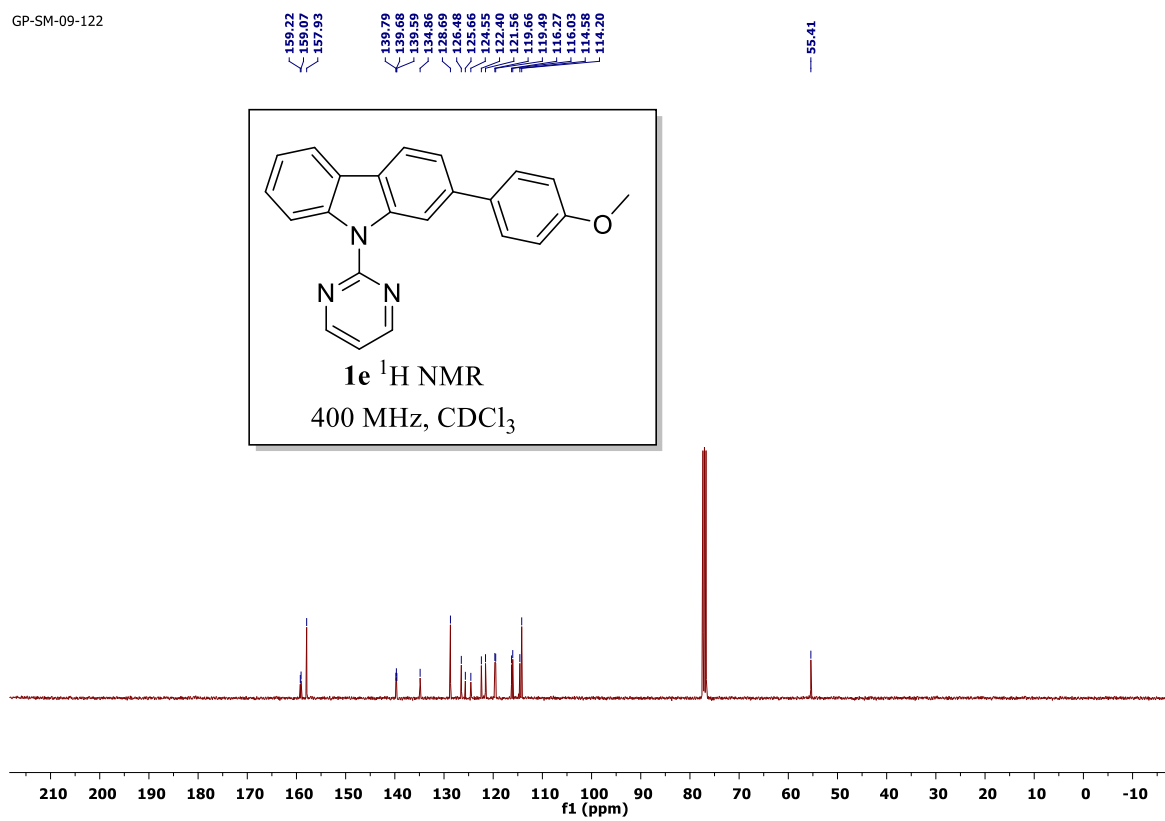

GP-SS-1

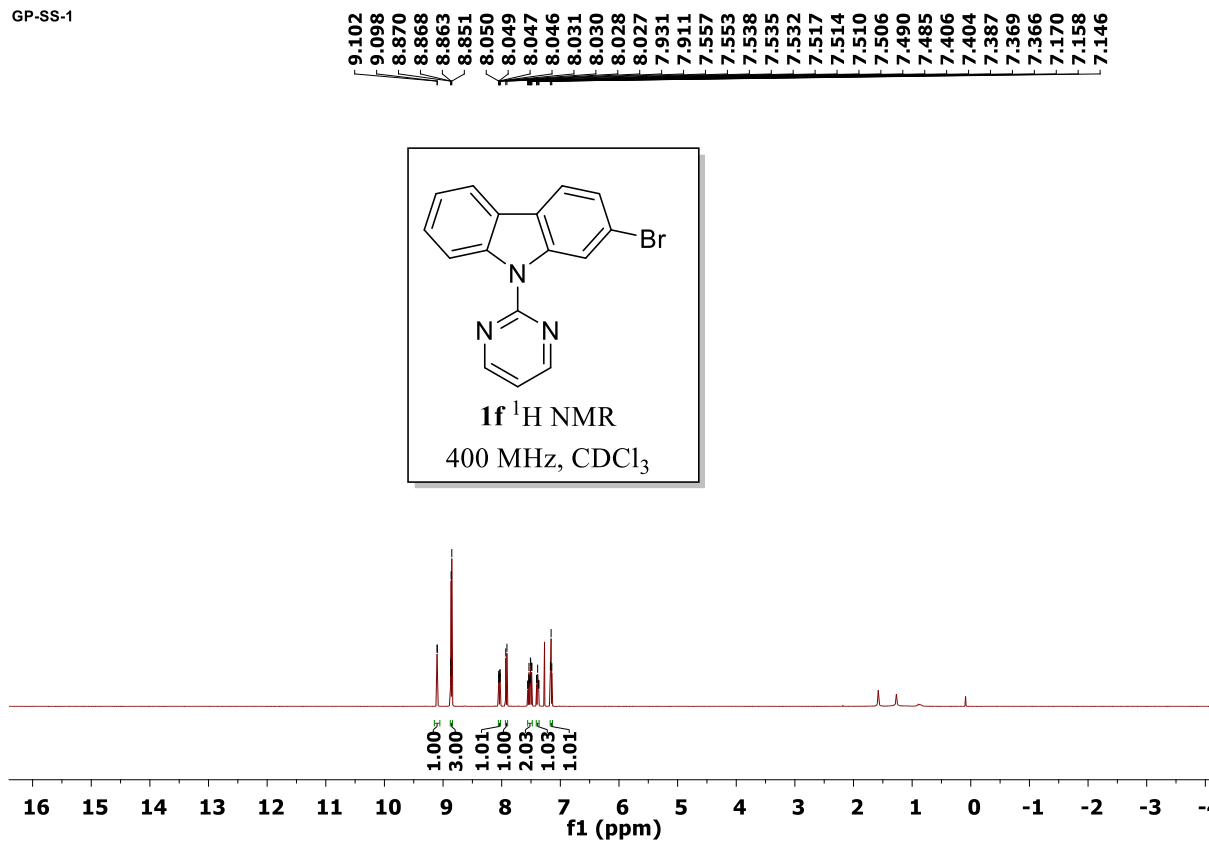

GP-SS-1-1

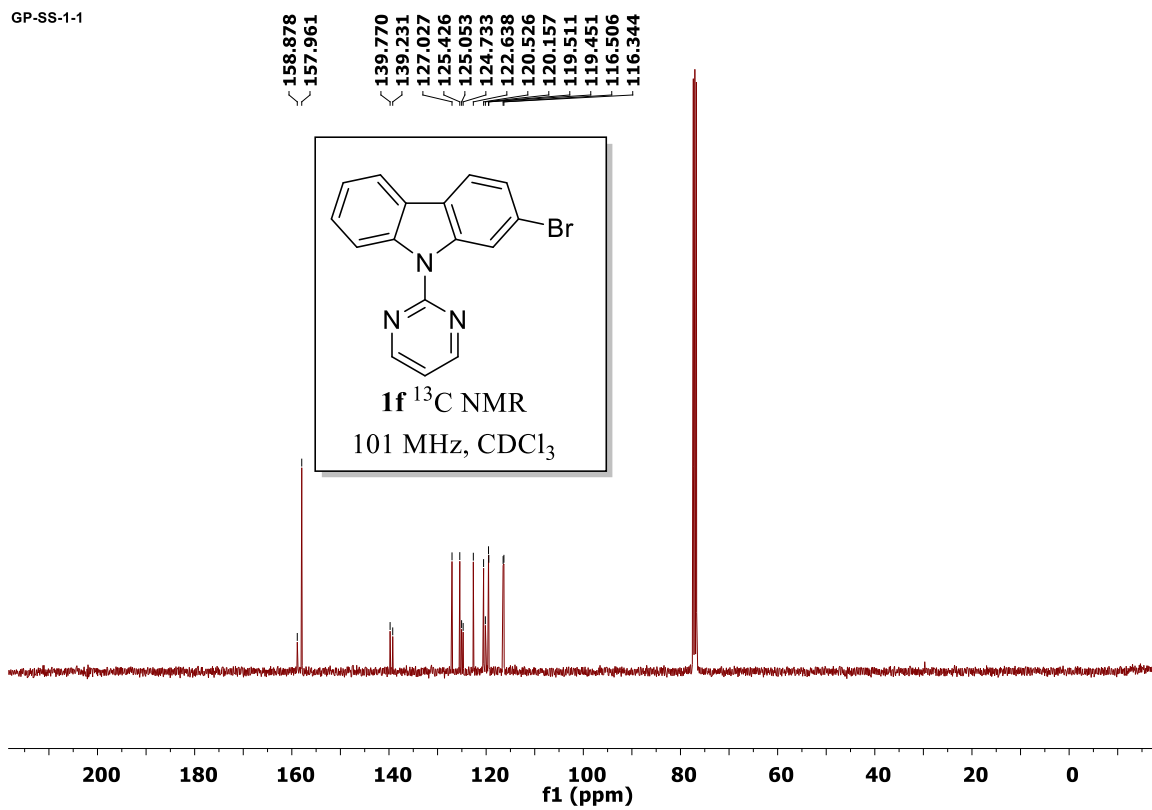

GP-SS-2

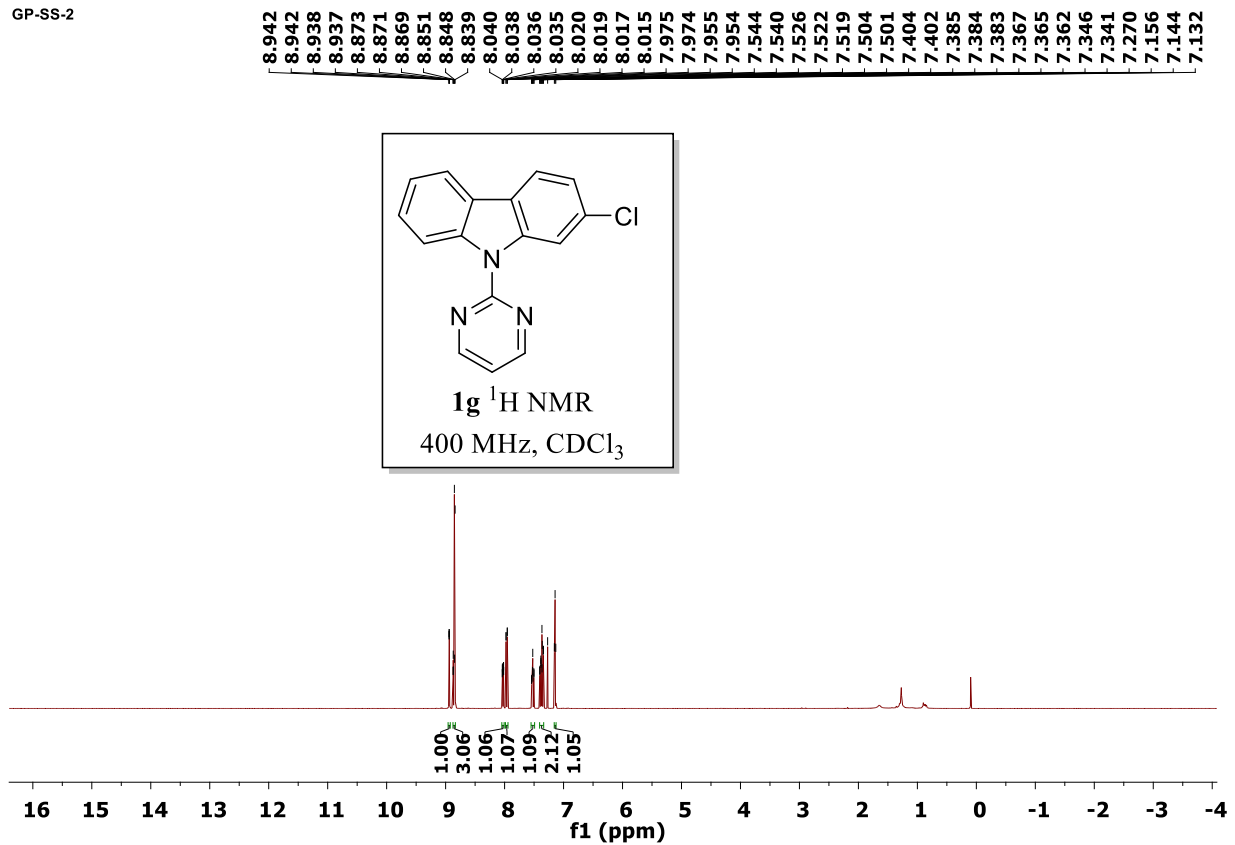

GP-SS-2-1

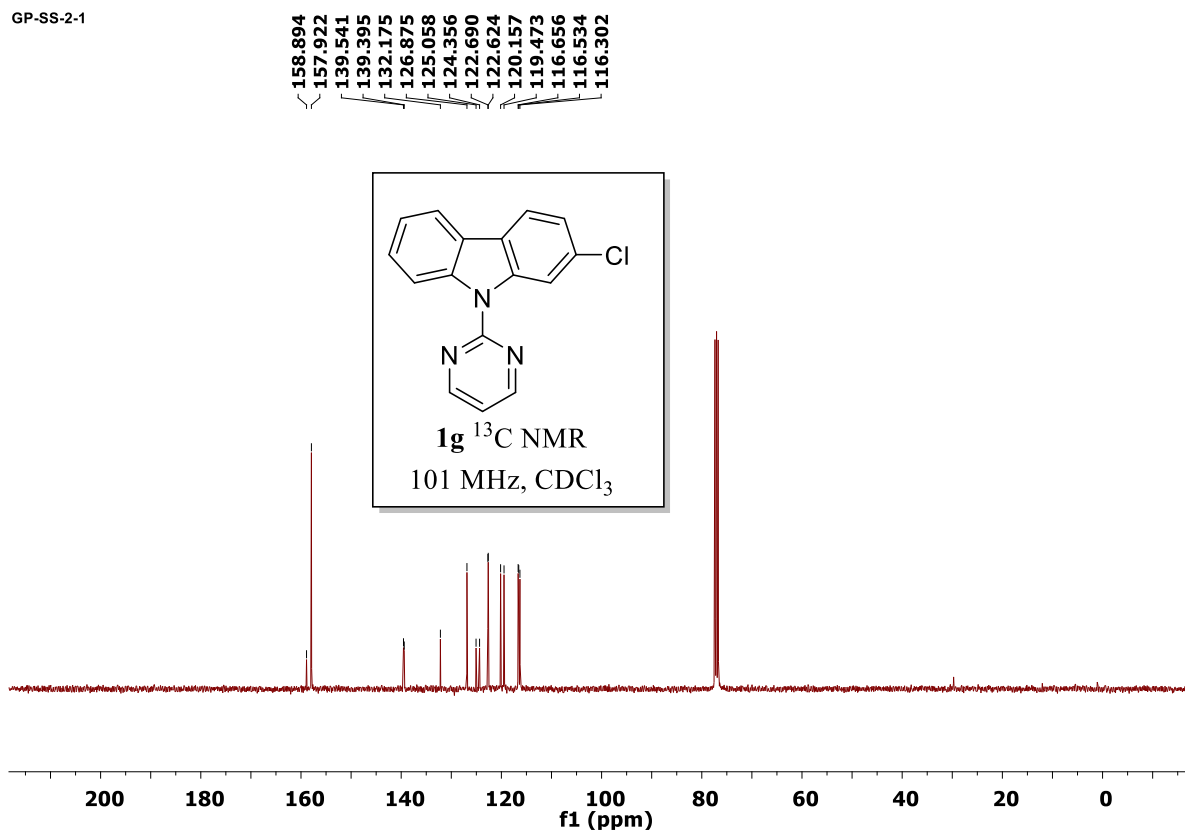

GP-SS-4.10.1.1r

9.11  
8.81  
8.79  
8.77  
8.76  
8.04  
8.02  
8.01  
8.01  
7.99  
7.54  
7.52  
7.50  
7.48  
7.46  
7.33  
7.31  
7.29  
7.17  
7.08  
7.06  
7.05

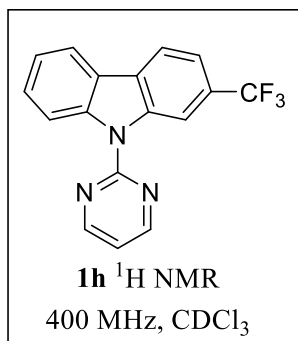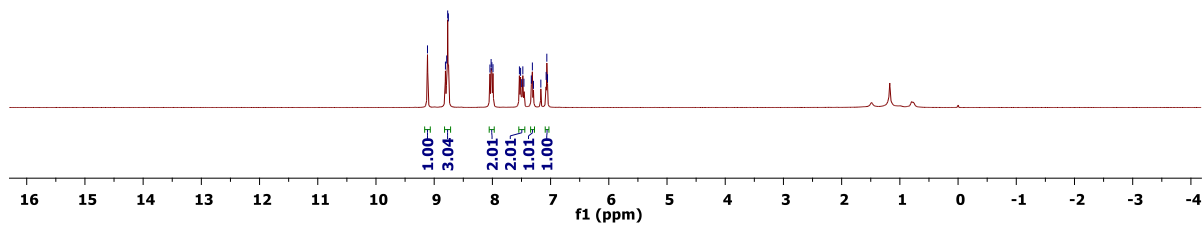

pdata/1

158.89  
157.99  
140.04  
138.41  
128.42  
128.10  
127.84  
126.28  
124.62  
123.57  
122.71  
120.10  
119.69  
119.03  
118.99  
116.65  
116.46  
114.00  
113.96

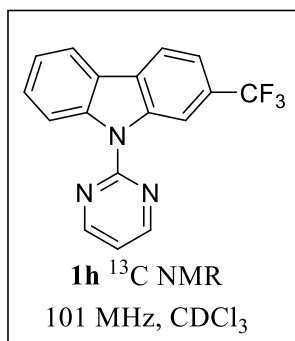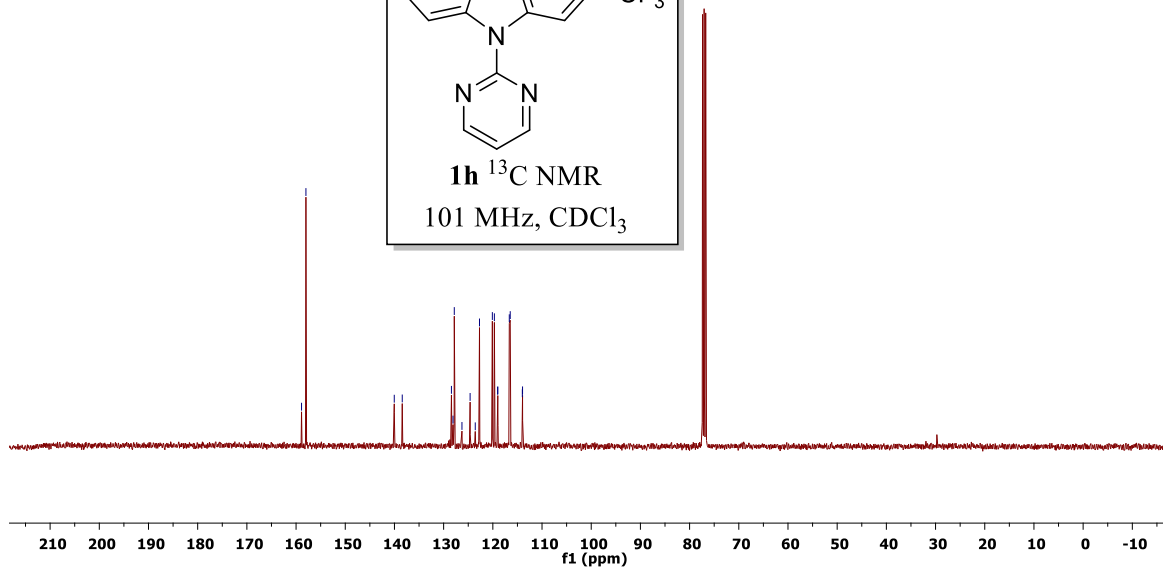

GP-5S-5.10.1.1r

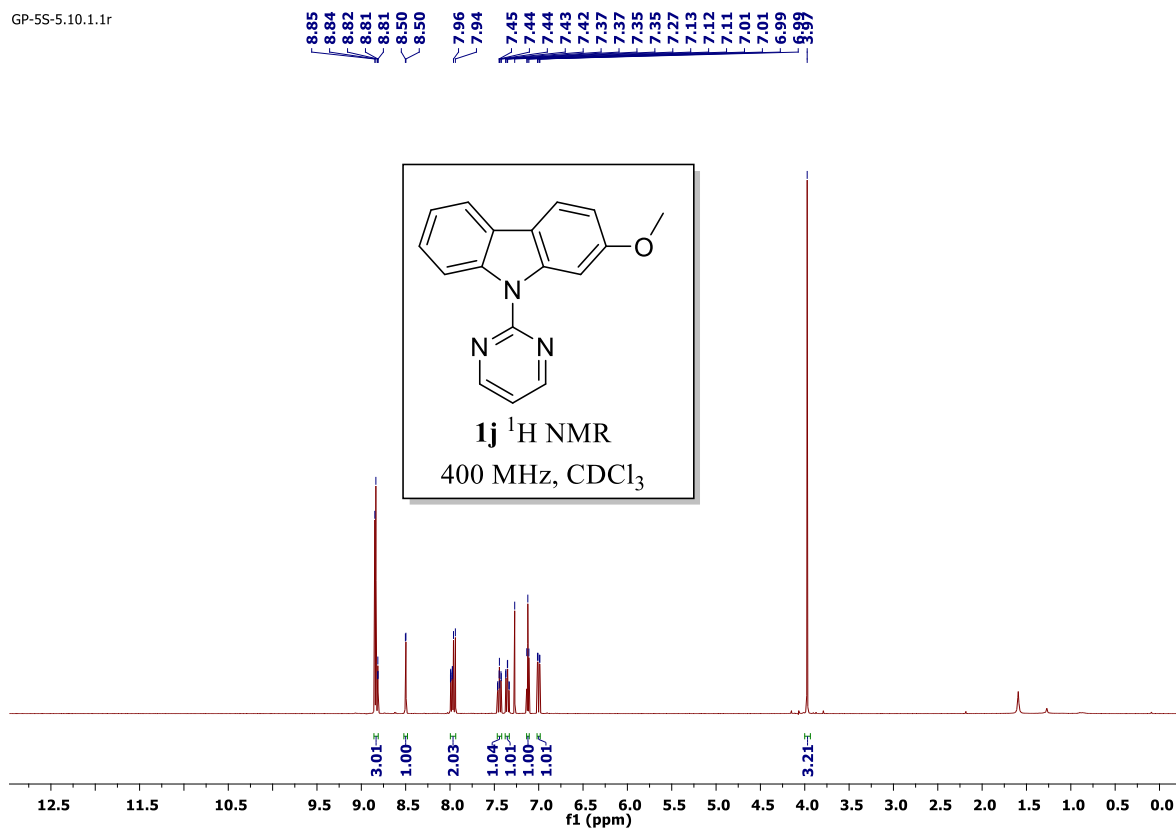

GP-5S-5.11.1.1r

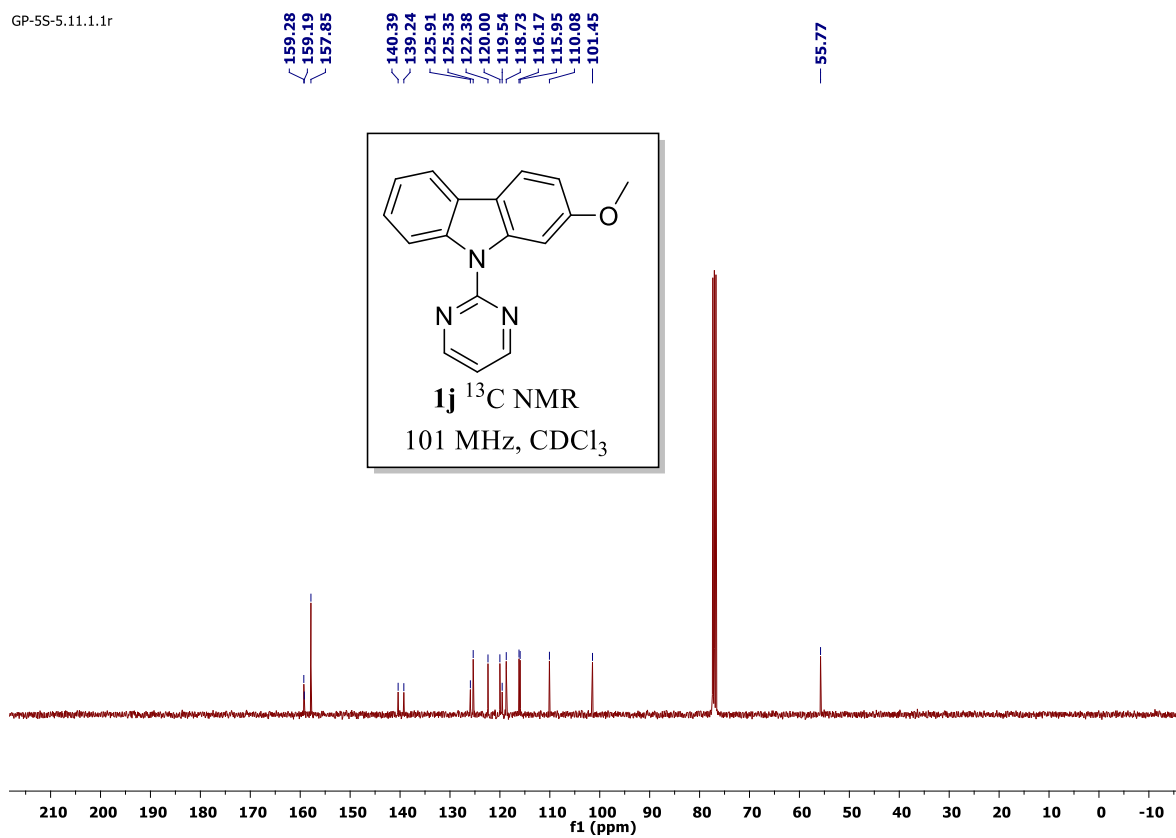

GP-SS-10.32.1.1r

8.85  
8.83  
8.82  
8.42  
8.40  
8.08  
8.06  
7.53  
7.51  
7.49  
7.38  
7.36  
7.35  
7.12  
7.11  
7.10  
7.04  
7.02  
6.20

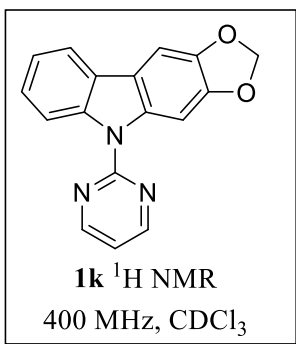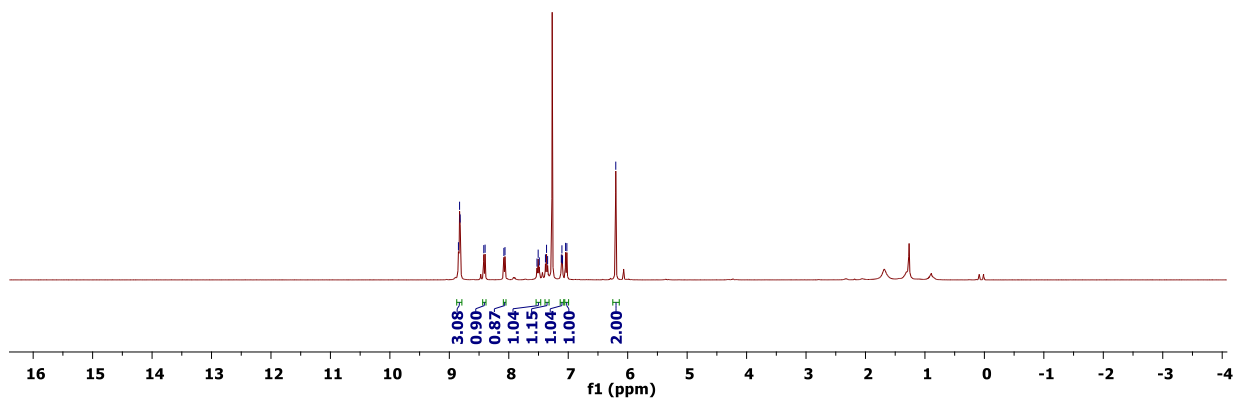

GP-SS-10.33.1.1r

159.16  
157.82  
142.84  
140.56  
139.66  
135.60  
126.68  
122.98  
122.43  
121.99  
116.17  
115.83  
110.66  
108.19  
106.78  
101.87

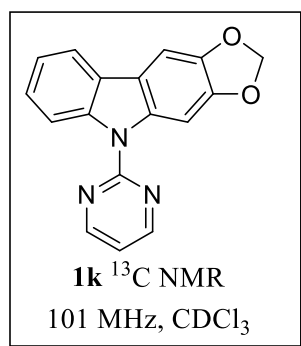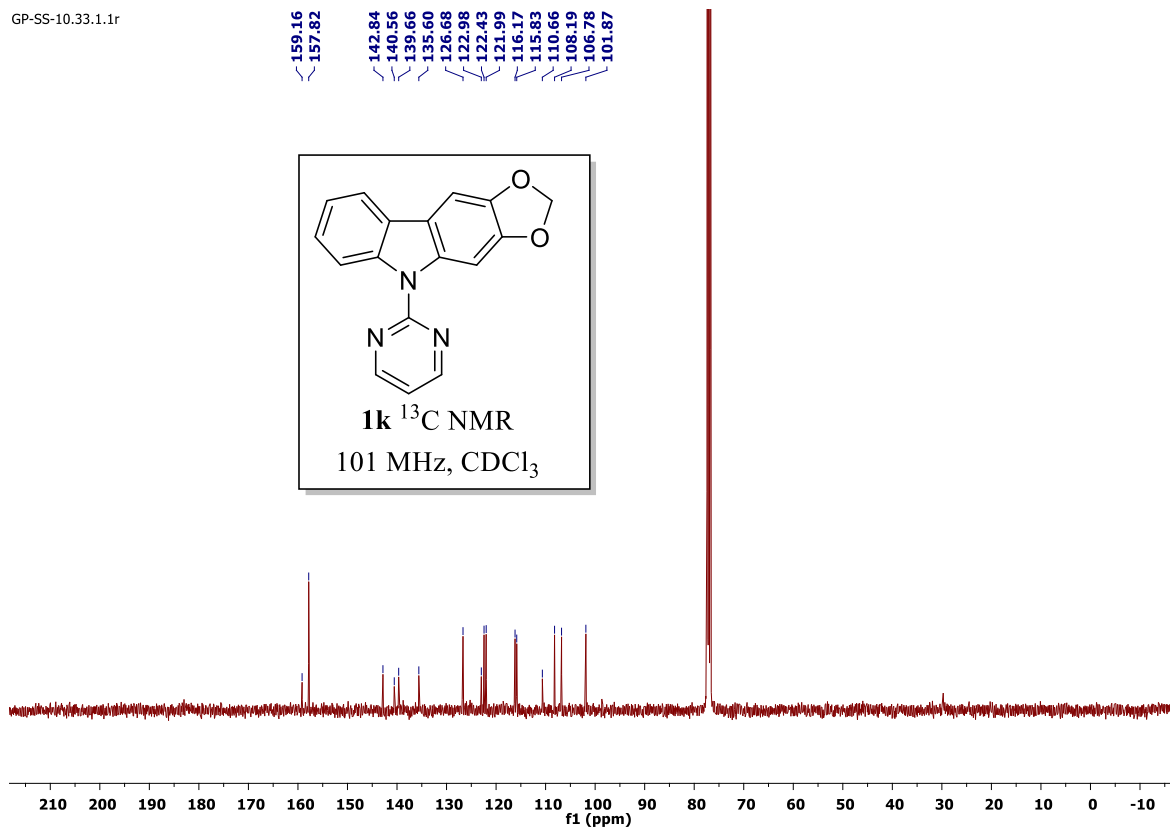



GP-SS-9.10.1.1r

8.80  
8.79  
8.48  
8.48  
7.82  
7.88  
7.07  
7.06  
6.98  
6.97  
6.96  
6.95

3.95

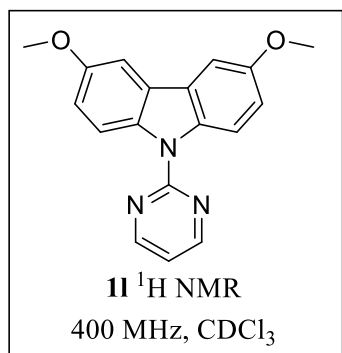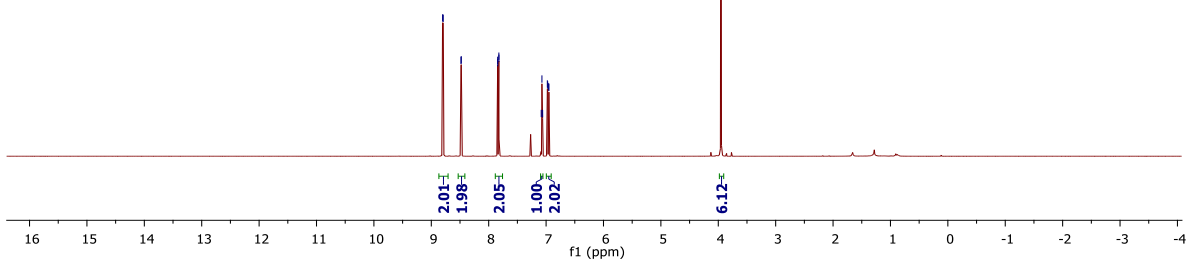

GP-SS-9.11.1.1r

159.86  
159.08  
158.46

141.11

120.39  
119.78  
116.56  
110.51

102.63

56.49

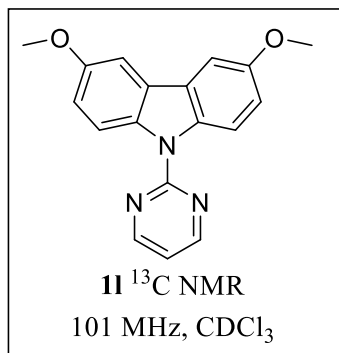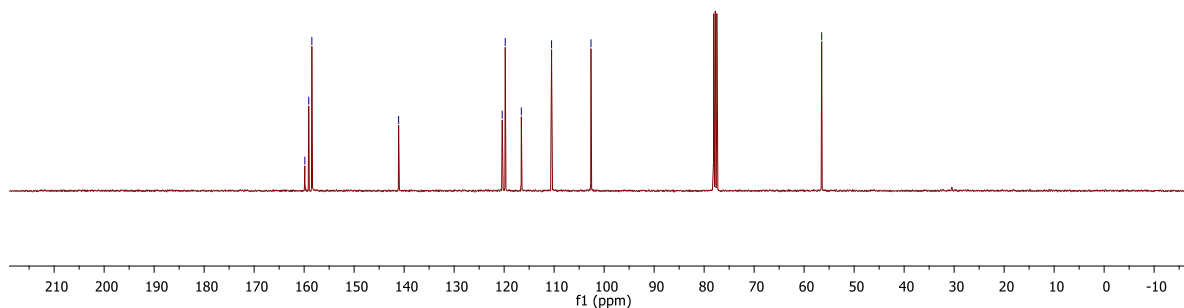

GP-SM-10-105

8.38  
8.37  
8.36  
8.18  
8.17  
8.16  
7.86  
7.85  
7.45  
7.44  
7.42  
7.41  
7.40  
7.40  
7.35  
7.33  
7.31  
7.25  
7.24  
7.23  
7.22  
7.21  
7.17  
7.16  
7.15  
7.04  
7.04  
7.03  
6.97  
6.95  
6.94  
6.75  
6.73

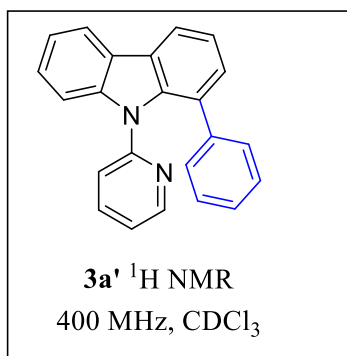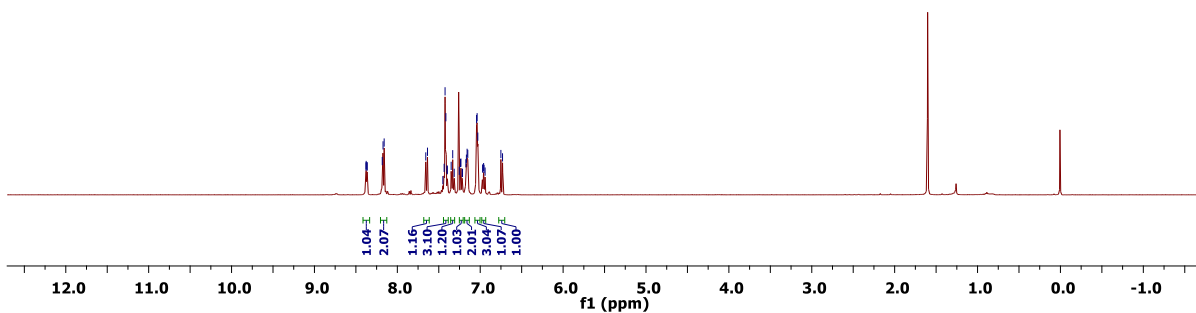

GP-SM-10-105

151.46  
148.34  
141.99  
139.69  
137.71  
136.75  
128.64  
128.57  
127.72  
126.46  
126.20  
120.97  
118.93

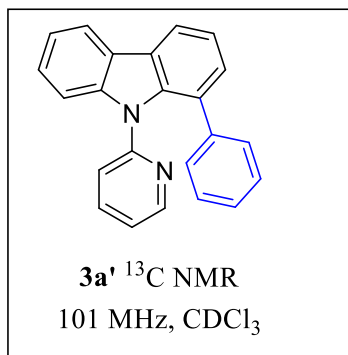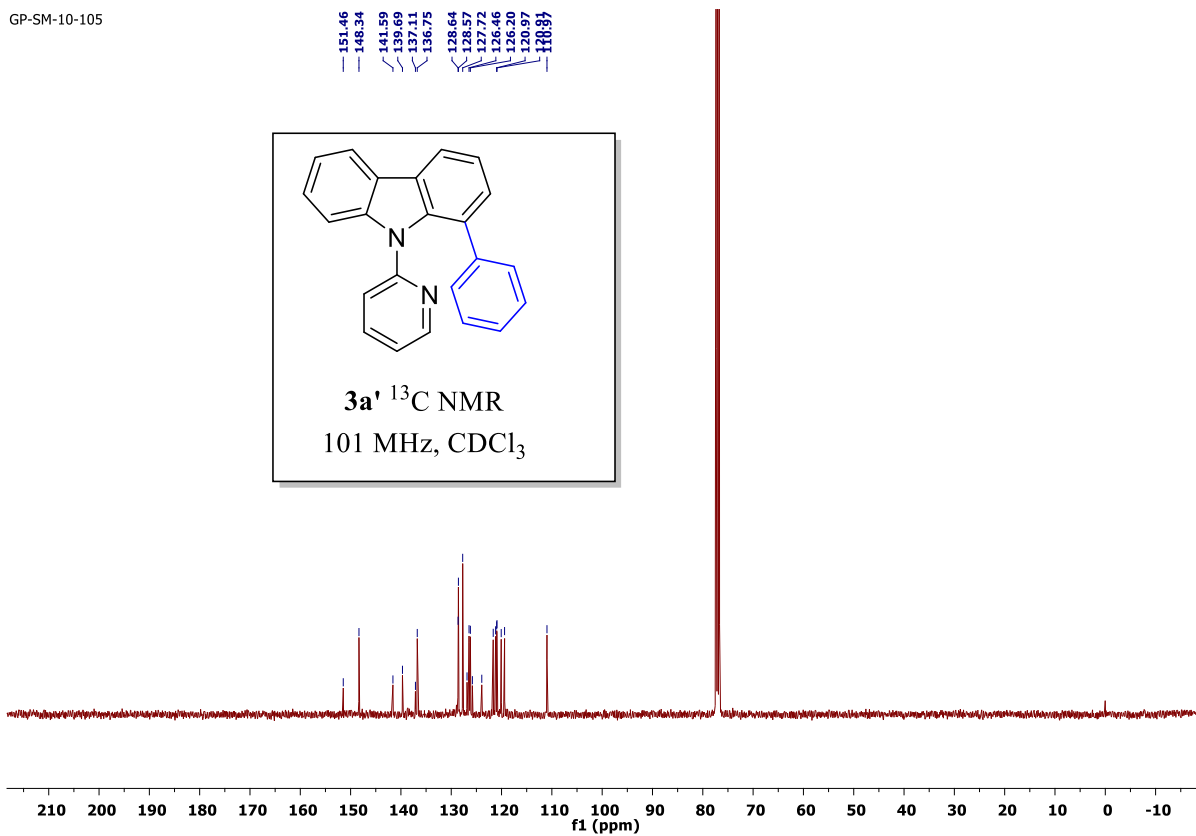

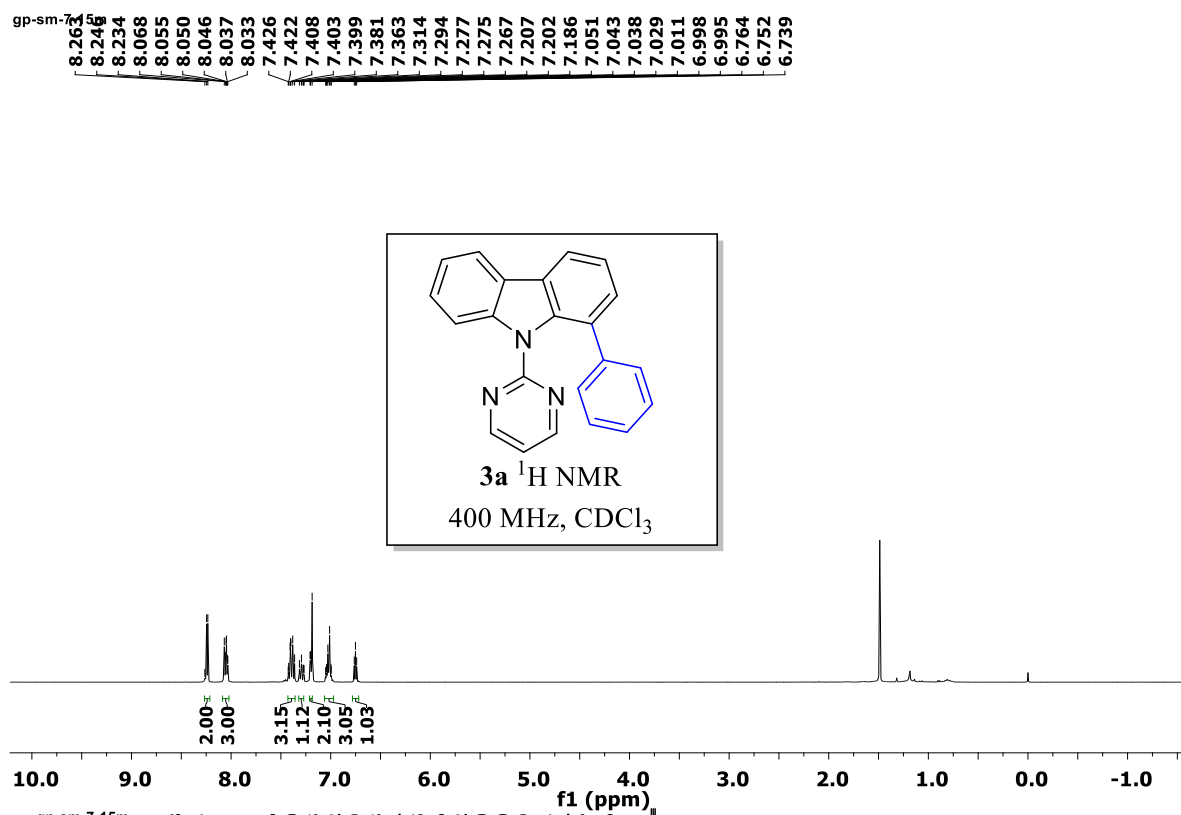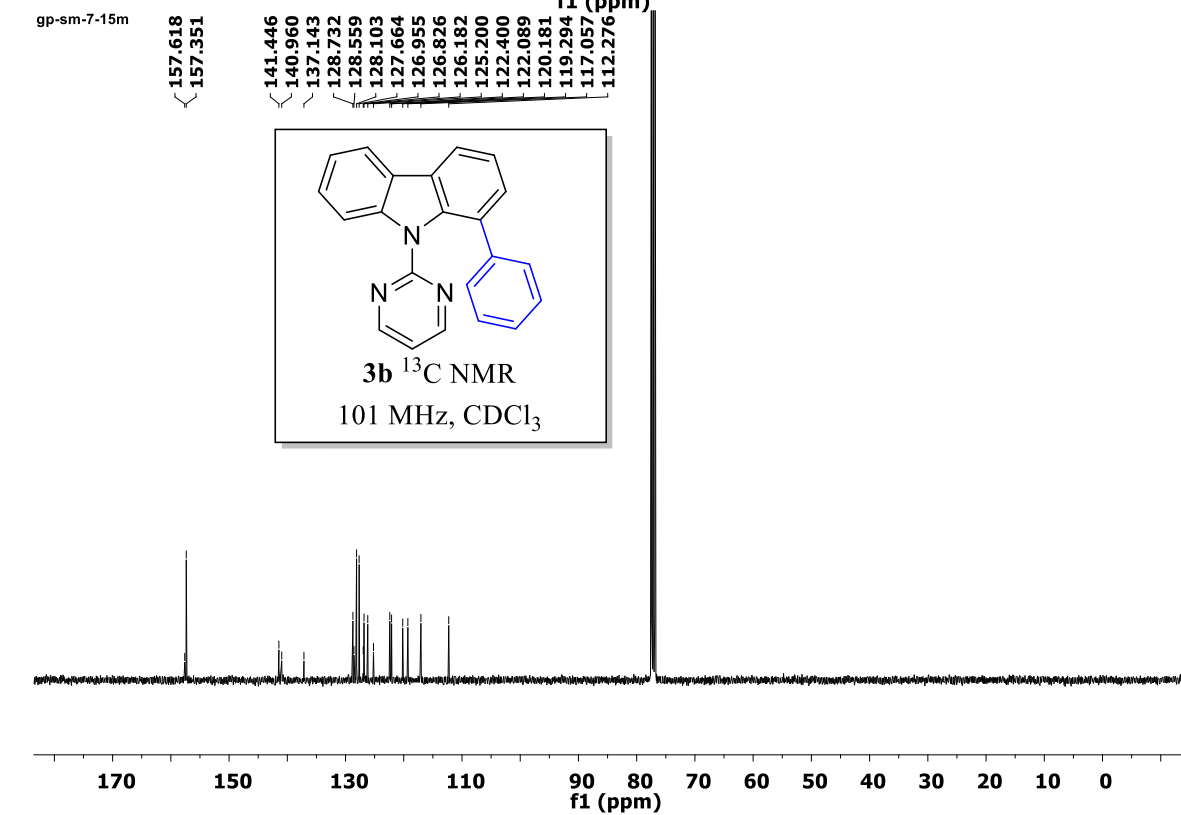

GP-PM-453A

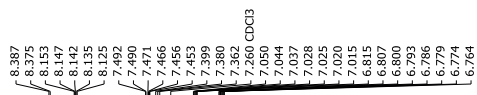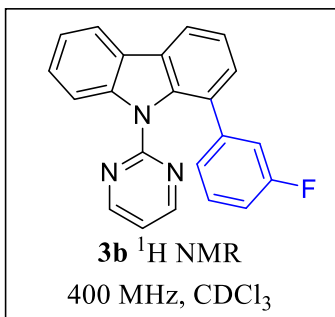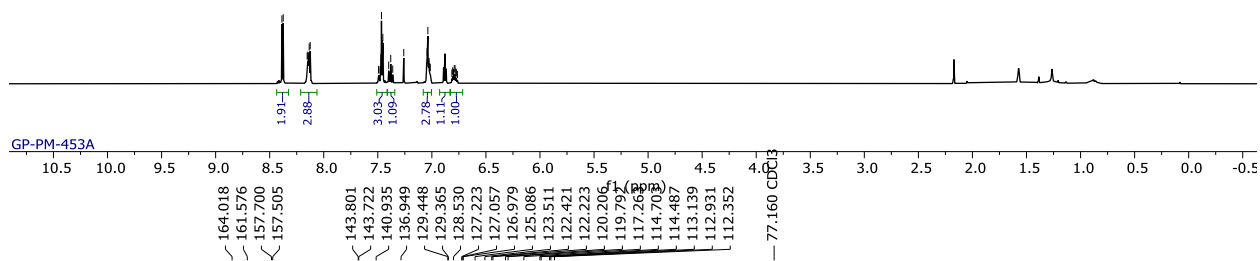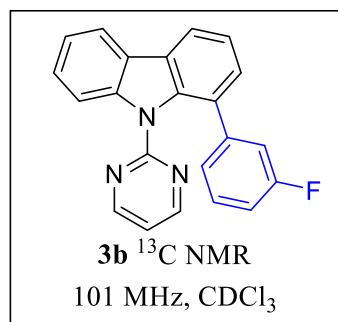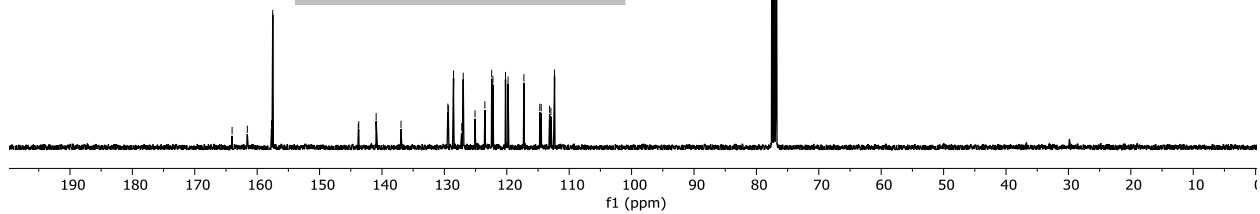

GP-PM-451A

8.175  
8.160  
8.153  
8.139  
8.128  
8.121  
8.107  
7.465  
7.462  
7.449  
7.442  
7.434  
7.431  
7.426  
7.423  
7.414  
7.412  
7.372  
7.358  
7.341  
7.260  
7.208  
7.204  
7.189  
7.185  
6.985  
6.981  
6.966  
6.962  
6.947  
6.943  
6.831  
6.819  
6.807

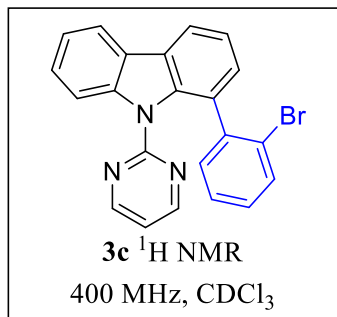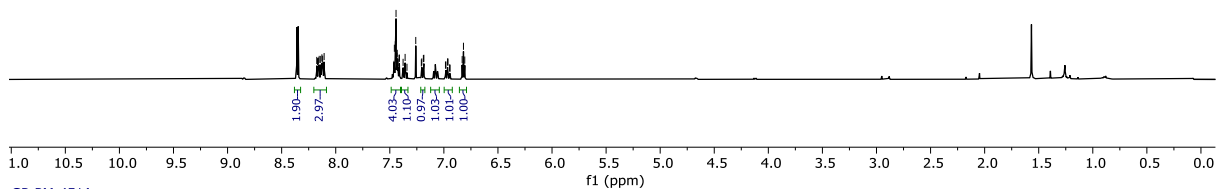

GP-PM-451A

157.236  
157.182  
142.223  
140.561  
136.921  
132.607  
131.050  
129.582  
128.042  
127.050  
126.940  
126.706  
126.706  
125.018  
123.166  
122.069  
121.685  
120.061  
119.910  
116.868  
112.346

77.160  $\text{CDCl}_3$

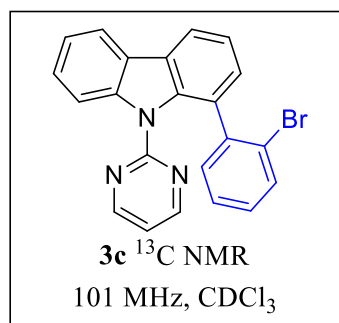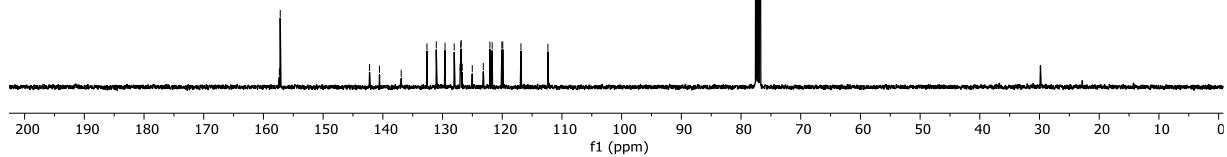

S45

GP-SM-7-118

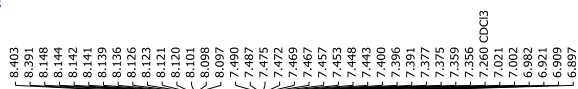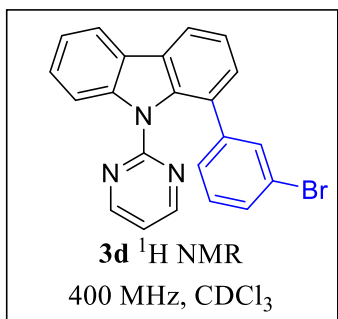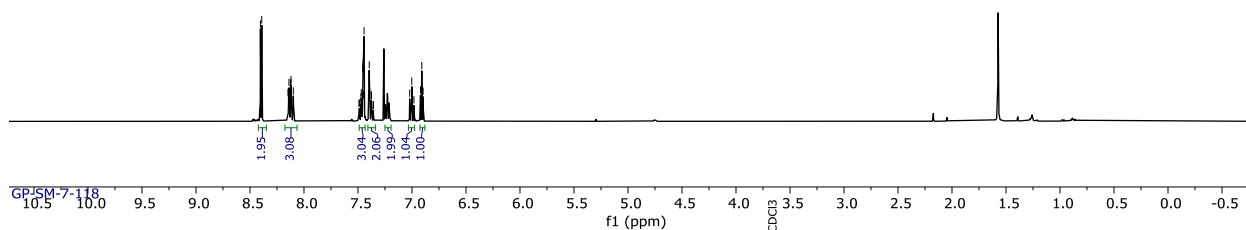

GP-SM-7-118

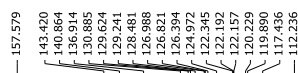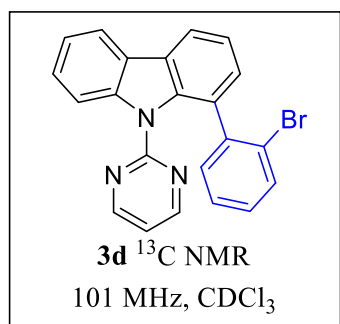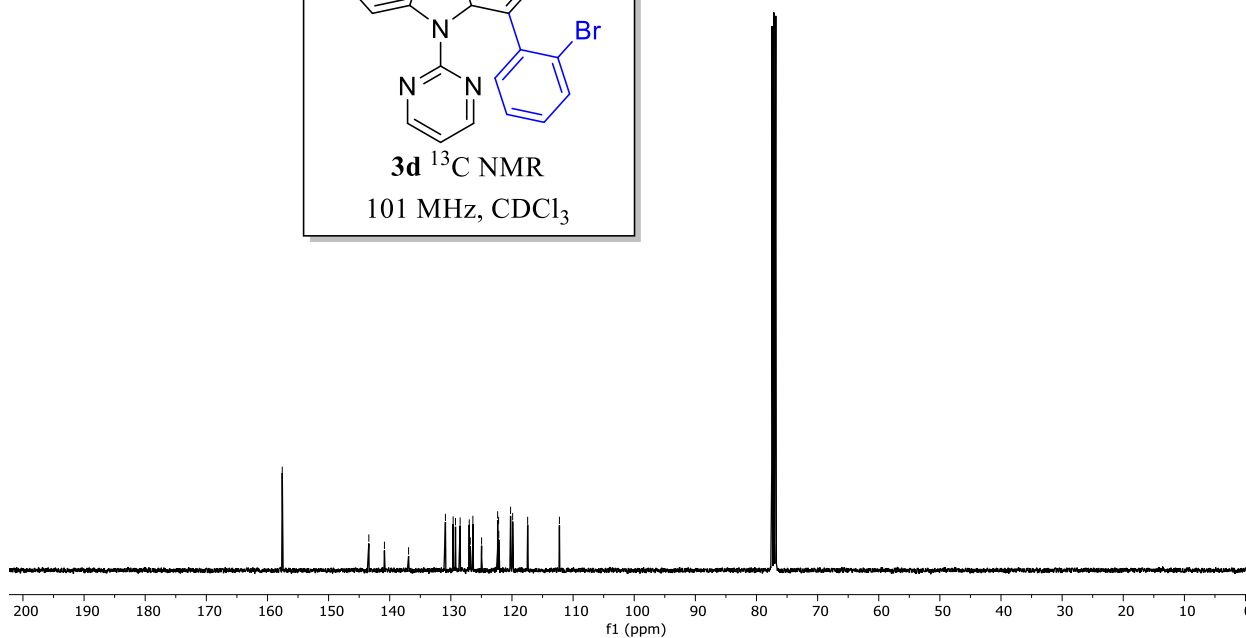

GP-SM-7-156-B

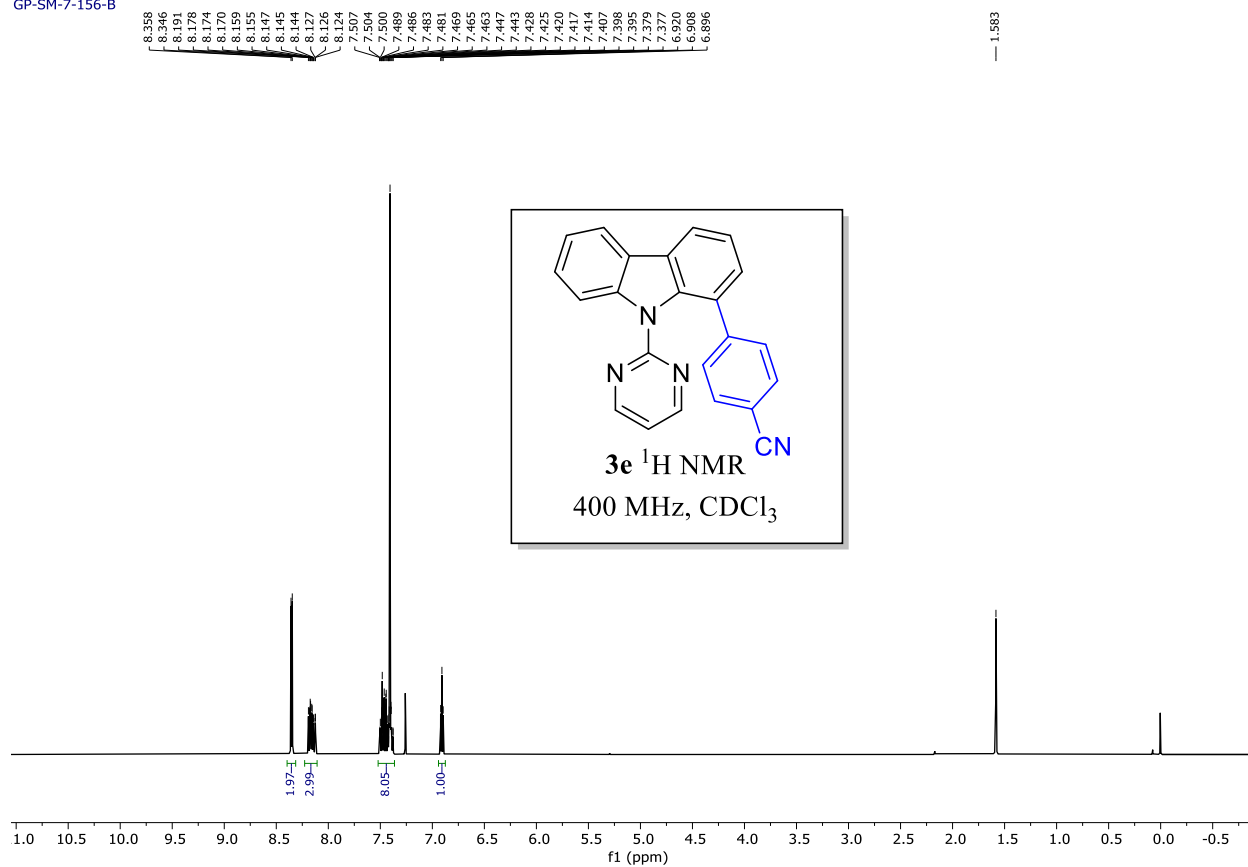

GP-SM-7-156-B

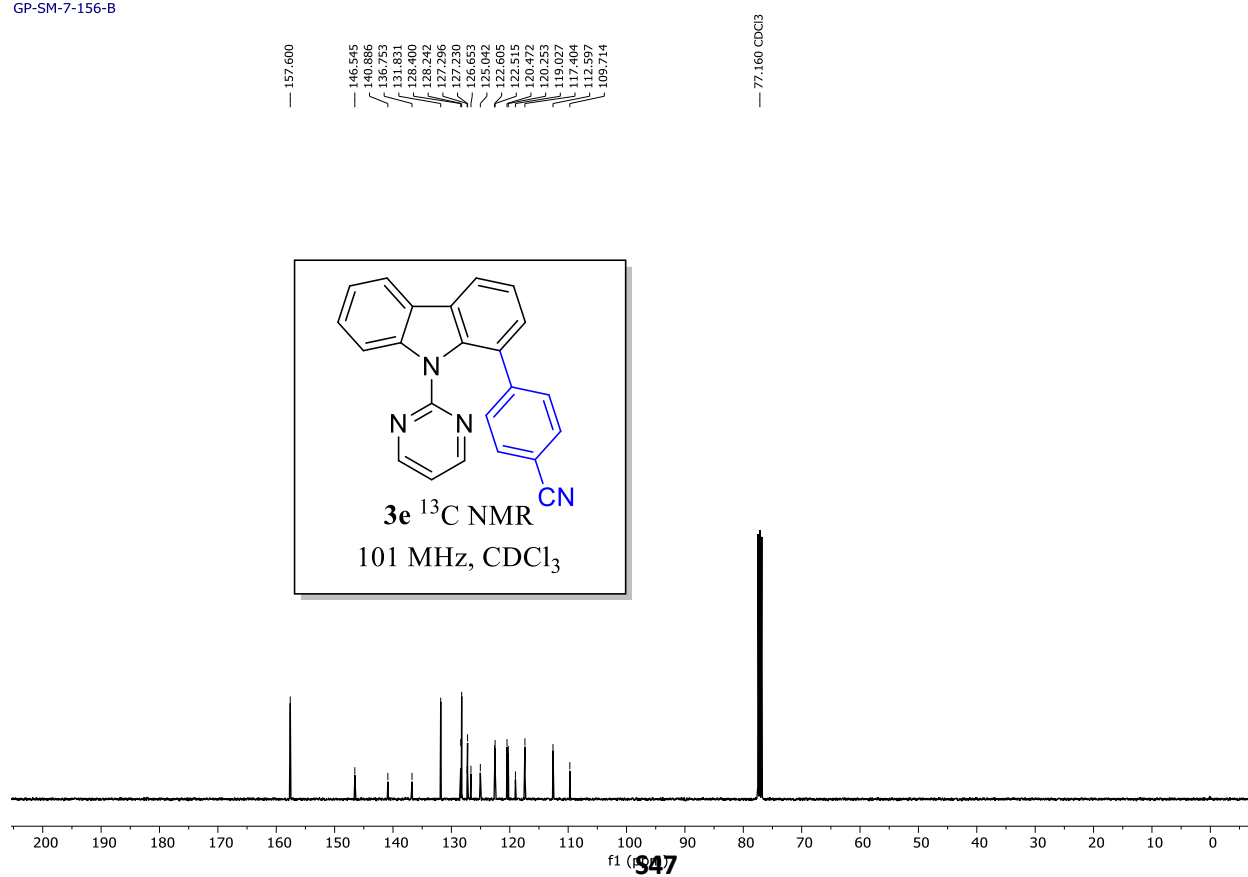

GP-SM-10-100

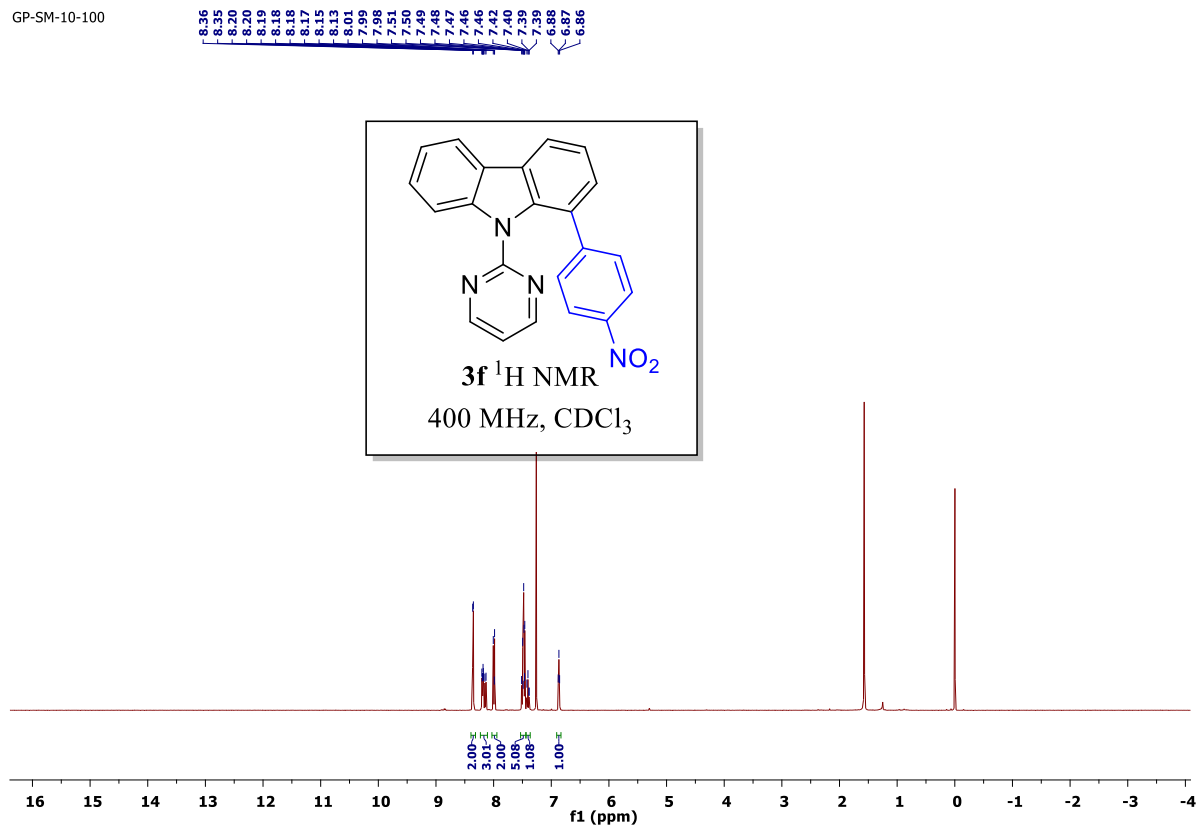

GP-SM-10-100

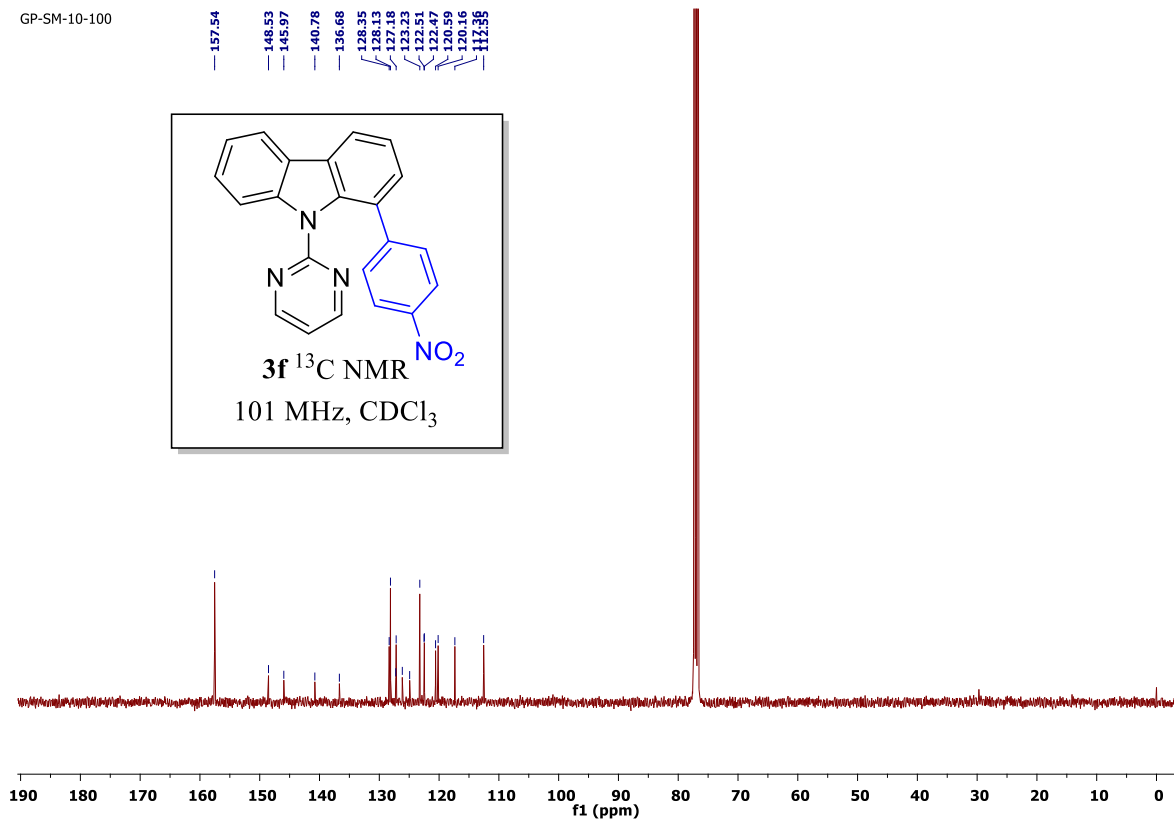



GP-SM-7-109

8.326  
8.311  
8.173  
8.154  
8.132  
7.514  
7.483  
7.477  
6.859  
6.845  
6.833

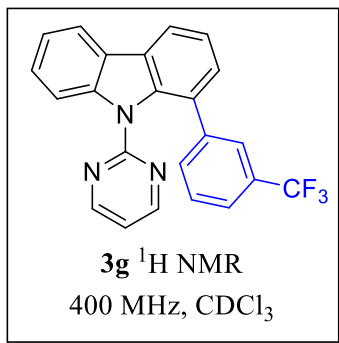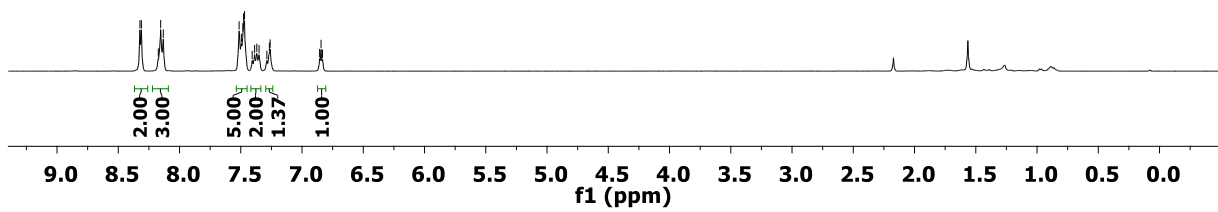

GP-SM-7-109

157.522  
157.458  
142.439  
140.888  
136.898  
130.987  
128.654  
128.611  
127.118  
127.074  
126.930  
125.017  
124.569  
124.532  
122.943  
122.904  
122.468  
122.304  
120.234  
120.020  
117.241  
112.426

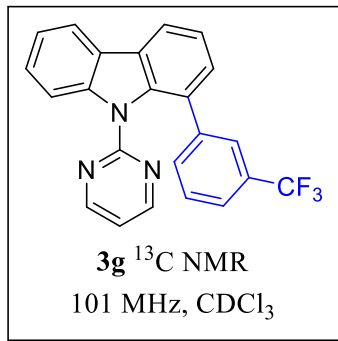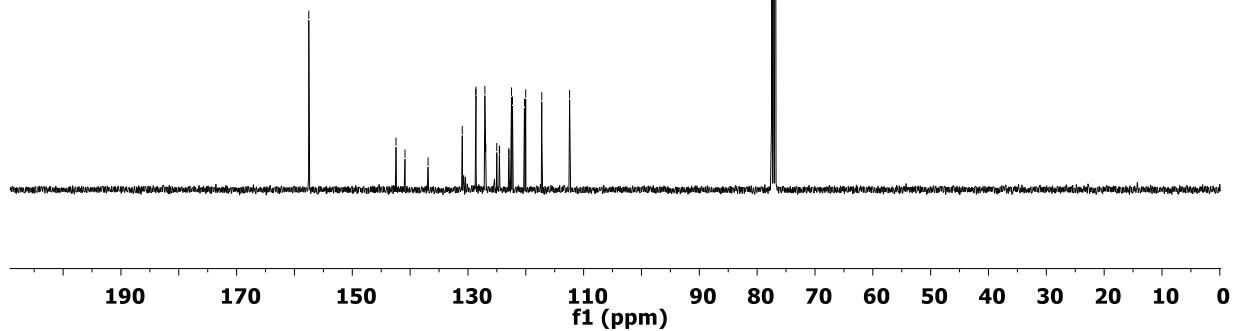

GP-SM-VII-117

8.344  
8.333  
8.159  
8.157  
8.148  
8.140  
8.137  
8.129  
7.998  
7.977  
7.455  
7.444  
7.437  
7.426  
7.423  
7.418  
7.381  
7.379  
7.361  
7.342  
7.339  
7.323  
7.320  
7.260  
7.124  
7.104  
7.066  
7.063  
7.047  
7.045  
6.949  
6.929  
6.874  
6.862  
6.859

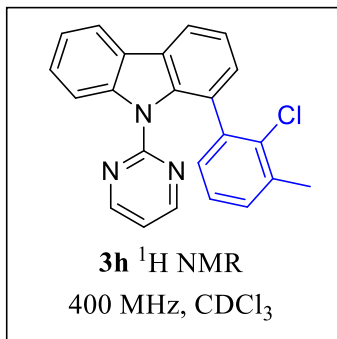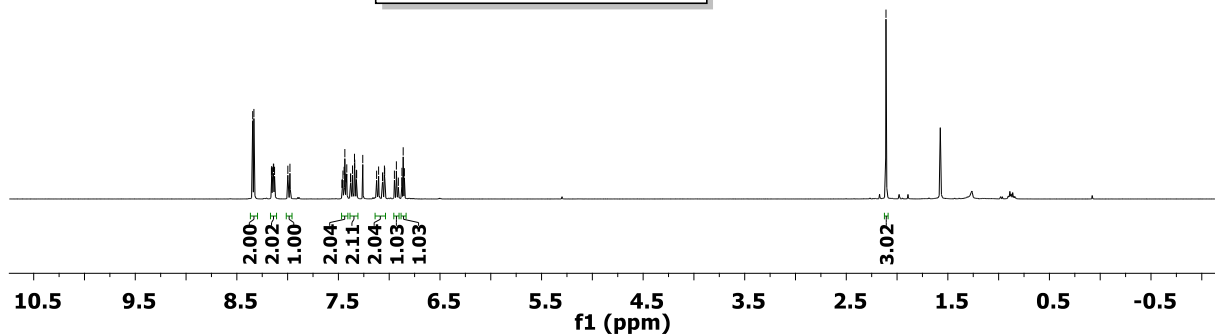

GP-SM-VII-117M

157.292  
157.127  
143.019  
140.708  
137.277  
134.811  
134.046  
128.931  
128.154  
127.583  
127.059  
126.868  
126.391  
126.246  
124.795  
121.991  
121.791  
120.160  
119.608  
117.323  
111.988  
-17.824

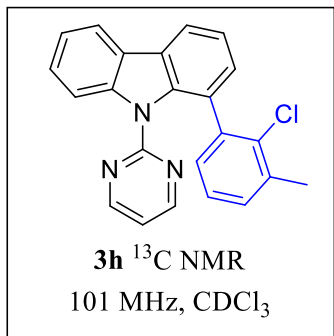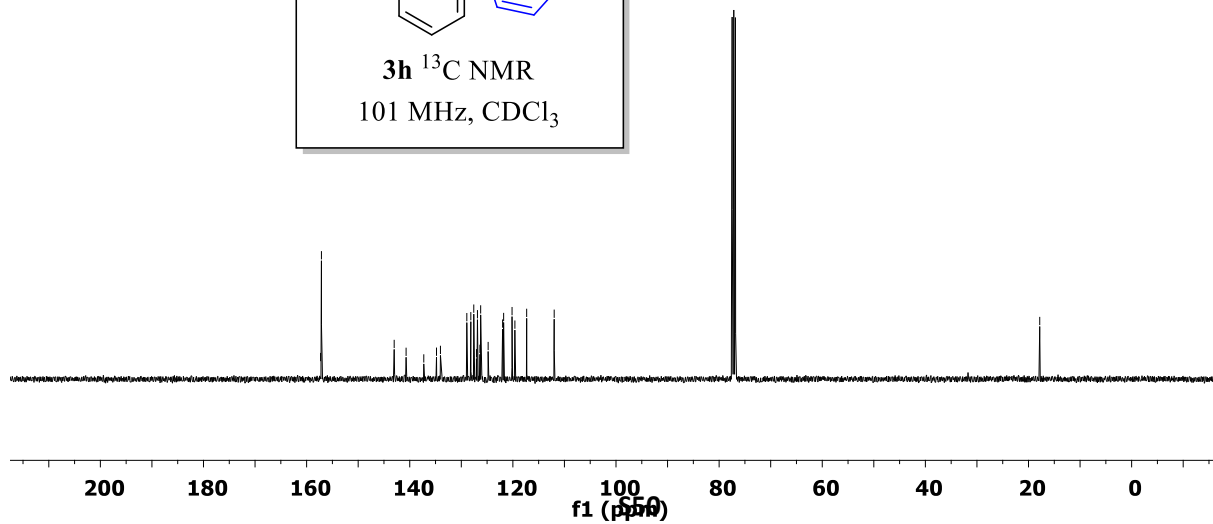

GP-SM-7-126

8.349  
8.337  
8.141  
8.140  
8.138  
8.136  
8.129  
8.118  
8.102  
8.099  
7.996  
7.994  
7.993  
7.976  
7.974  
7.972  
7.450  
7.448  
7.435  
7.432  
7.432  
7.426  
7.426  
7.411  
7.411  
7.408  
7.398  
7.367  
7.365  
7.348  
7.343  
7.343  
7.340  
7.330  
7.327  
7.325  
7.322  
7.322  
7.043  
7.022  
6.567  
6.561  
6.546  
6.540  
6.512  
6.505

2.058  
2.049

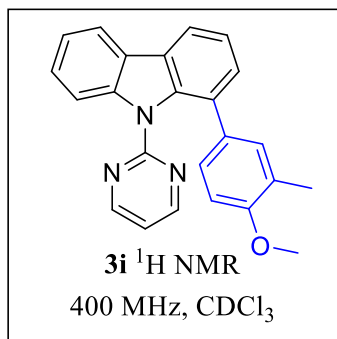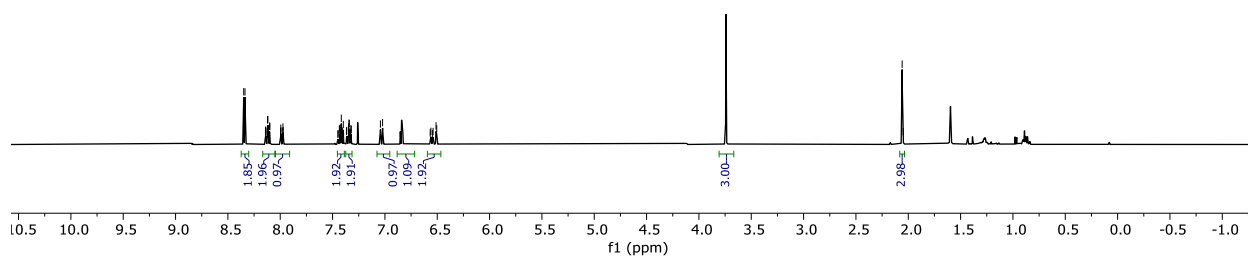

GP-SM-7-126

158.551  
157.433  
157.069  
140.773  
137.731  
136.958  
133.615  
130.558  
129.384  
127.506  
126.662  
126.288  
124.984  
121.844  
121.766  
120.116  
118.970  
116.960  
115.125  
111.917  
110.931

55.430

20.377

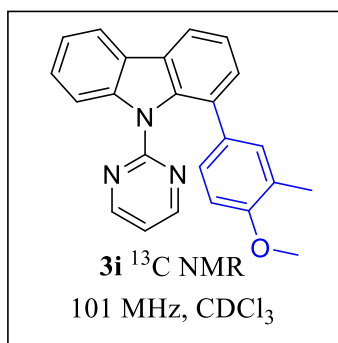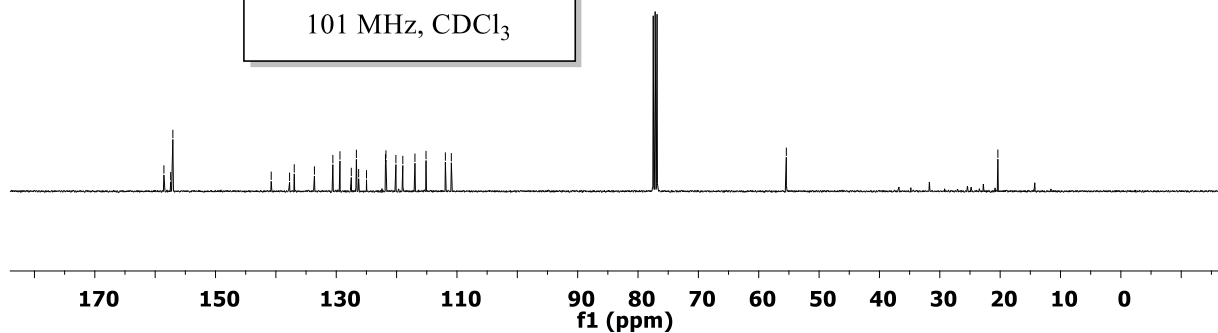

GP-SM-10-96

8.44  
8.42  
8.13  
8.12  
8.11  
8.10  
8.09  
8.08  
7.44  
7.43  
7.42  
6.93  
6.78  
6.75  
6.57  
6.55

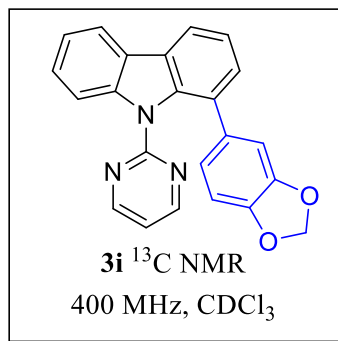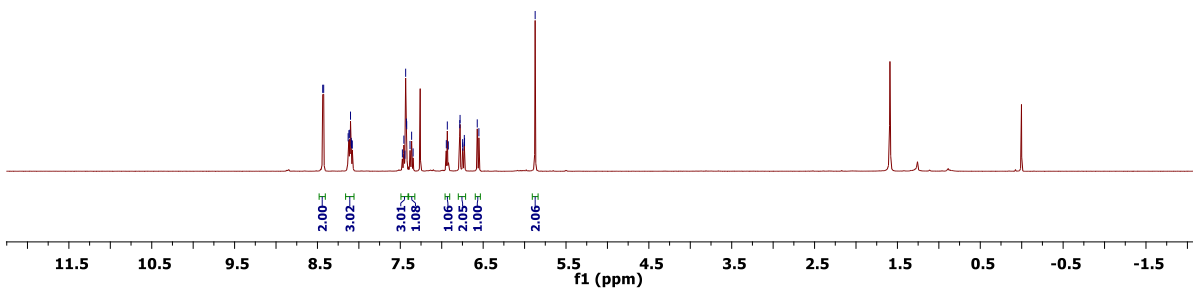

GP-SM-7-139

157.821  
157.397  
147.485  
146.112  
140.969  
137.149  
136.747  
138.503  
128.090  
126.950  
126.835  
125.151  
122.364  
122.089  
121.319  
119.148  
117.111  
116.306  
108.350  
108.021  
100.947

77.160  $\text{CDCl}_3$

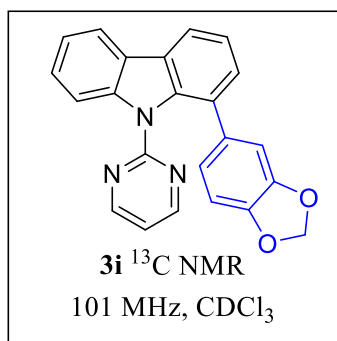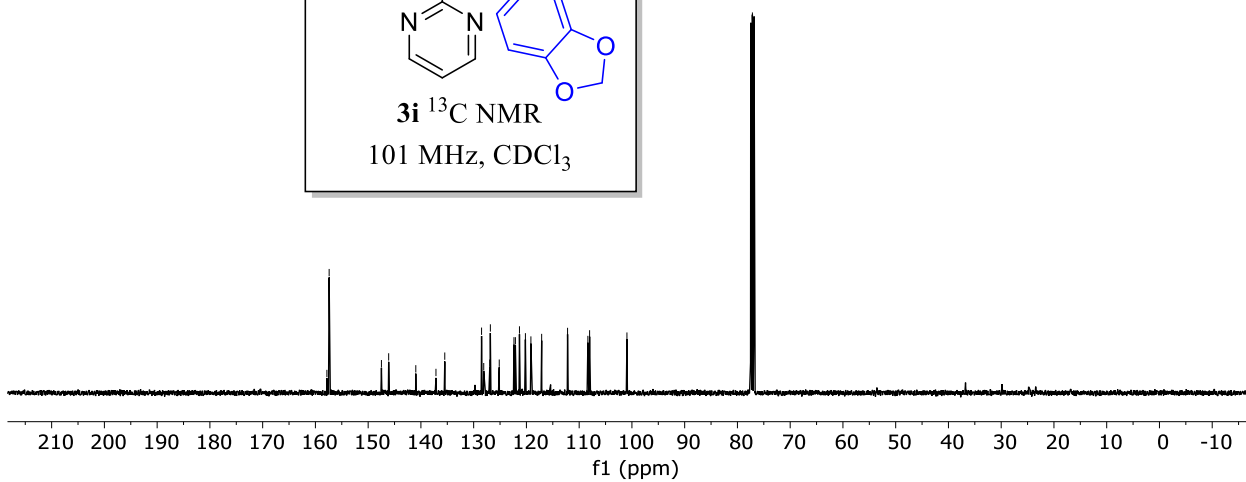

GP-SM-81-149-P

8.34  
8.33  
8.15  
8.13  
8.12  
8.11  
8.10  
7.50  
7.48  
7.47  
7.46  
7.45  
7.38  
7.18  
7.16  
6.93  
6.82  
6.84  
6.83

2.28

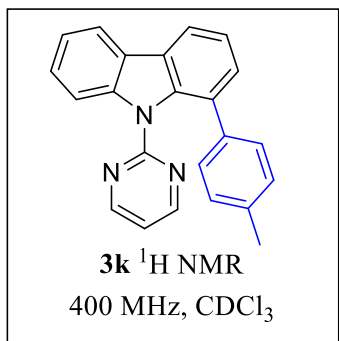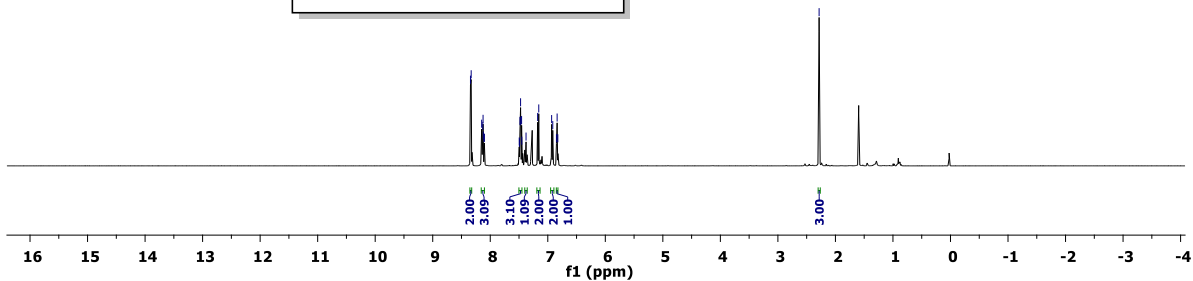

GP-SM-81-149-P

157.21  
156.80  
140.47  
137.97  
136.75  
135.33  
128.26  
128.15  
128.06  
127.00  
126.41  
126.28  
124.73  
121.88  
121.54  
119.69  
118.57  
116.38  
111.72

20.67

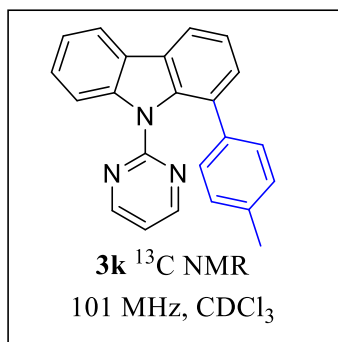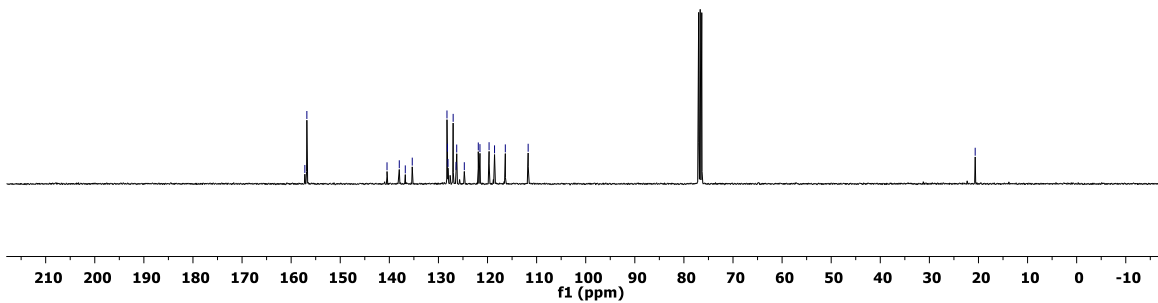

8.259  
8.242  
8.065  
8.045  
8.041  
8.026  
8.023  
8.005  
7.423  
7.419  
7.404  
7.401  
7.386  
7.383  
7.380  
7.377  
7.368  
7.362  
7.359  
7.349  
7.308  
7.306  
7.289  
7.287  
7.181  
7.064  
7.045  
6.982  
6.963  
6.944  
6.941  
6.826  
6.807  
6.806  
6.774  
6.762  
5.079

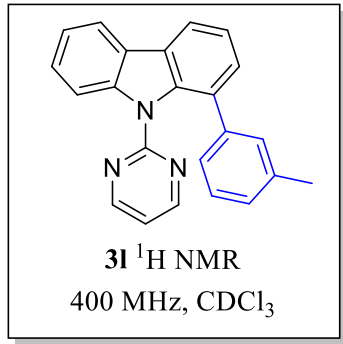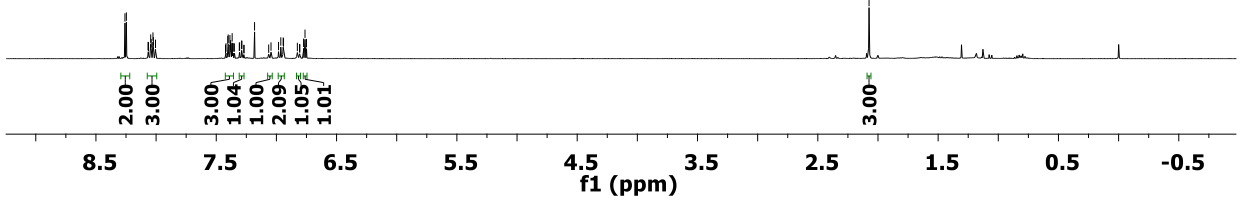

GP-SSM-2

157.517  
157.149  
141.046  
140.722  
137.447  
136.970  
128.491  
128.355  
128.284  
128.023  
126.858  
126.662  
125.429  
124.991  
124.737  
122.196  
121.888  
120.082  
119.102  
116.993  
111.909  
21.076

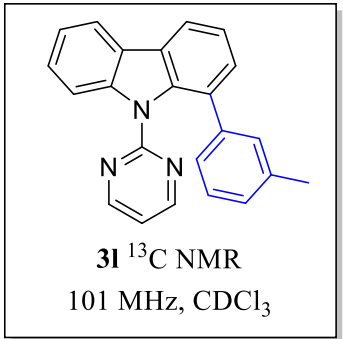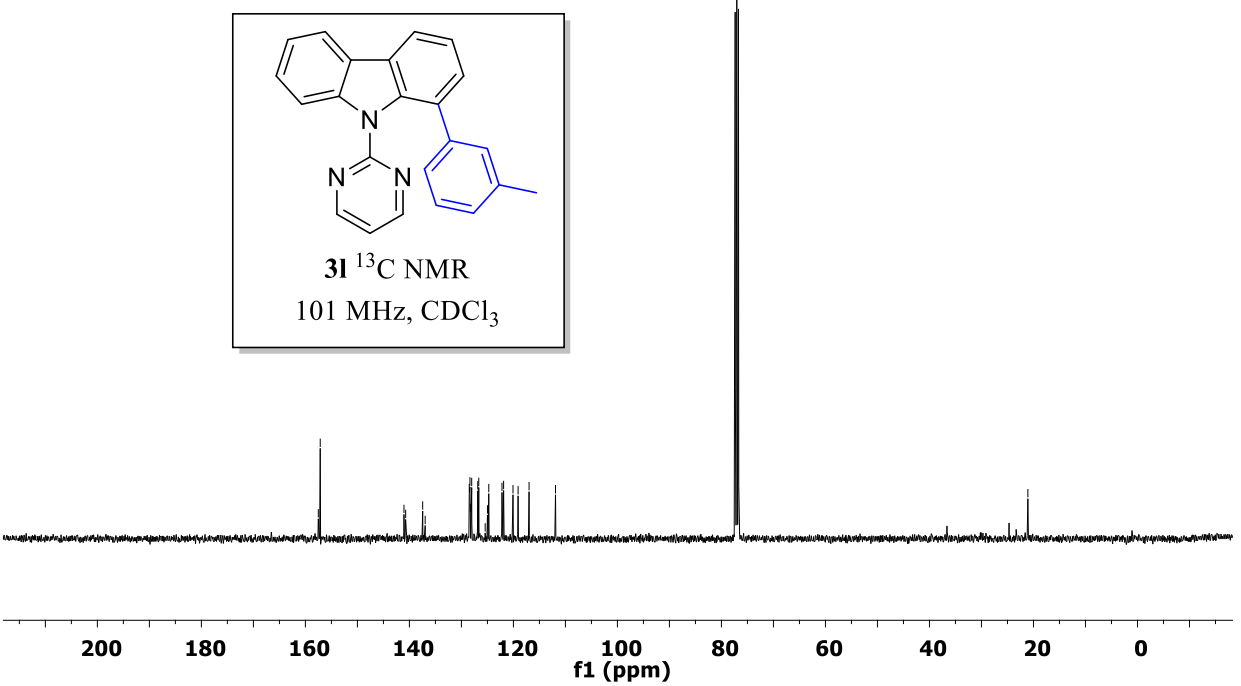

GP-SM-7-160

8.362  
8.350  
8.132  
8.129  
8.109  
8.097  
8.090  
8.082  
8.075  
7.447  
7.441  
7.382  
7.376  
7.378  
7.359  
7.341  
7.260 CDCl<sub>3</sub>  
7.173  
6.883  
6.871  
6.859  
6.665  
6.645

— 3.757

— 1.566

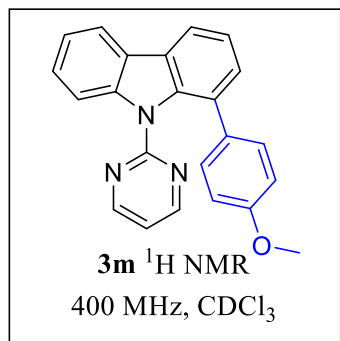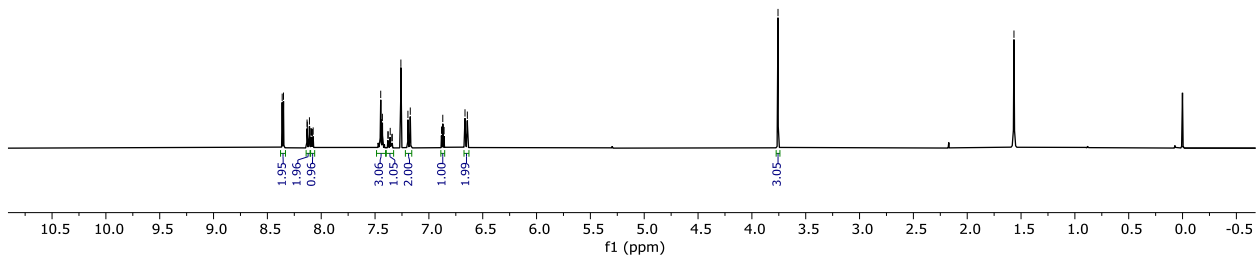

GP-SM-7-160

158.261  
157.678  
157.321  
141.018  
137.230  
133.989  
132.679  
128.627  
128.237  
126.957  
126.775  
125.245  
122.403  
122.062  
120.178  
118.919  
117.015  
113.620  
112.247

— 55.508

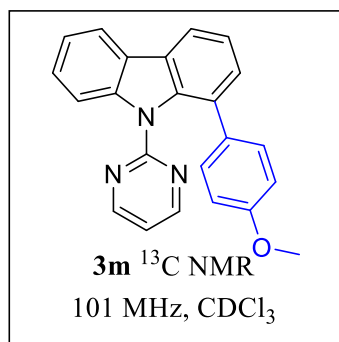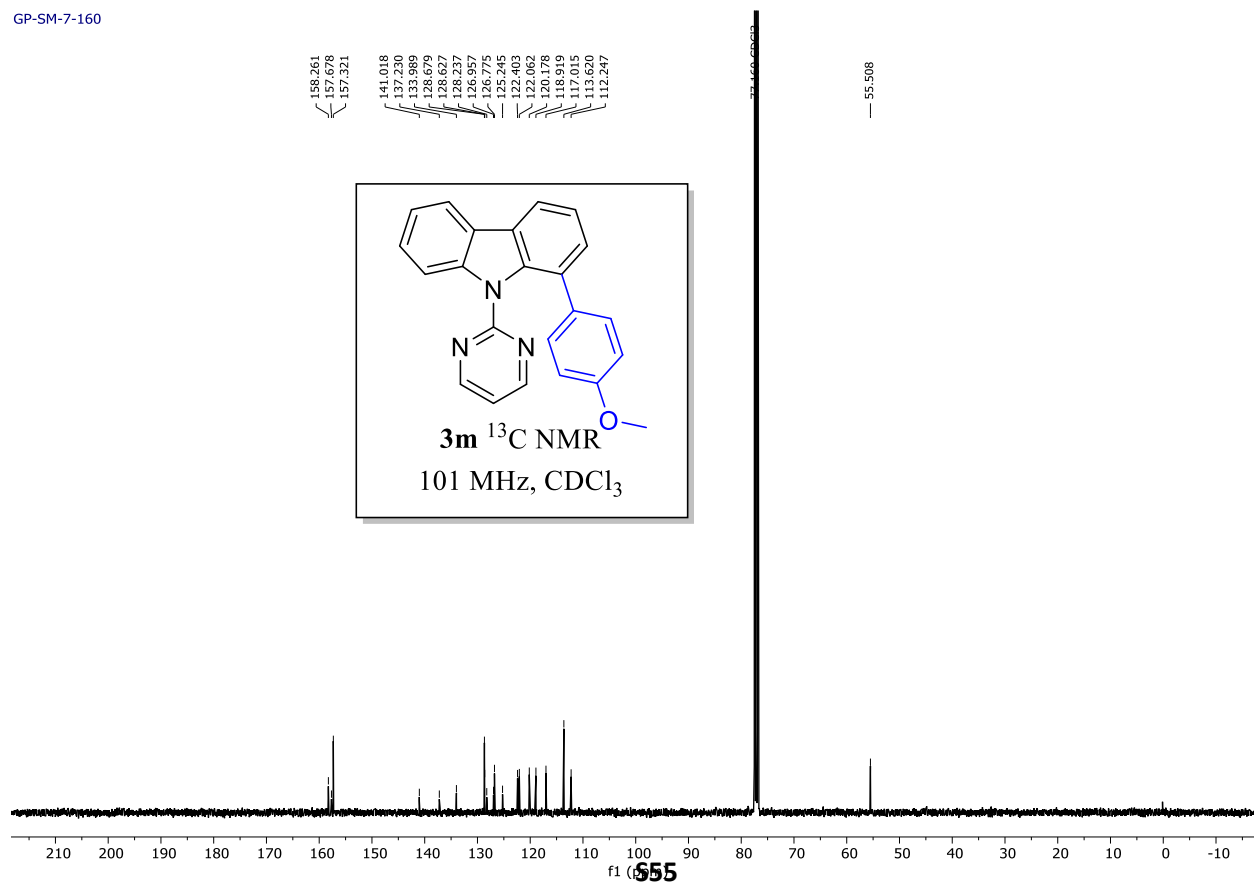

GP-SM-7-140

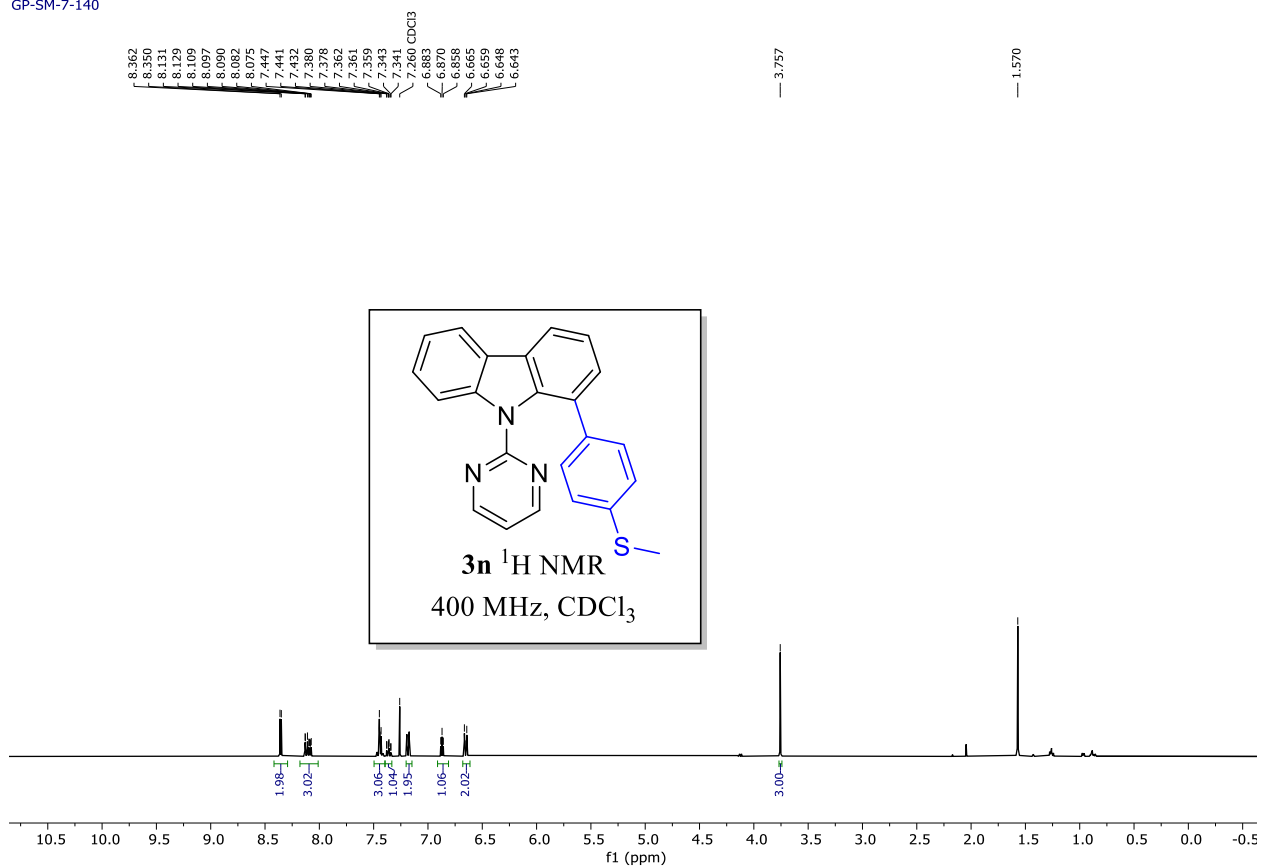

GP-SM-7-140

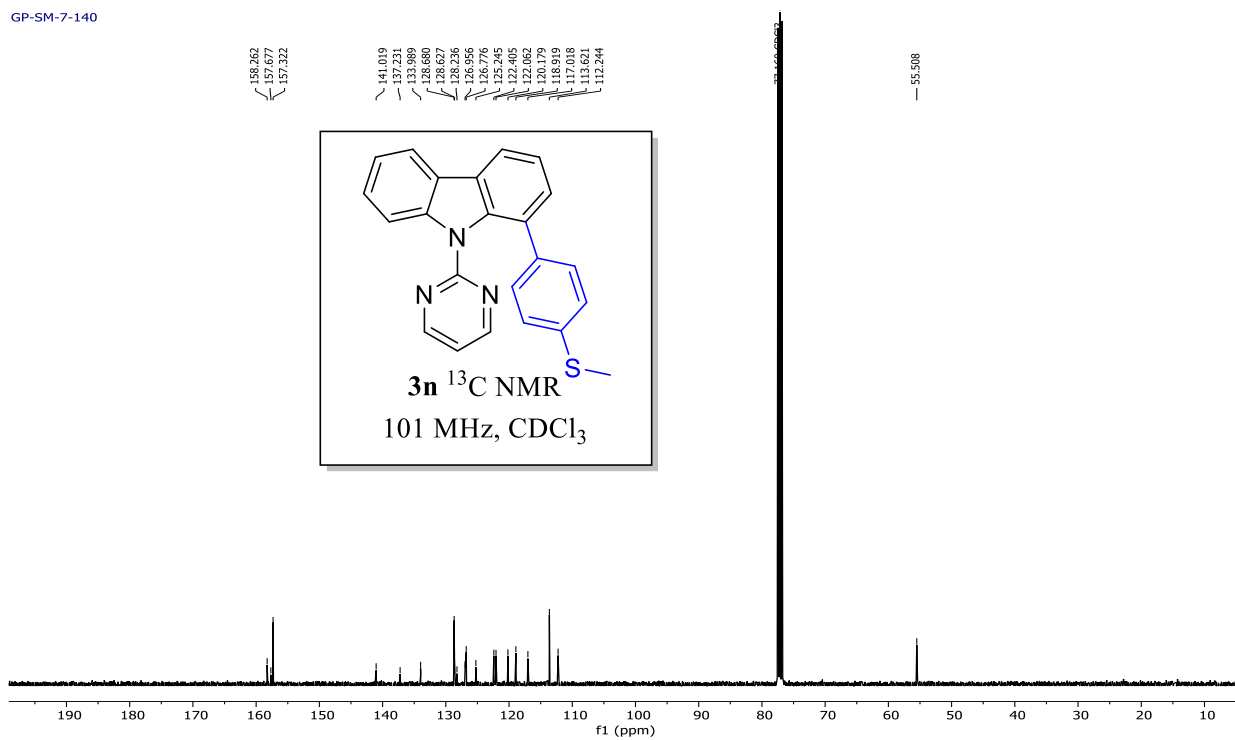



GP-SM-VII-153

8.232  
8.228  
8.213  
8.209  
8.195  
8.185  
8.183  
8.167  
8.165  
8.164  
7.915  
7.913  
7.842  
7.830  
7.730  
7.710  
7.696  
7.696  
7.654  
7.613  
7.527  
7.509  
7.496  
7.382  
7.380  
7.366  
7.362  
7.359  
7.356  
7.354  
7.260 CDCl<sub>3</sub>

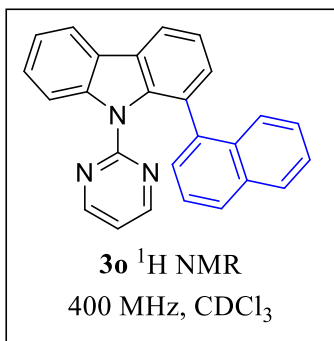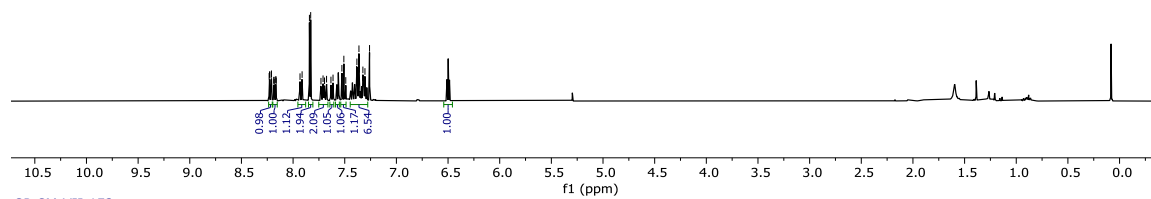

GP-SM-VII-153

157.082  
156.394  
140.618  
139.265  
137.966  
133.446  
130.970  
129.526  
127.671  
127.121  
126.797  
126.648  
126.508  
126.371  
126.206  
126.125  
125.771  
125.426  
124.833  
124.830  
120.130  
119.633  
116.742  
111.981

77.160 CDCl<sub>3</sub>

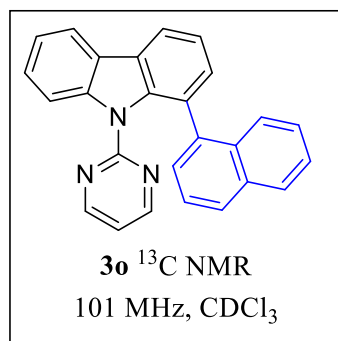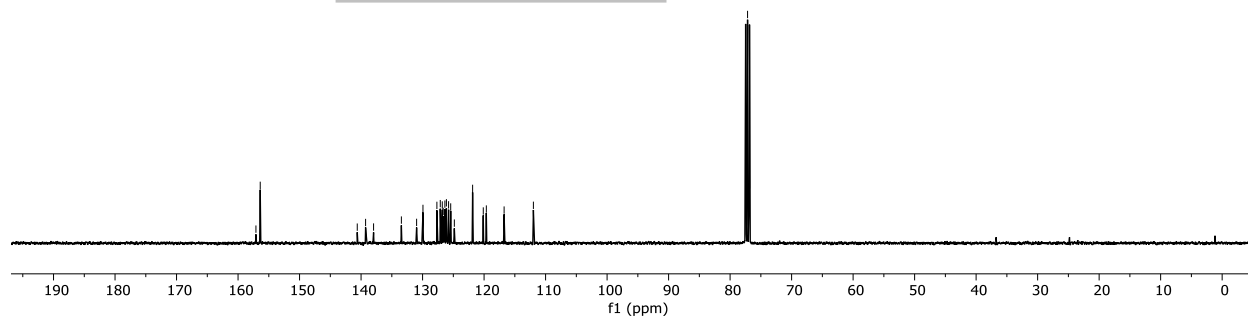

8.18  
8.17  
8.15  
8.15  
8.09  
8.07  
7.87  
7.85  
7.84  
7.83  
7.59  
7.57  
7.57  
7.55  
7.49  
7.48  
7.47  
7.45  
7.45  
7.45  
7.41  
7.31  
7.30  
7.30  
7.33  
7.32  
7.31

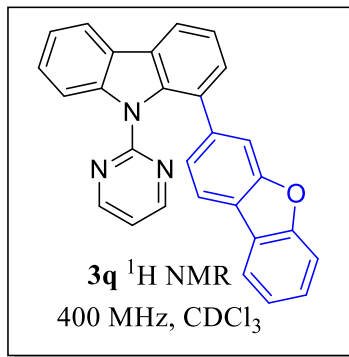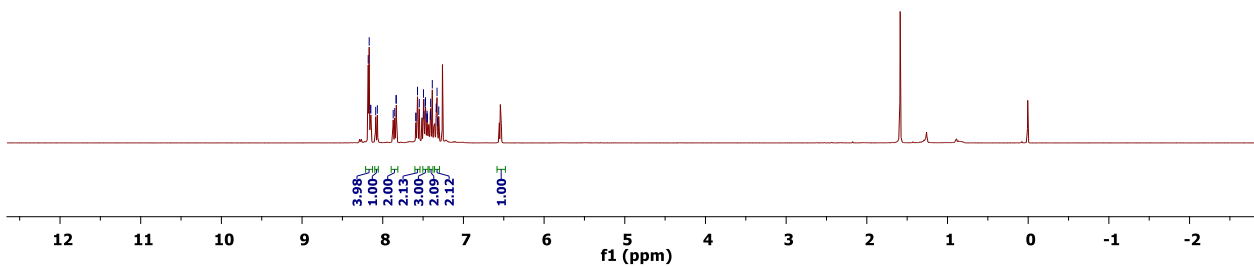

157.50  
157.09  
156.41  
154.74  
140.78  
137.19  
136.02  
128.78  
127.97  
127.19  
126.99  
126.75  
126.75  
124.93  
123.93  
123.86  
122.79  
122.22  
121.92  
120.70  
120.11  
119.60  
119.15  
116.93  
111.88  
111.60  
110.98

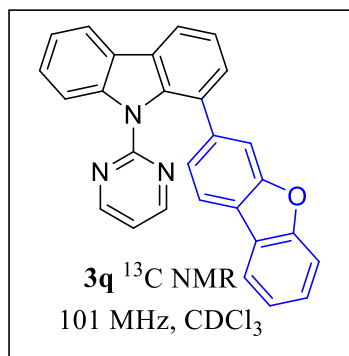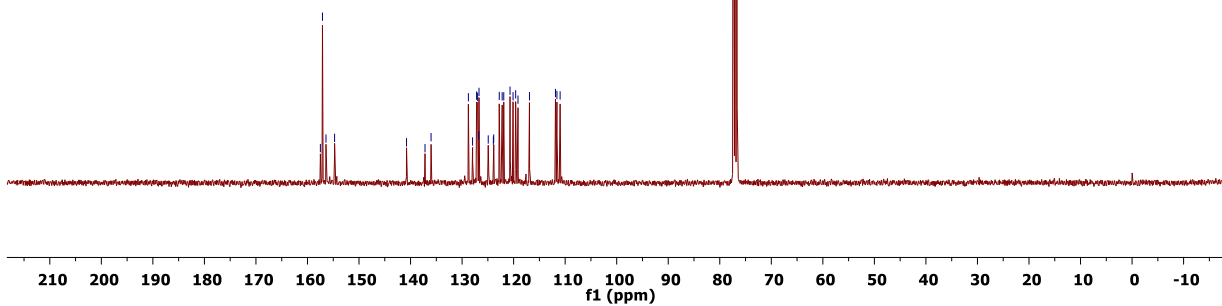

8.276  
8.275  
8.274  
8.258  
8.246  
8.110  
8.108  
8.090  
8.088  
8.064  
8.059  
8.047  
8.042  
7.637  
7.634  
7.618  
7.616  
7.613  
7.548  
7.544  
7.528  
7.524  
7.427  
7.414  
7.409  
7.398  
7.392  
7.379  
7.376  
7.374  
7.363  
7.360  
7.290  
7.287  
7.276  
7.272  
7.220  
7.215  
7.214  
7.205  
7.200  
7.196  
7.182  
7.049  
7.035  
7.031  
7.026  
7.021  
7.016  
7.012  
7.002  
6.766  
6.754  
6.742

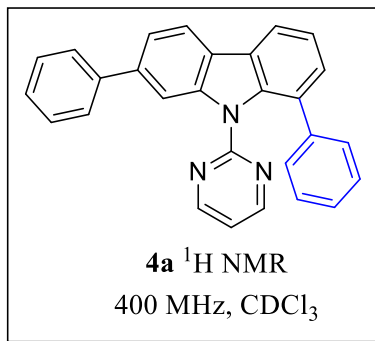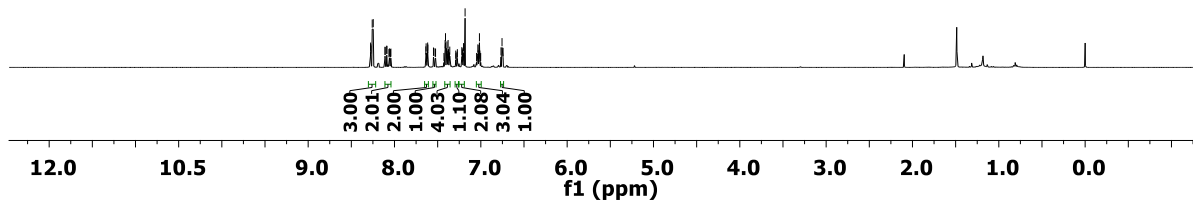

GP-SM-08-122  
157.472  
157.296  
142.041  
141.363  
141.250  
140.228  
137.504  
130.438  
128.712  
128.627  
128.002  
127.630  
127.531  
127.106  
126.611  
126.088  
124.301  
122.427  
121.638  
120.278  
119.211  
116.998  
110.820

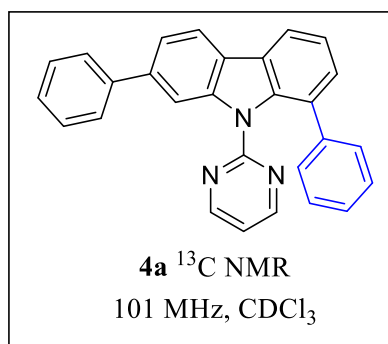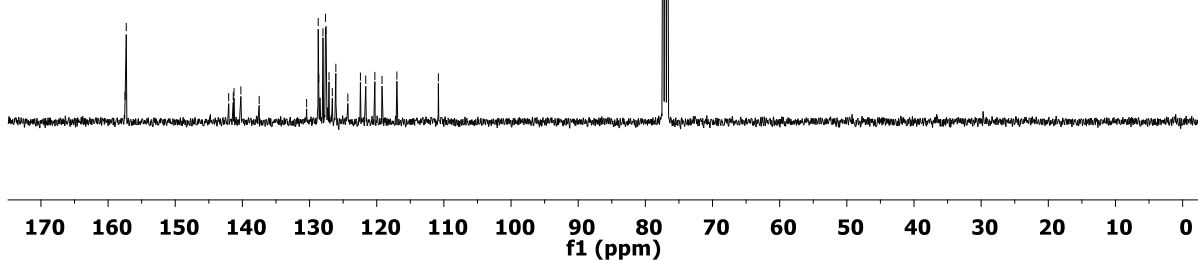

8.346  
8.346  
8.346  
8.336  
8.318  
8.175  
8.174  
8.155  
8.154  
8.137  
8.132  
8.120  
8.115  
7.653  
7.648  
7.637  
7.632  
7.619  
7.615  
7.599  
7.595  
7.502  
7.489  
7.485  
7.484  
7.468  
7.449  
7.357  
7.340  
7.336  
7.319  
7.303  
7.298  
7.293  
7.283  
7.279  
7.260  
7.128  
7.113  
7.109  
7.105  
7.099  
7.094  
7.090  
7.080  
7.077  
6.835  
6.823  
6.811  
2.973  
2.955  
1.316  
1.299

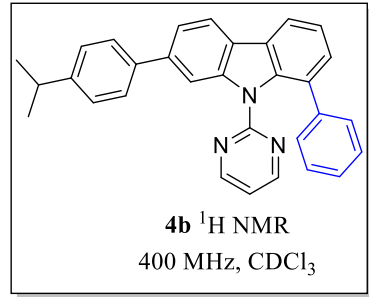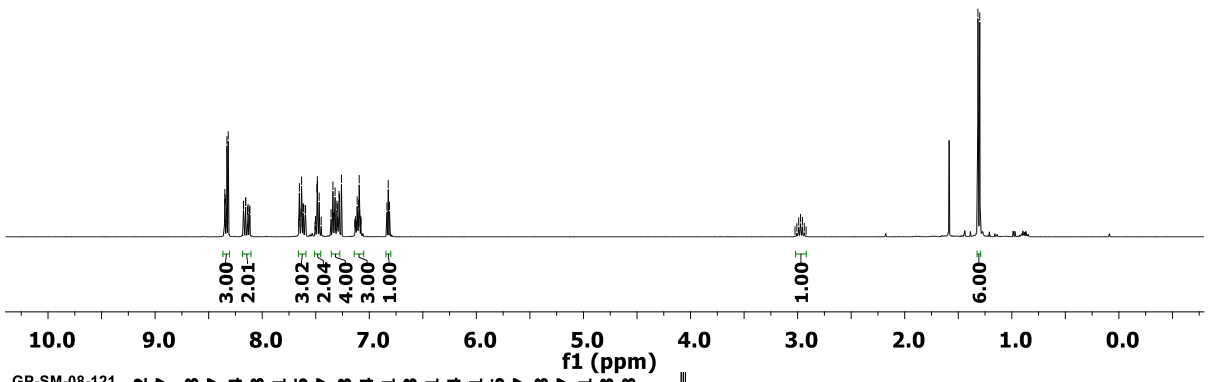

GP-SM-08-121  
157.502  
157.277  
147.878  
141.397  
141.284  
140.248  
139.581  
137.475  
128.857  
128.523  
128.444  
127.991  
127.553  
126.811  
126.694  
126.071  
124.076  
122.397  
121.568  
120.217  
119.161  
116.953  
110.688  
33.839  
24.069

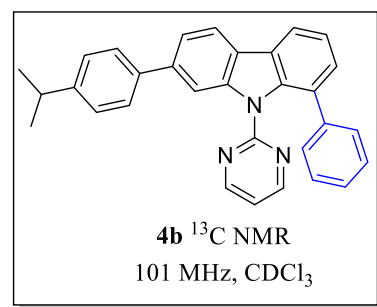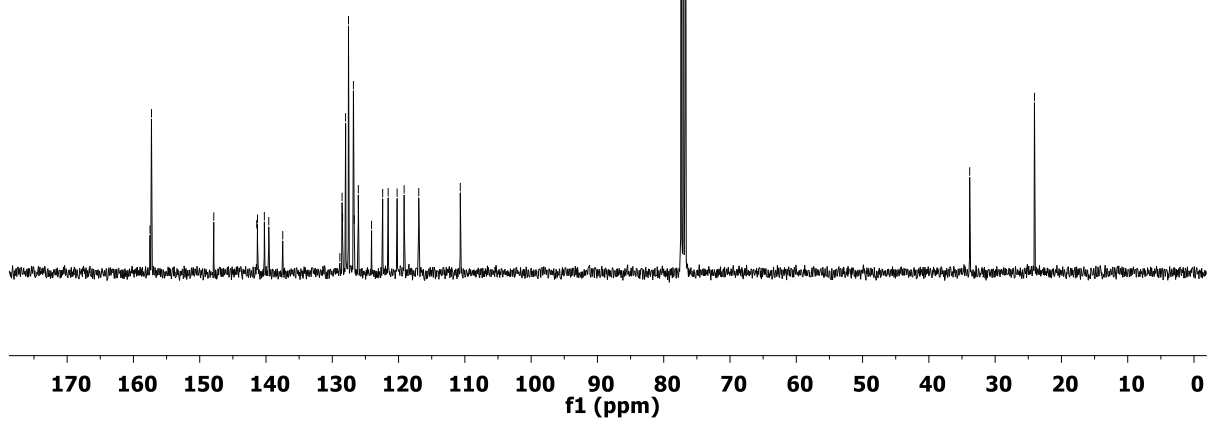

GP  
 8.336  
 8.332  
 8.331  
 8.316  
 8.176  
 8.150  
 8.134  
 8.128  
 8.117  
 8.111  
 7.611  
 7.607  
 7.596  
 7.591  
 7.587  
 7.499  
 7.486  
 7.482  
 7.465  
 7.447  
 7.299  
 7.295  
 7.290  
 7.279  
 7.276  
 7.260  
 7.133  
 7.126  
 7.111  
 7.108  
 7.103  
 7.097  
 7.093  
 7.088  
 7.078  
 7.075  
 6.837  
 6.825  
 6.809

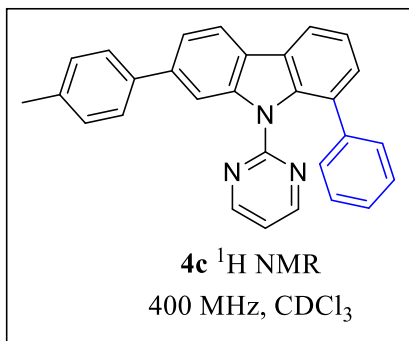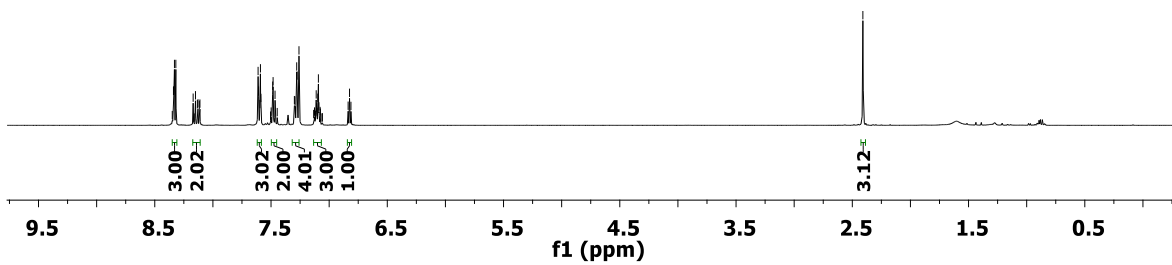

GP-SM-2Me-Carb  
 157.496  
 157.274  
 141.402  
 141.283  
 140.210  
 139.170  
 137.482  
 136.863  
 129.436  
 128.529  
 128.459  
 127.989  
 127.539  
 127.453  
 126.689  
 126.069  
 124.090  
 122.400  
 121.504  
 120.219  
 119.152  
 116.957  
 110.610

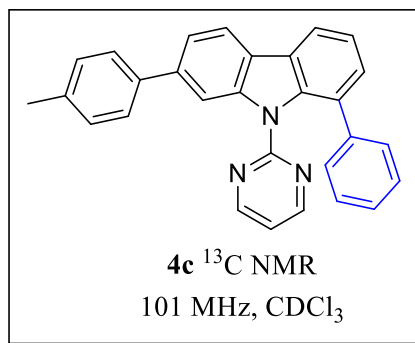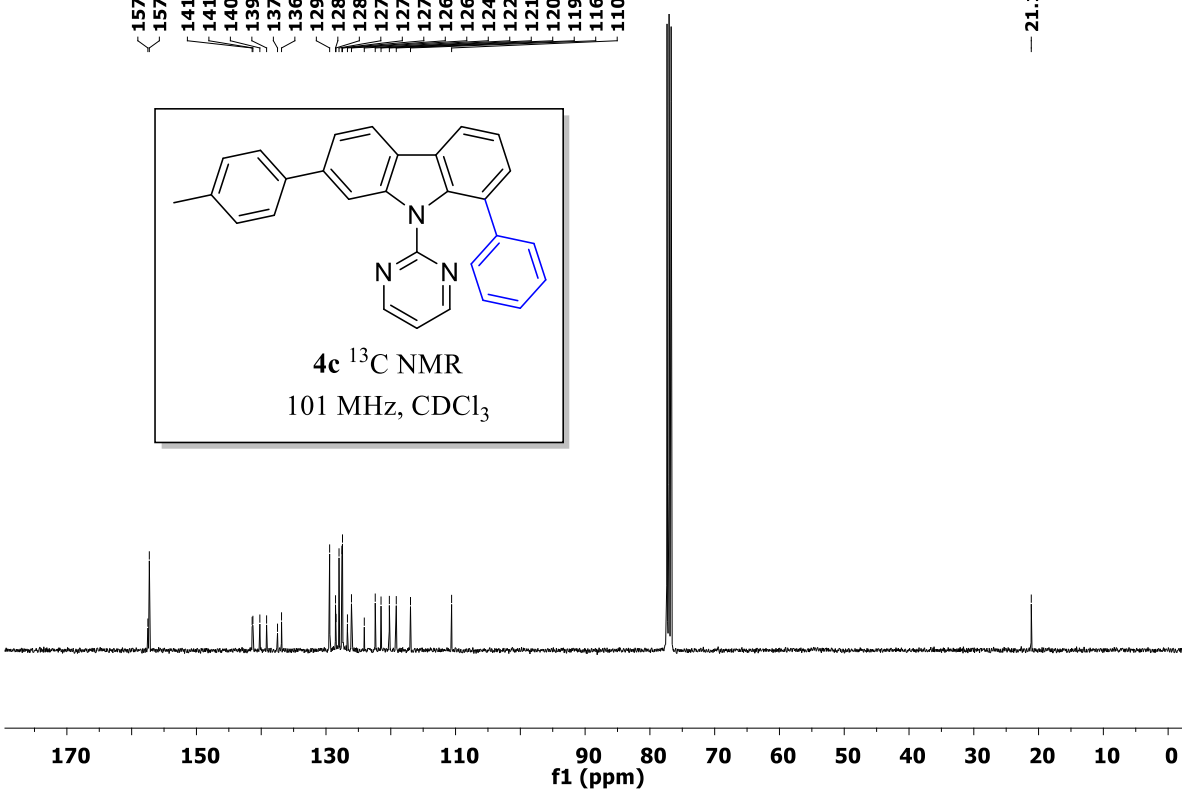

8.276  
8.266  
8.265  
8.266  
8.139  
8.137  
8.122  
8.117  
8.105  
8.100  
7.567  
7.564  
7.547  
7.544  
7.484  
7.470  
7.465  
7.464  
7.446  
7.441  
7.427  
7.422  
7.342  
7.328  
7.326  
7.324  
7.322  
7.308  
7.303  
7.293  
7.288  
7.277  
7.273  
7.269  
7.236  
7.088  
7.084  
7.074  
7.072  
7.070  
7.068  
7.063  
7.060  
7.053  
7.044  
7.041  
7.005  
7.003  
6.984  
6.982  
6.775  
6.763  
6.751  
3.791

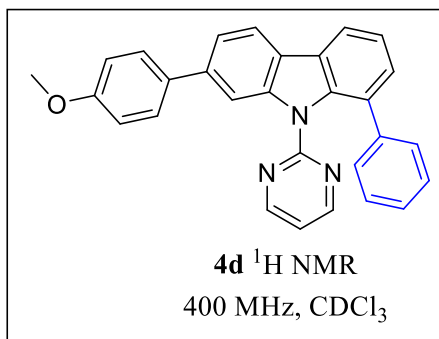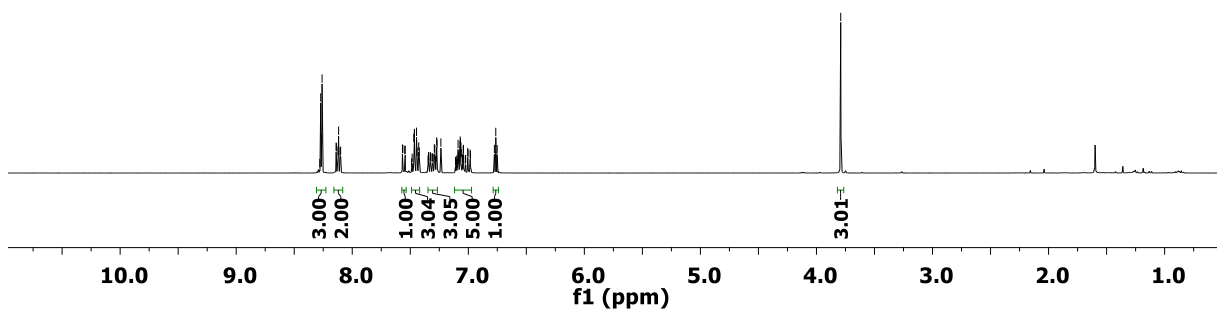

GP-SM-08-122

157.547  
157.189  
156.668  
141.367  
140.988  
137.402  
131.597  
131.366  
128.546  
128.467  
127.969  
127.540  
126.854  
126.037  
124.038  
123.963  
122.319  
120.819  
119.309  
119.150  
116.824  
113.152  
111.379  
55.703

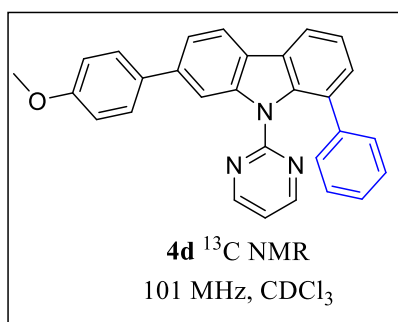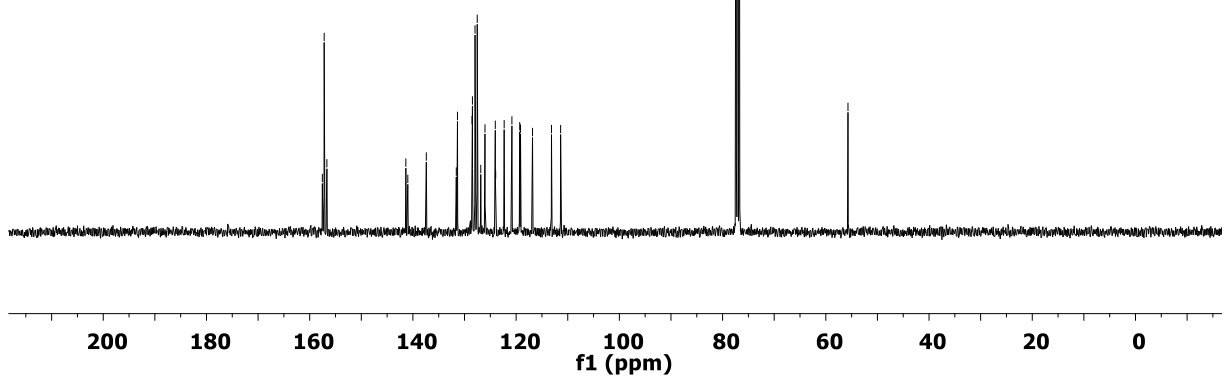

8.249  
8.232  
8.228  
8.016  
8.002  
7.992  
7.988  
7.908  
7.888  
7.440  
7.436  
7.421  
7.417  
7.414  
7.403  
7.397  
7.393  
7.384  
7.365  
7.181  
7.170  
7.164  
7.159  
7.157  
7.155  
7.150  
7.146  
7.048  
7.038  
7.034  
7.025  
7.021  
7.018  
7.011  
7.007  
7.000  
6.995  
6.787  
6.775  
6.762

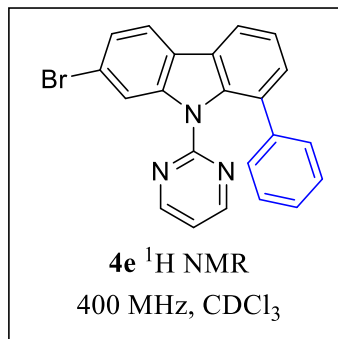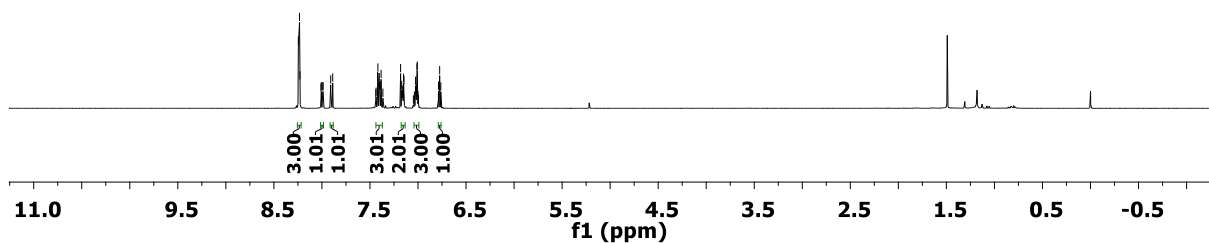

GP-SM-8-102-19  
157.329  
157.062  
141.455  
140.994  
137.041  
129.025  
128.595  
128.029  
127.497  
126.203  
126.073  
125.142  
124.024  
122.634  
121.174  
120.237  
119.141  
117.255  
115.405

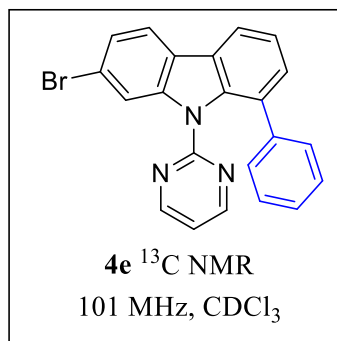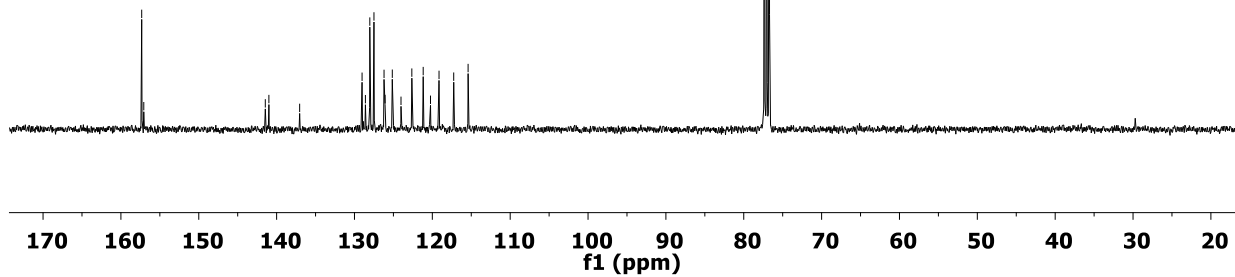

GP-PM-458-A

8.325  
8.313  
8.148  
8.144  
8.062  
8.078  
8.064  
8.060  
8.036  
8.016  
7.506  
7.502  
7.488  
7.483  
7.479  
7.461  
7.442  
7.351  
7.346  
7.330  
7.326  
7.260 CDCl<sub>3</sub>  
7.249  
7.244  
7.241  
7.229  
7.225  
7.105  
7.103  
7.082  
7.086  
7.085  
6.870  
6.858  
6.846

— 1.583

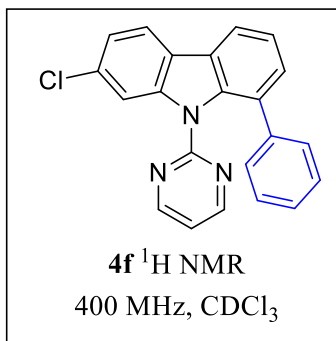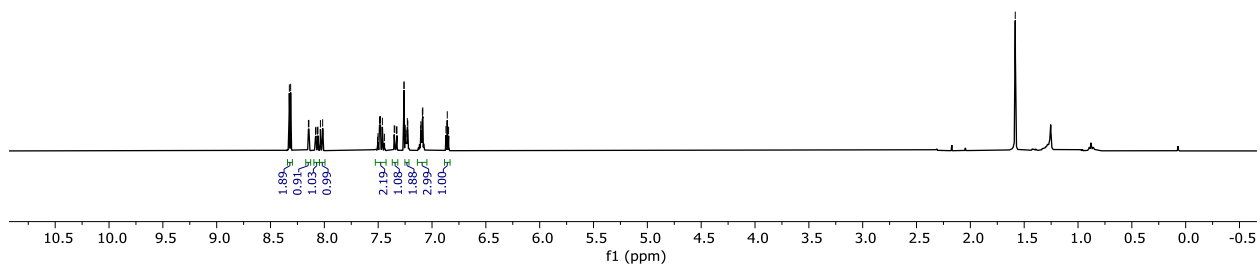

GP-PM-458-A

157.455  
157.221  
141.382  
141.149  
137.505  
137.503  
128.013  
128.162  
127.628  
126.329  
126.212  
122.759  
122.560  
120.977  
119.248  
117.935  
112.667

— 77.160 CDCl<sub>3</sub>

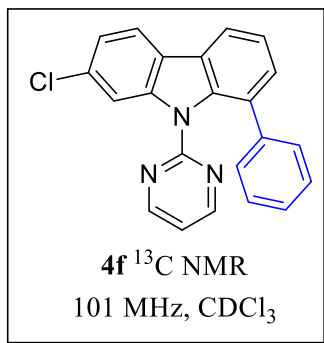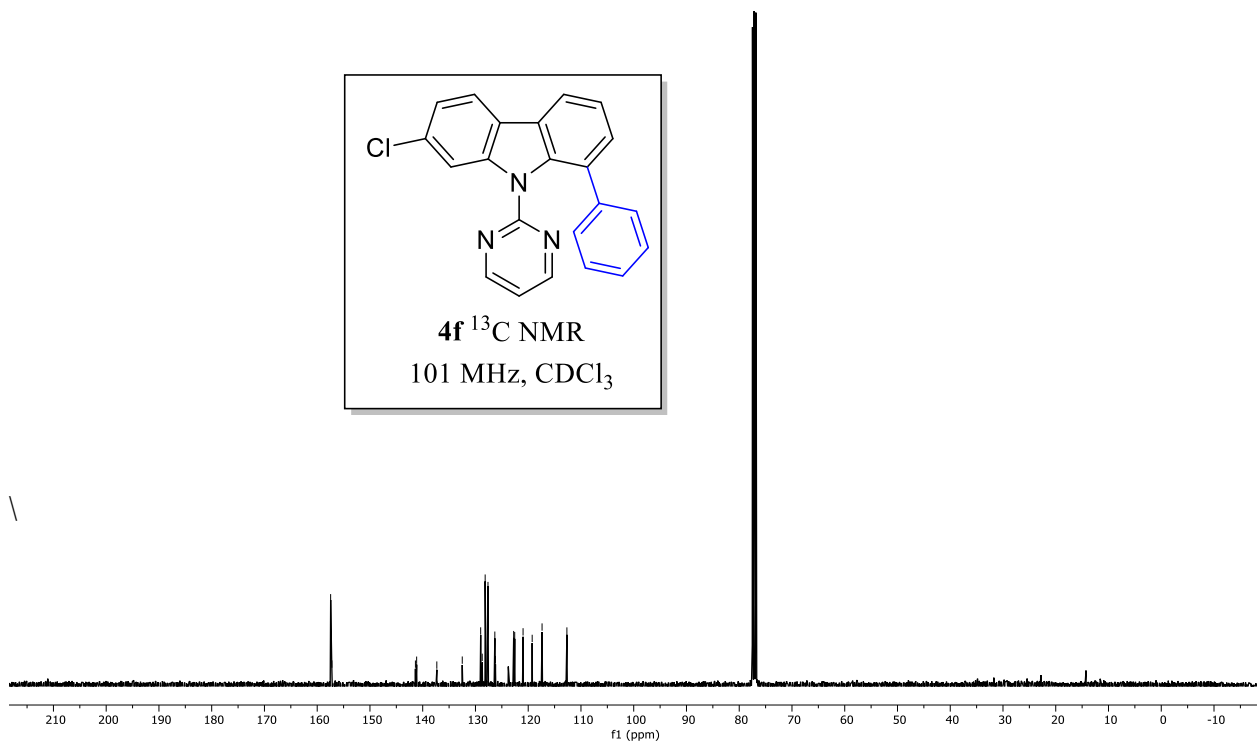



GP-SM-08-92

8.334  
8.229  
8.217  
8.110  
8.089  
8.056  
8.053  
8.037  
8.034  
7.536  
7.535  
7.516  
7.514  
7.466  
7.463  
7.448  
7.444  
7.411  
7.392  
7.373  
7.153  
7.146  
7.142  
7.139  
7.134  
7.129  
7.017  
7.013  
7.005  
6.999  
6.992  
6.987  
6.982  
6.980  
6.976  
6.760  
6.748  
6.736

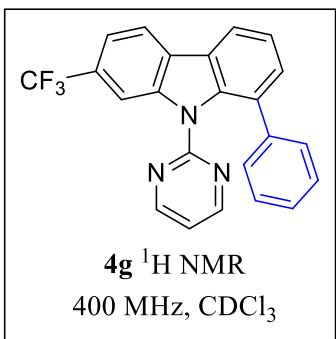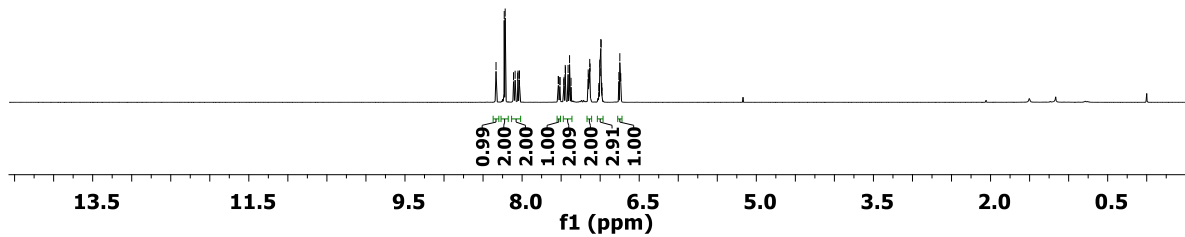

GP-SM-08-92

155.504  
155.070  
138.928  
138.130  
136.003  
127.916  
126.839  
126.715  
126.397  
126.168  
125.824  
125.573  
124.393  
123.733  
120.830  
118.457  
117.834  
116.820  
116.784  
115.520  
107.867  
107.824

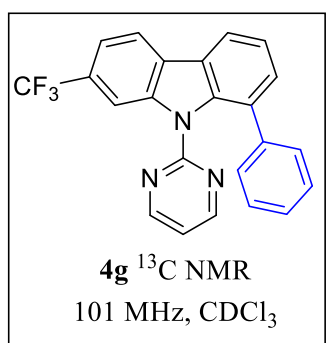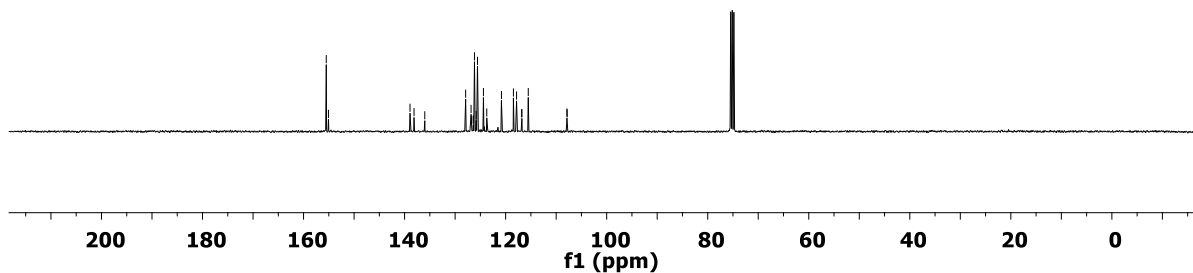

GP  
 8.324  
 8.314  
 8.076  
 8.065  
 8.061  
 8.054  
 8.008  
 7.989  
 7.928  
 7.926  
 7.924  
 7.445  
 7.438  
 7.429  
 7.271  
 7.266  
 7.264  
 7.260  
 7.257  
 7.254  
 7.251  
 7.247  
 7.202  
 7.200  
 7.199  
 7.182  
 7.180  
 7.098  
 7.096  
 7.093  
 7.084  
 7.079  
 7.075  
 6.834  
 6.822  
 5.819

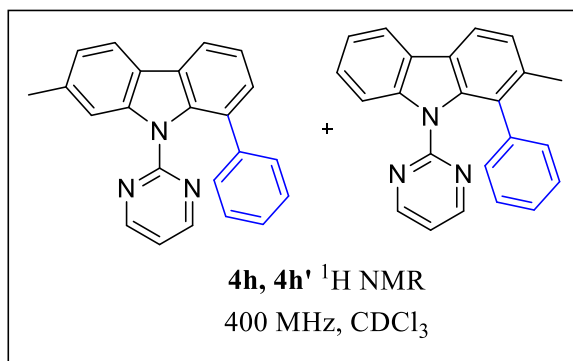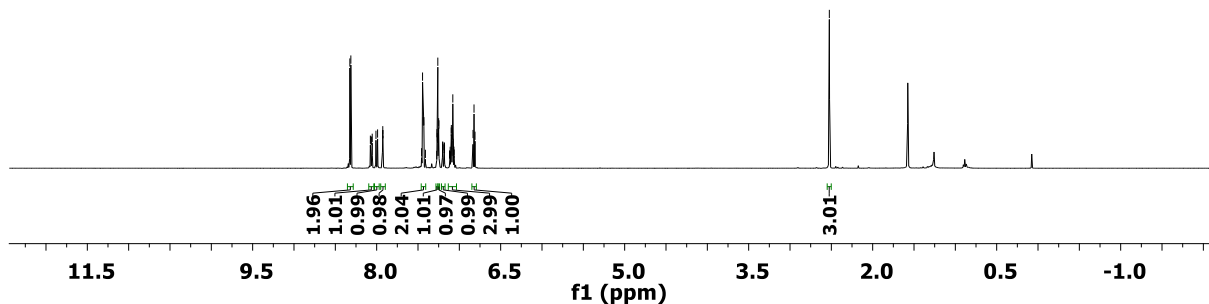

GP-SM-08-101

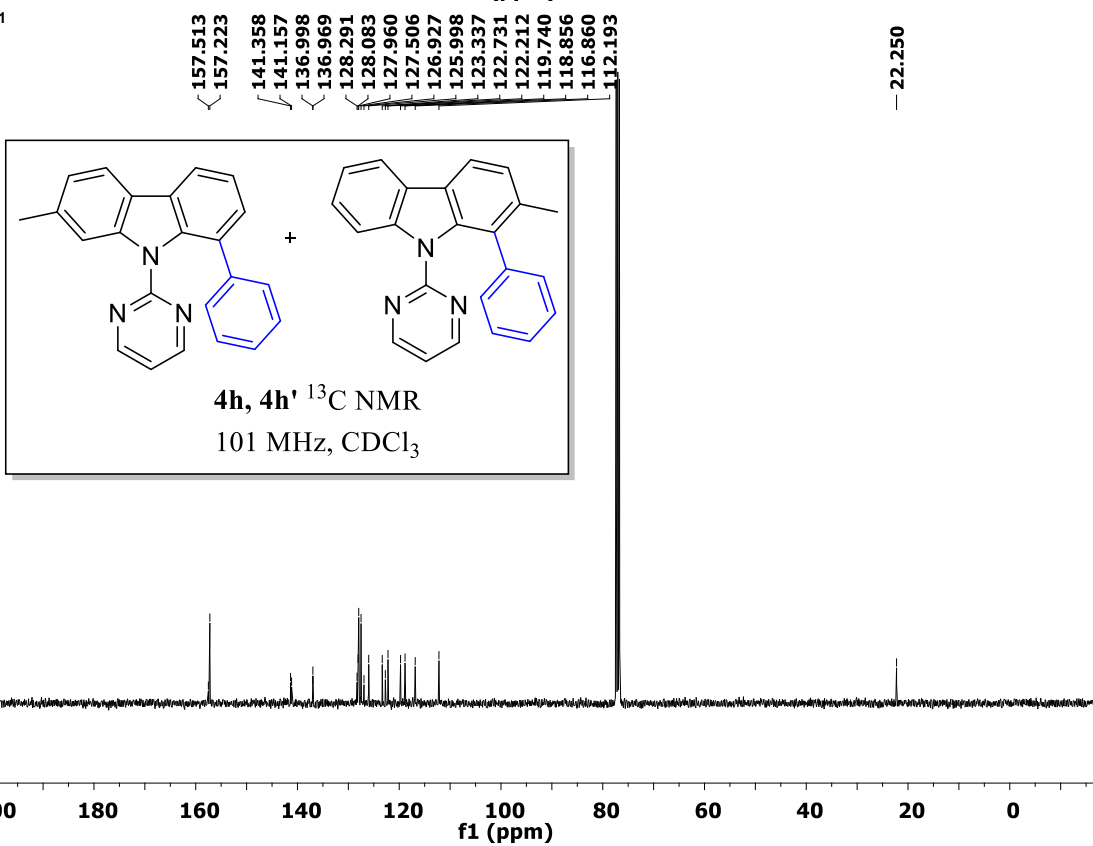

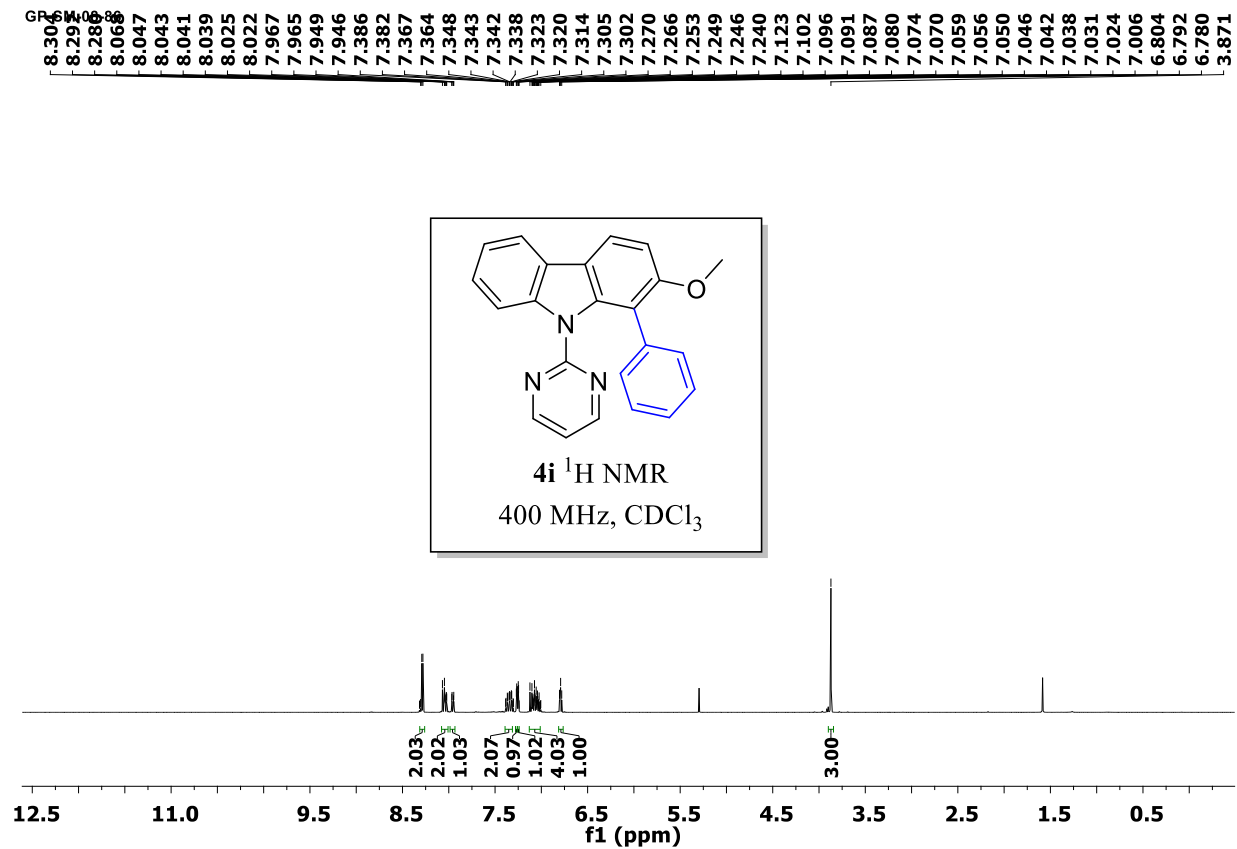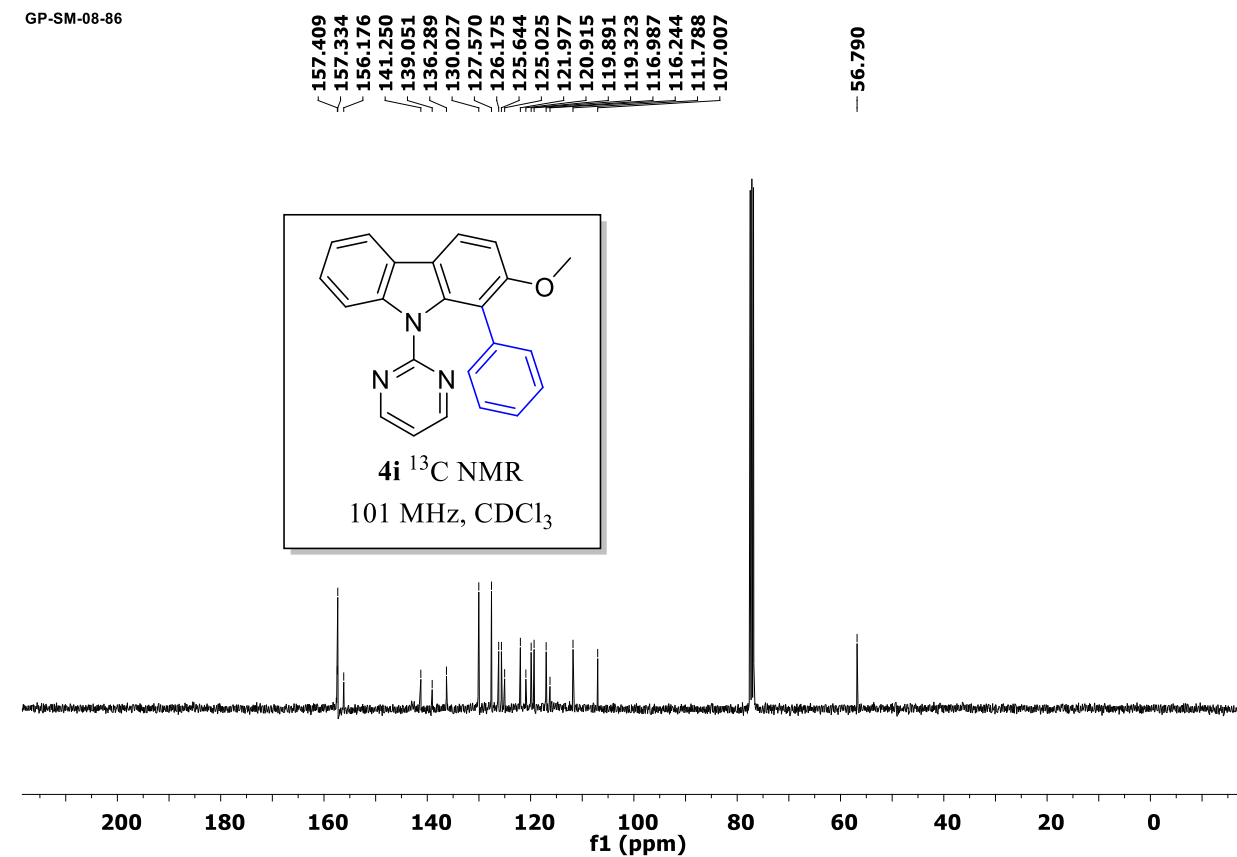

GP-SM-7-27

8.298  
8.286  
8.114  
8.096  
8.076  
7.457  
7.454  
7.438  
7.436  
7.418  
7.415  
7.364  
7.362  
7.346  
7.343  
7.327  
7.325  
7.260  
7.230  
7.226  
7.221  
7.210  
7.206  
7.092  
7.085  
7.070  
7.052  
7.047  
7.033  
7.031  
6.808  
6.796  
6.784

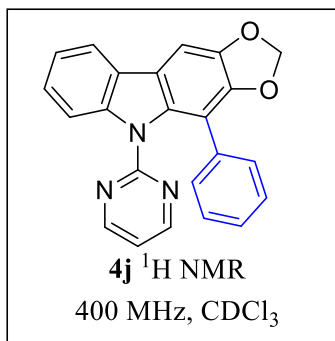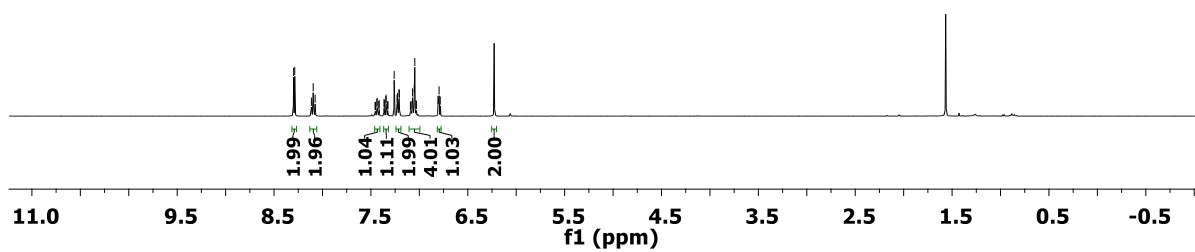

GP-SM-7-27

157.582  
157.214  
143.259  
141.523  
141.156  
140.414  
128.003  
127.575  
126.796  
125.816  
122.319  
122.111  
116.770  
111.937  
109.240

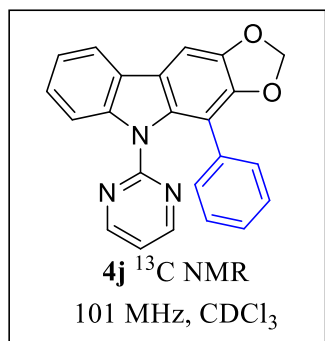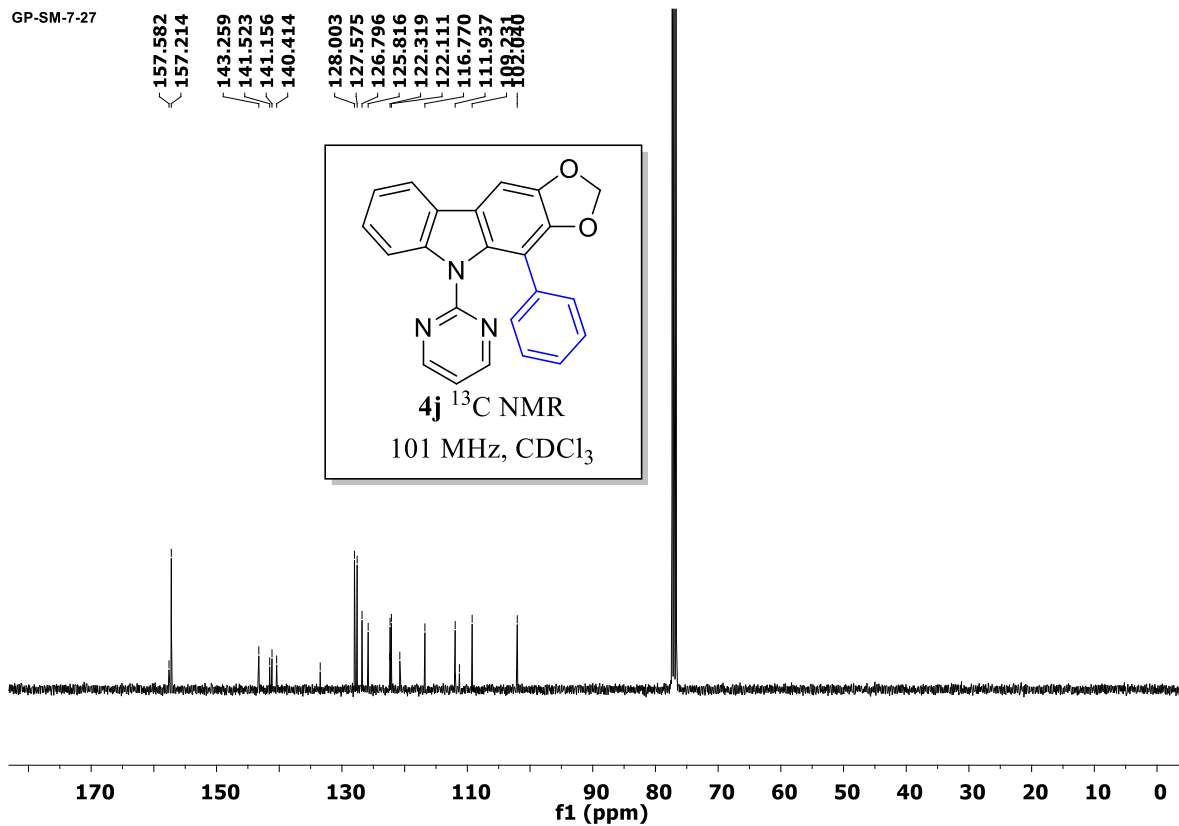

GP-SM-09-III-I

8.45  
8.45  
8.44  
8.43  
8.33  
8.32  
8.09  
8.07  
7.43  
7.43  
7.41  
7.23  
7.22  
7.08  
7.06  
6.95  
6.93  
6.92

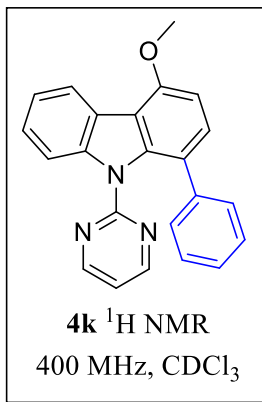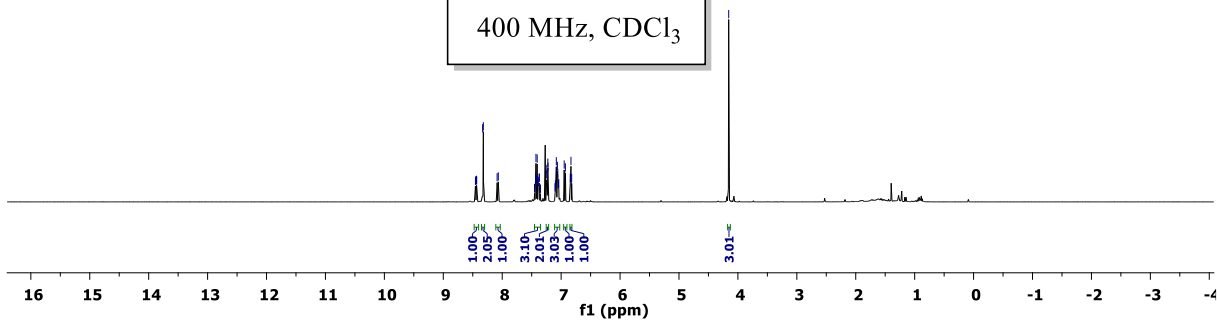

GP-SM-09-III-I

157.49  
157.27  
155.55  
141.22  
140.04  
138.10  
129.23  
127.63  
127.54  
125.74  
125.55  
124.30  
123.19  
122.03  
117.06  
113.38  
55.68

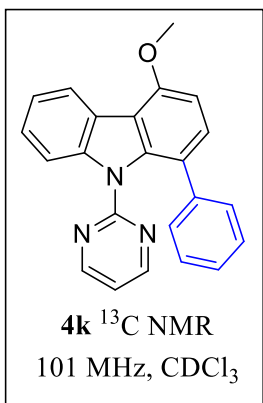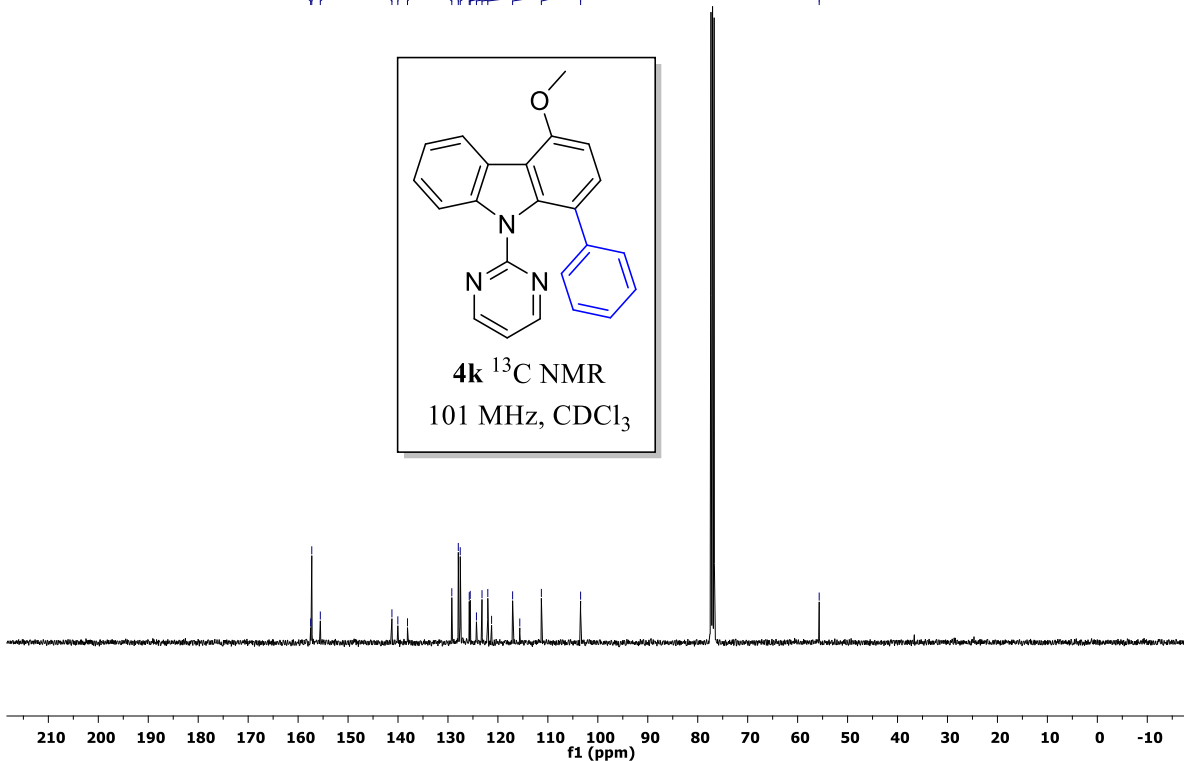

GP-SS-2-46

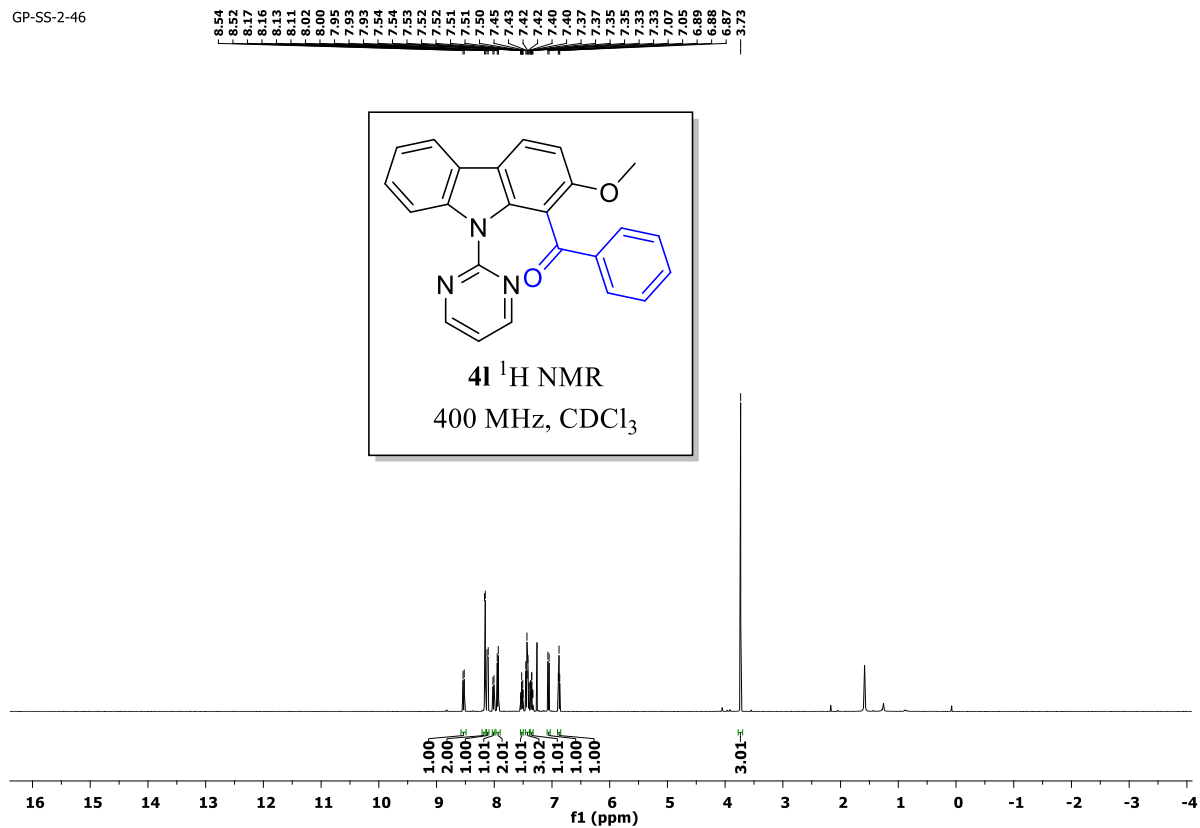

GP-SM-10-24

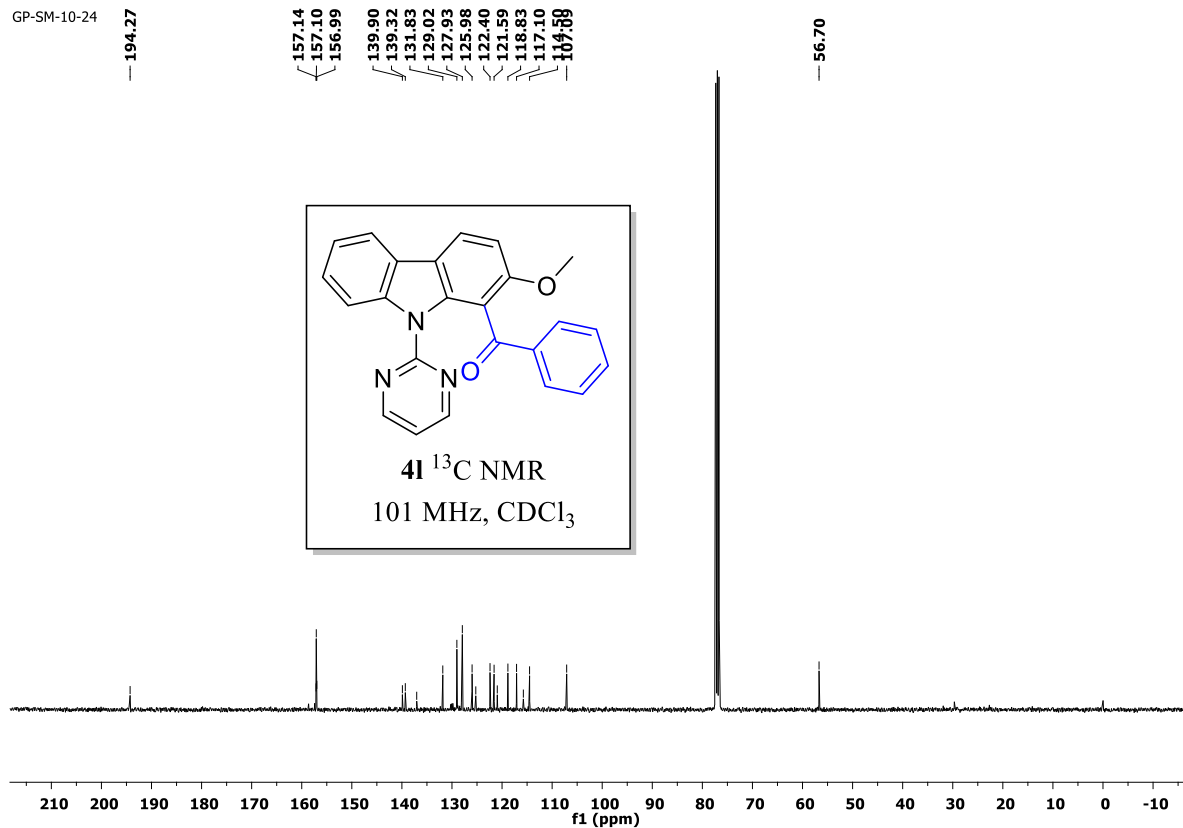

GP-SM-08-212-1

8.45  
8.44  
8.43  
8.41  
8.39  
8.37  
7.75  
7.74  
7.73  
7.72  
7.56  
7.54  
7.45  
7.38  
7.37  
7.35  
7.33  
6.96  
6.86  
6.86

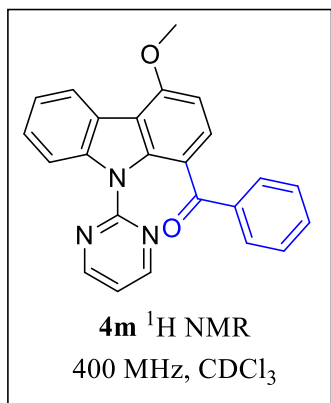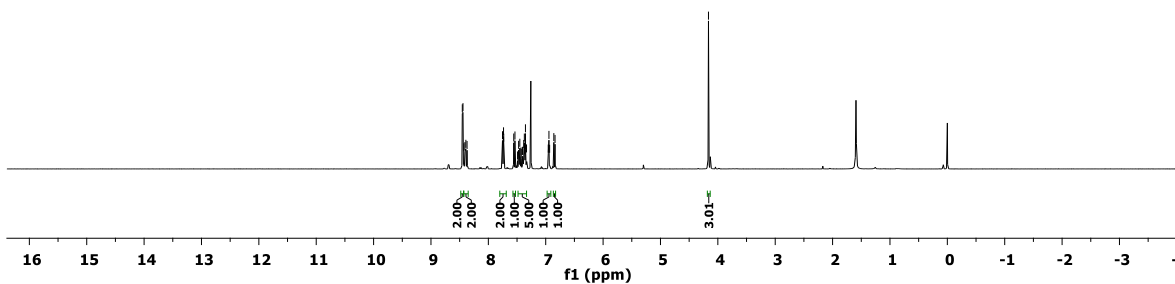

GP-SM-08-212-1

158.47  
158.20  
157.73  
139.44  
138.30  
138.03  
132.08  
129.82  
129.70  
128.05  
126.15  
124.15  
123.00  
122.49  
117.51  
113.17

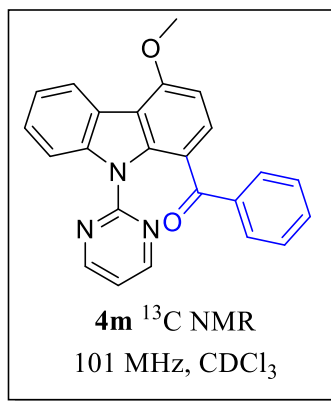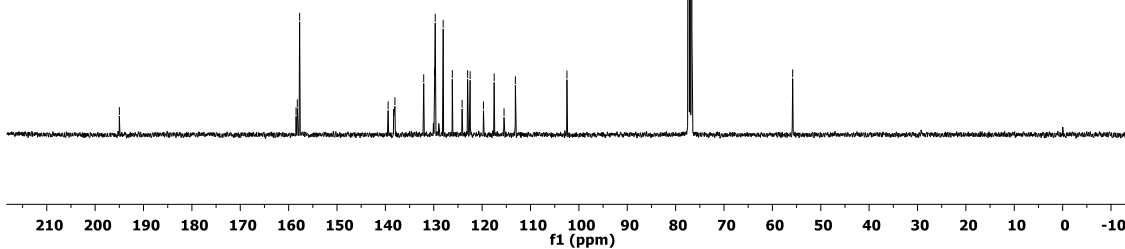

GP-PM-14

8.177  
8.174  
8.158  
8.155  
7.994  
7.992  
7.767  
7.752  
7.732  
7.357  
7.338  
7.297  
7.294  
7.278  
7.275  
7.260 CDCl<sub>3</sub>  
7.134  
6.943  
6.938  
6.923  
6.508  
6.486

— 2.572

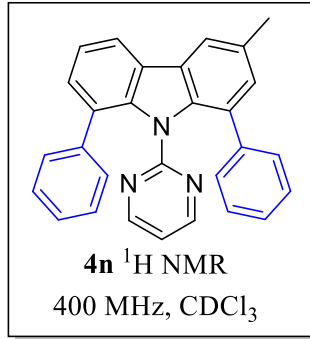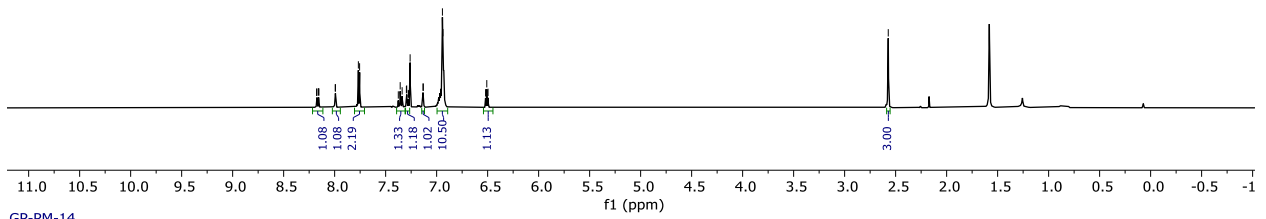

GP-PM-14

157.662  
156.448  
140.542  
137.620  
135.784  
130.805  
130.094  
129.333  
128.443  
128.420  
127.669  
126.948  
126.923  
126.642  
125.706  
125.196  
124.948  
119.421  
118.752  
118.007

— 77.160 CDCl<sub>3</sub>

— 21.356

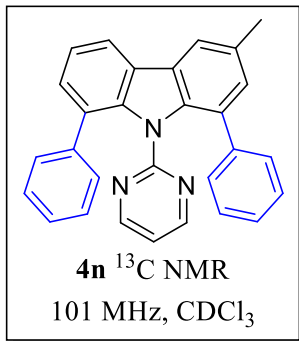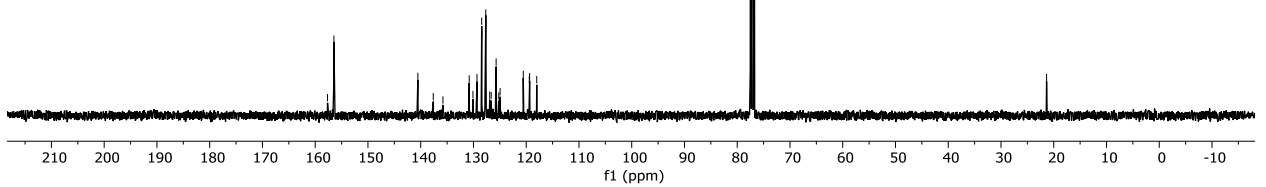



8.031  
7.750  
7.738  
7.260 CDCl<sub>3</sub>  
7.022  
7.001  
6.931  
6.923  
6.914  
6.910  
6.895  
6.891  
6.888  
6.884  
6.879  
6.443  
6.431  
6.418

— 3.748

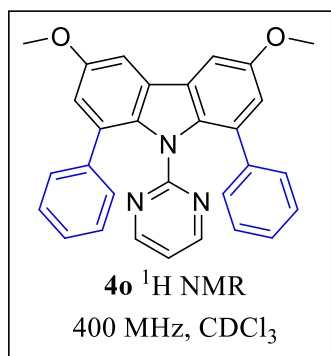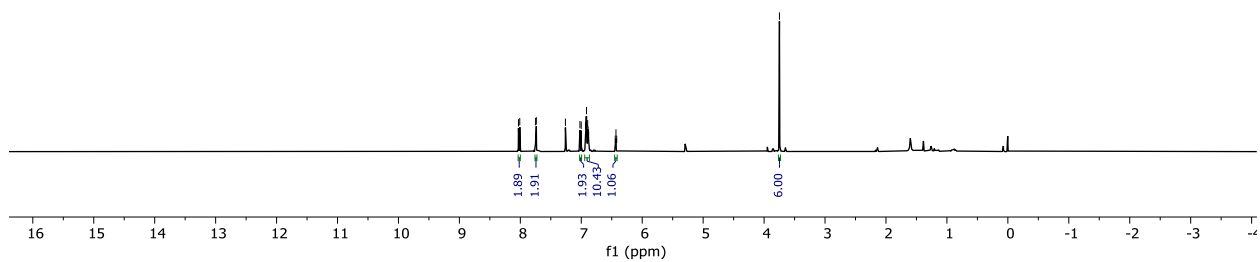

157.714  
156.750  
155.943

139.768  
135.085  
130.473  
127.440  
125.809

119.208  
118.922  
118.187  
115.339

— 105.941

— 77.160 CDCl<sub>3</sub>

— 56.967

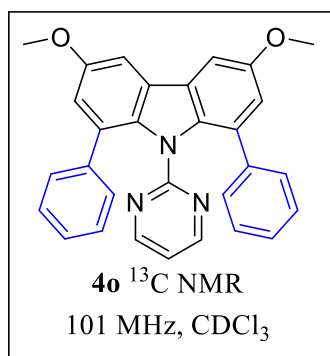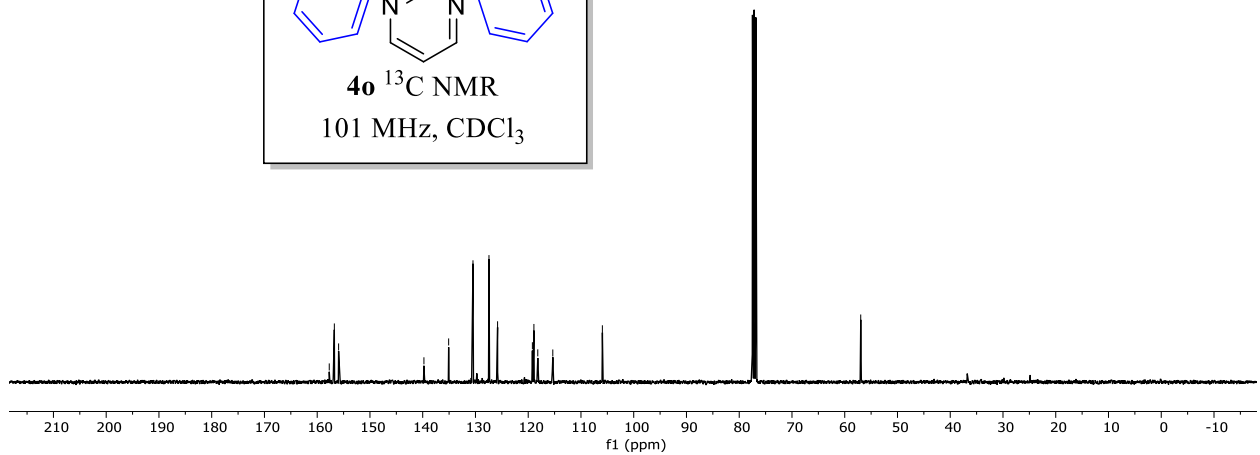

GP-SM-09-14

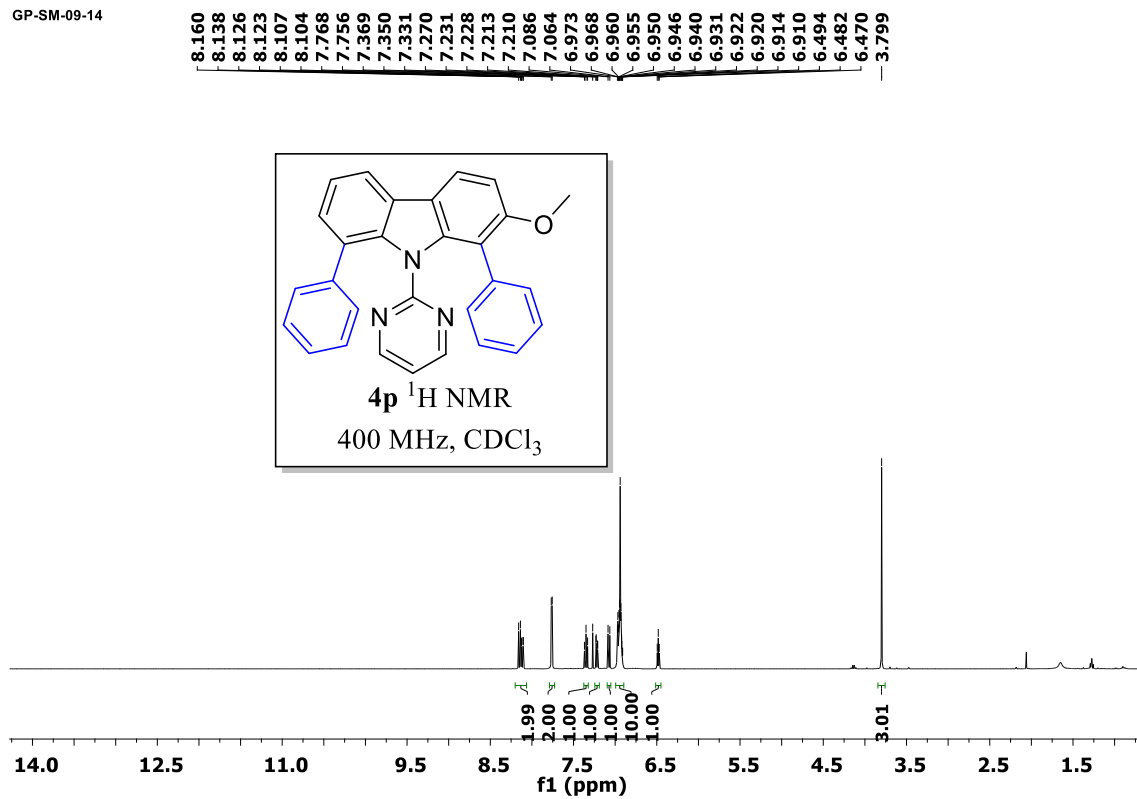

GP-SM-09-14

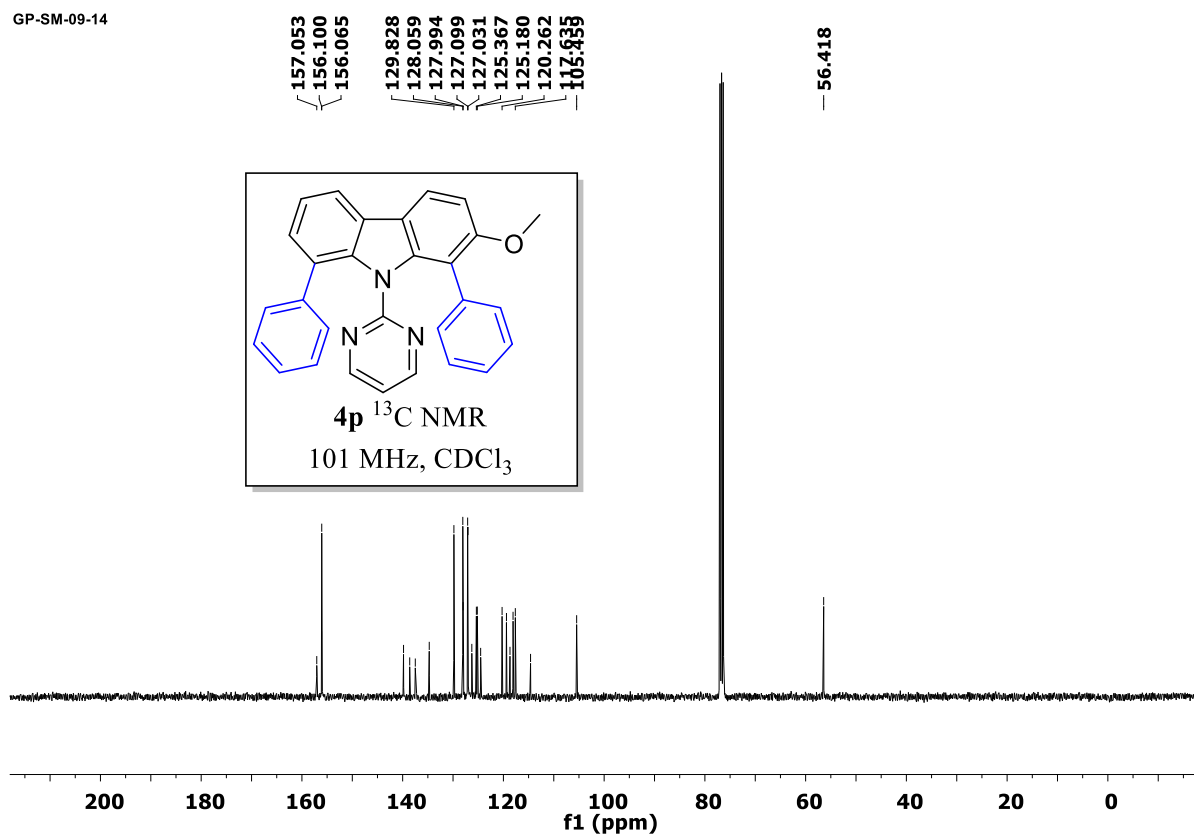

GP-PM-13

8.172  
8.169  
8.153  
8.150  
8.132  
8.112  
8.111  
7.791  
7.779  
7.481  
7.460  
7.400  
7.381  
7.362  
7.288  
7.285  
7.270  
7.266  
7.008  
7.004  
6.988  
6.929  
6.923  
6.507  
6.483  
5.298

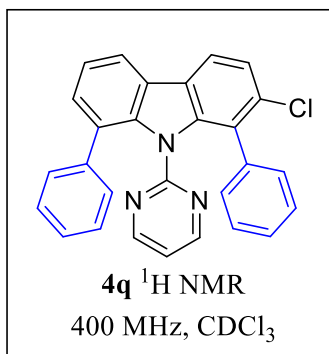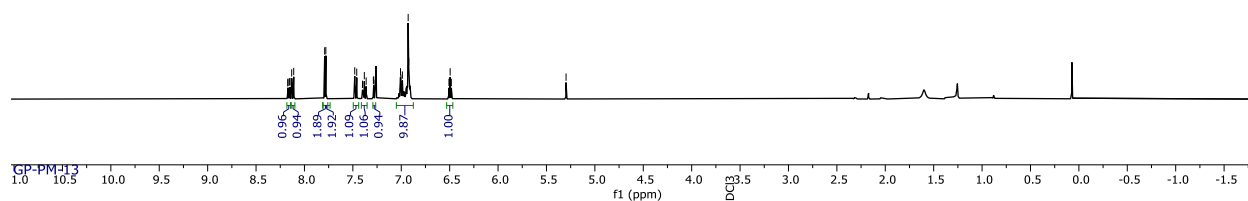

GP-PM-13  
1.0 10.5 10.0 9.5 9.0 8.5 8.0 7.5 7.0 6.5 6.0 5.5 5.0 4.5 4.0 3.5 3.0 2.5 2.0 1.5 1.0 0.5 0.0 -0.5 -1.0 -1.5  
f1 (ppm)

157.362  
156.813  
139.785  
138.842  
138.226  
136.358  
132.463  
130.204  
129.704  
128.674  
127.680  
127.621  
126.679  
126.896  
125.042  
124.248  
123.650  
122.312  
121.136  
120.126  
119.317  
118.466  
77.160 CDCl<sub>3</sub>

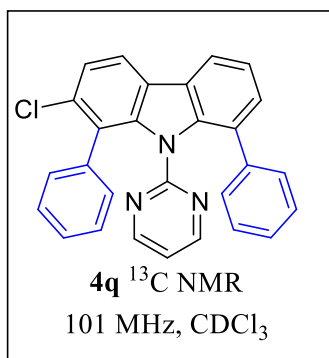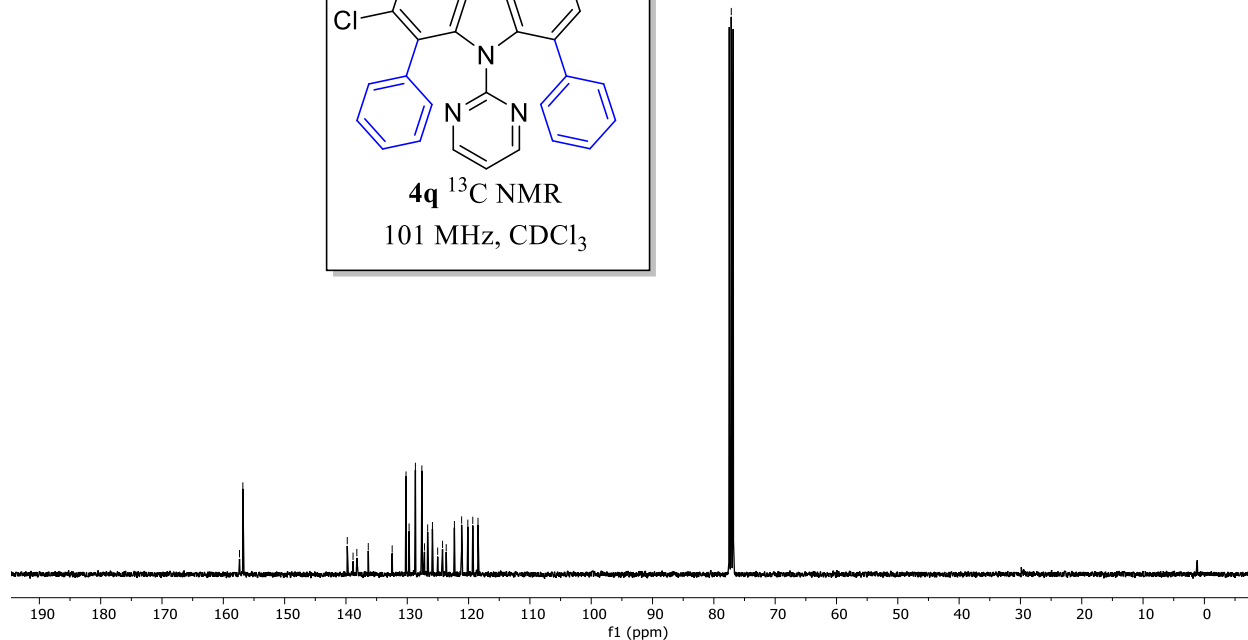

8.184  
8.172  
8.165  
8.158  
8.068  
8.045  
7.797  
7.785  
7.667  
7.647  
7.398  
7.380  
7.360  
7.294  
7.291  
7.276  
7.273  
7.050  
7.047  
7.043  
7.039  
7.029  
7.027  
7.020  
7.016  
7.012  
7.008  
7.004  
6.997  
6.994  
6.990  
6.978  
6.974  
6.972  
6.968  
6.964  
6.958  
6.950  
6.946  
6.943  
6.940  
6.937  
6.929  
6.925  
6.921  
6.915  
6.912  
6.907  
6.901  
6.896  
6.891  
6.498  
6.486

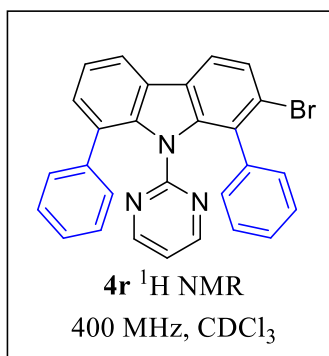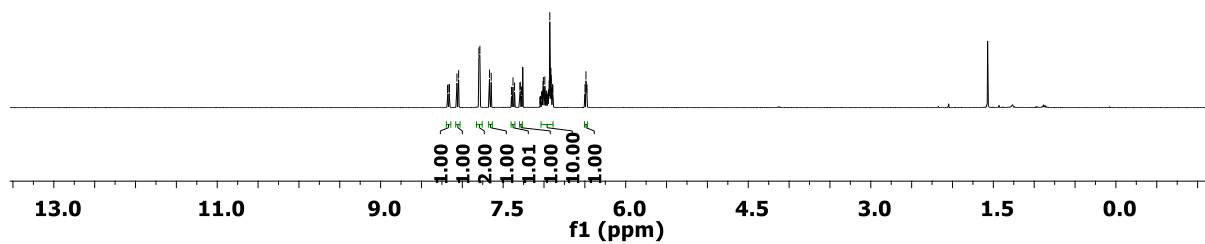

GP-SM-08-102

157.311  
156.740  
139.582  
138.787  
138.153  
138.041  
130.126  
129.713  
128.593  
127.524  
127.479  
127.078  
126.717  
126.616  
125.786  
125.183  
124.113  
124.067  
123.085  
121.022  
120.364  
119.233  
118.356

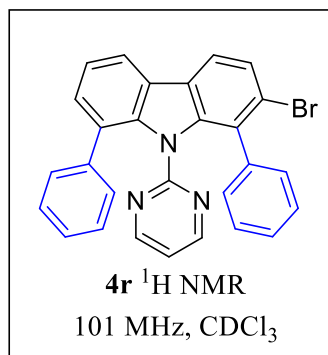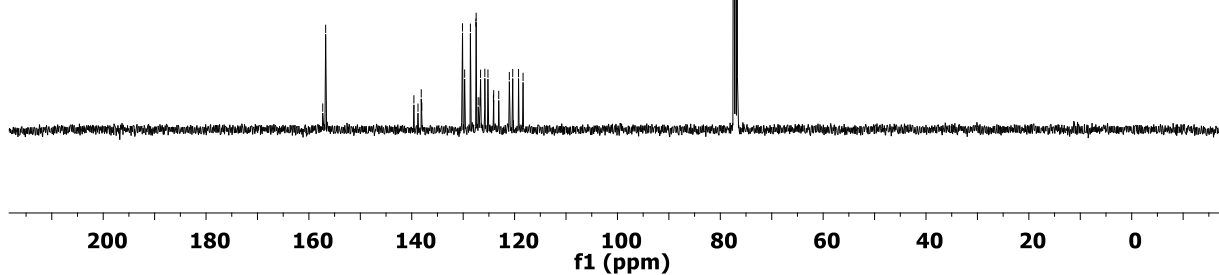

gp-sm-7-15d

8.219  
8.216  
8.212  
8.197  
7.781  
7.489  
7.383  
7.364  
7.317  
7.313  
7.298  
7.295  
7.260  
7.260 CDCl<sub>3</sub>  
6.985  
6.977  
6.968  
6.964  
6.958  
6.955  
6.946  
6.938  
6.935

1.558

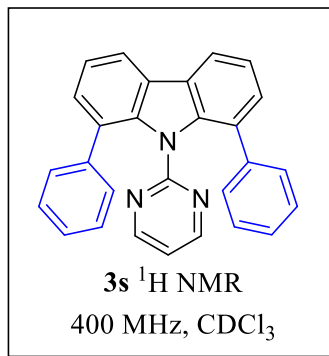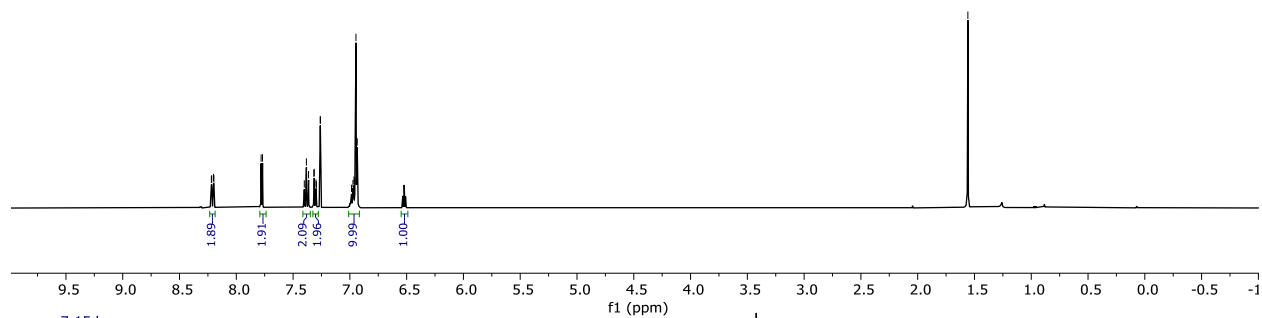

gp-sm-7-15d

157.295  
156.335  
140.306  
137.233  
129.361  
128.307  
127.531  
126.826  
125.890  
124.871  
124.715  
119.727  
118.004

77.318 CDCl<sub>3</sub>  
76.683 CDCl<sub>3</sub>

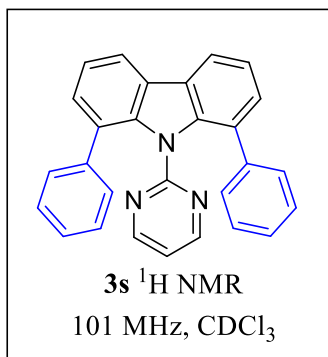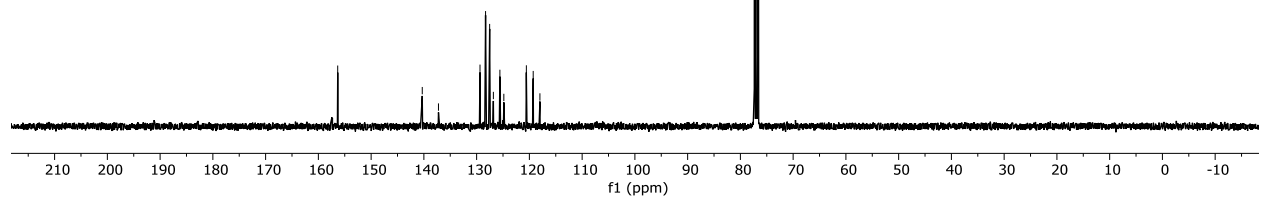

GP-SM-7-56

8.205  
8.202  
8.186  
7.905  
7.893  
7.362  
7.343  
7.260 CDCl<sub>3</sub>  
7.258  
7.243  
6.909  
6.904  
6.896  
6.888  
6.880  
6.875  
6.670  
6.665  
6.659  
6.643  
6.621

— 1.574

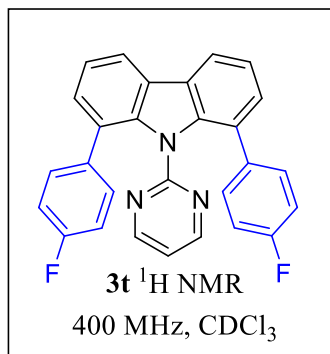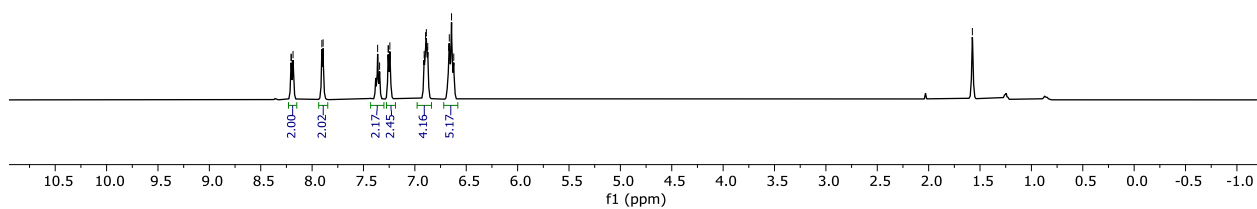

GP-SM-7-56

162.473  
160.031  
157.855  
156.782  
137.604  
136.343  
136.311  
130.108  
130.029  
129.588  
125.860  
124.986  
120.661  
119.891  
118.372  
114.604  
114.393

— 77.160 CDCl<sub>3</sub>

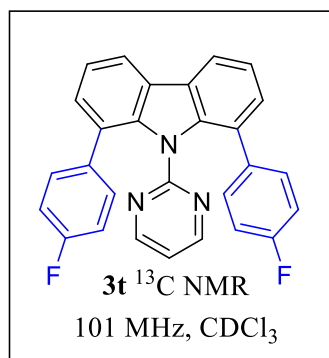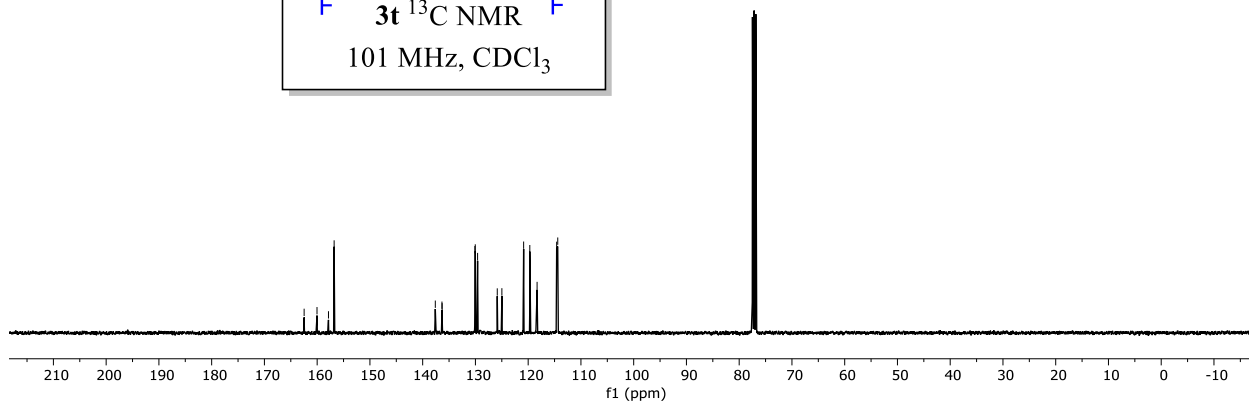

S78

GP-SM-10-10

8.23  
8.21  
8.11  
8.09  
7.99  
7.41  
7.39  
7.37  
7.30  
7.28  
7.28  
7.05  
7.04  
7.03  
7.02  
7.00  
6.98  
6.96  
6.94  
6.93  
6.93  
6.92  
6.88  
6.87  
6.86  
6.69  
6.68  
6.67

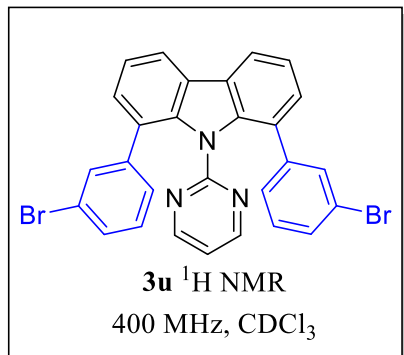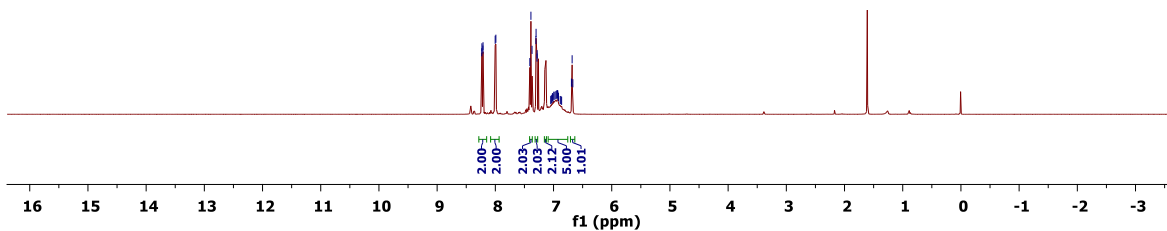

GP-PM-480

157.515  
156.865  
142.248  
137.099  
131.797  
129.430  
129.382  
129.198  
127.385  
126.350  
125.320  
121.792  
120.903  
120.079  
119.073

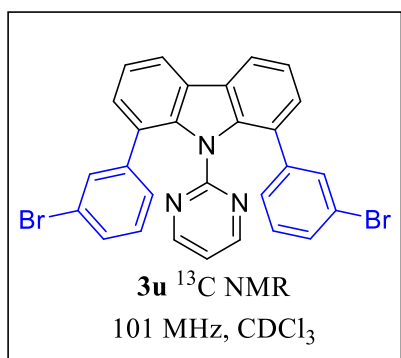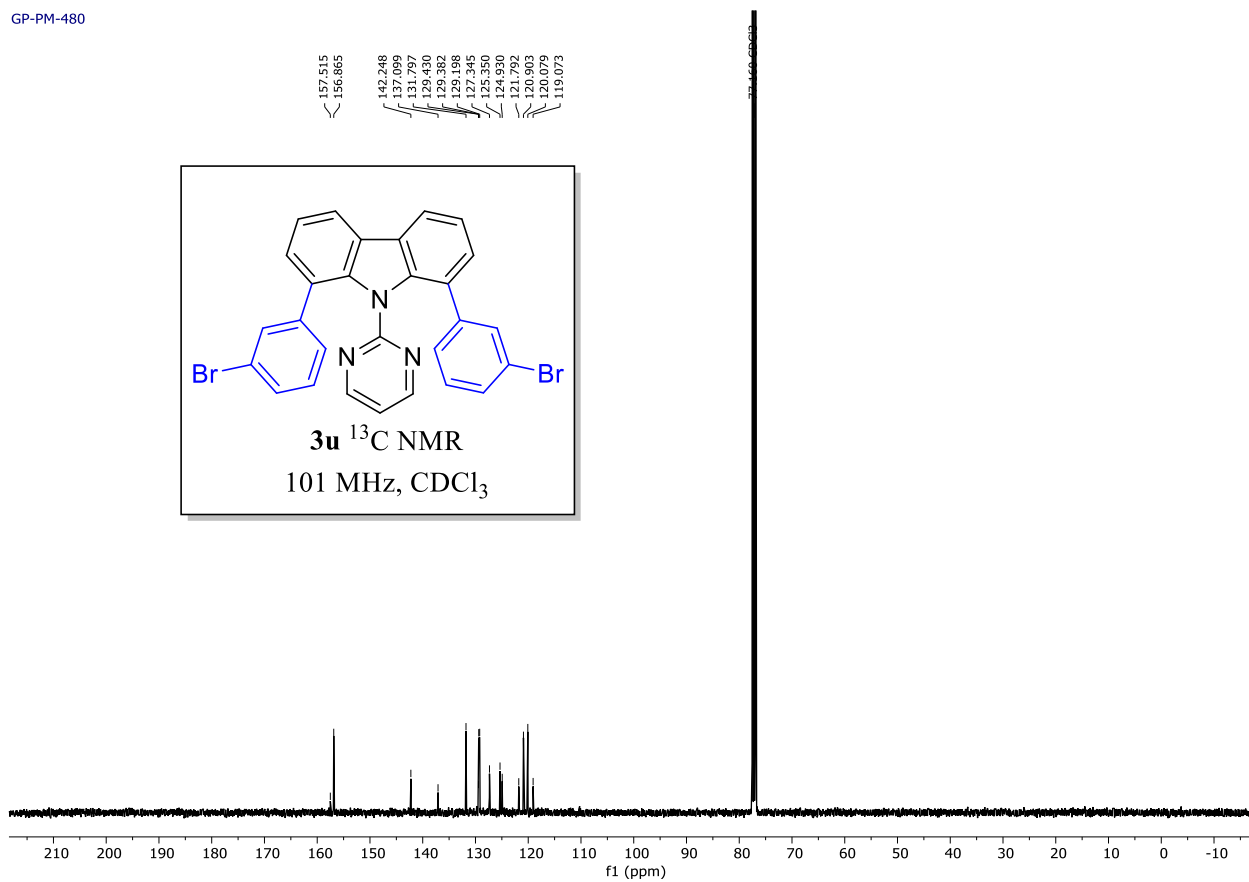

GP-SM-7-147

8.191  
8.172  
7.880  
7.868  
7.398  
7.359  
7.340  
7.284  
7.266  
7.260 CDCl<sub>3</sub>  
6.870  
6.849  
6.622  
6.610  
6.596  
6.580  
6.489

— 3.717

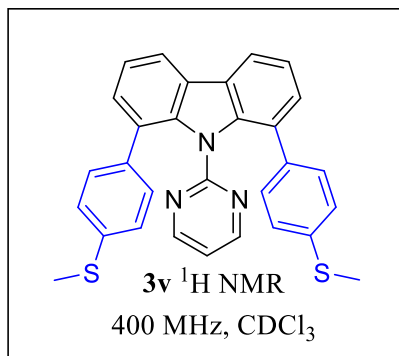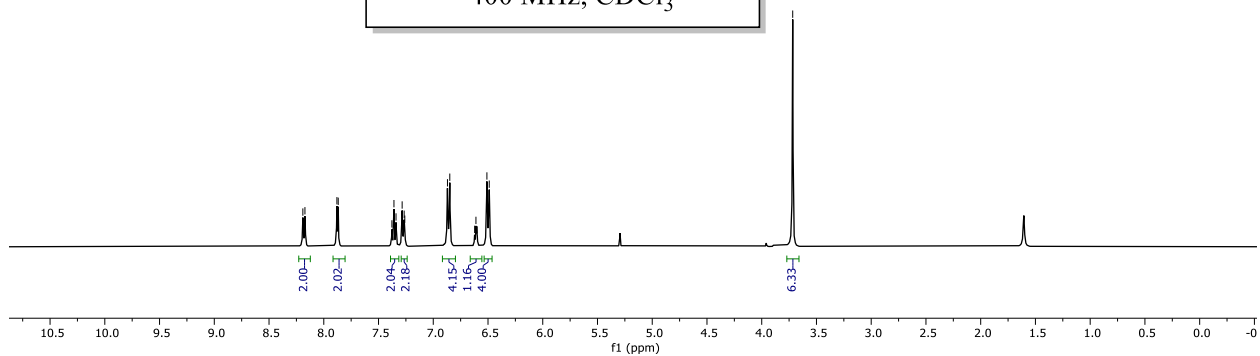

GP-SM-7-147

157.950  
157.779  
156.475  
137.718  
132.964  
129.583  
129.519  
126.635  
125.974  
120.704  
119.215  
117.951  
113.251

— 77.160 CDCl<sub>3</sub>

— 55.459

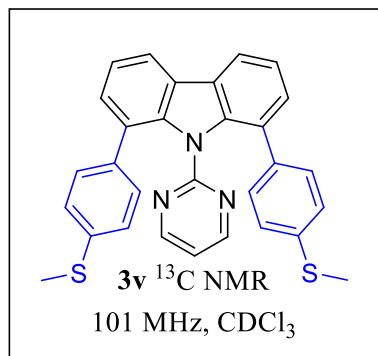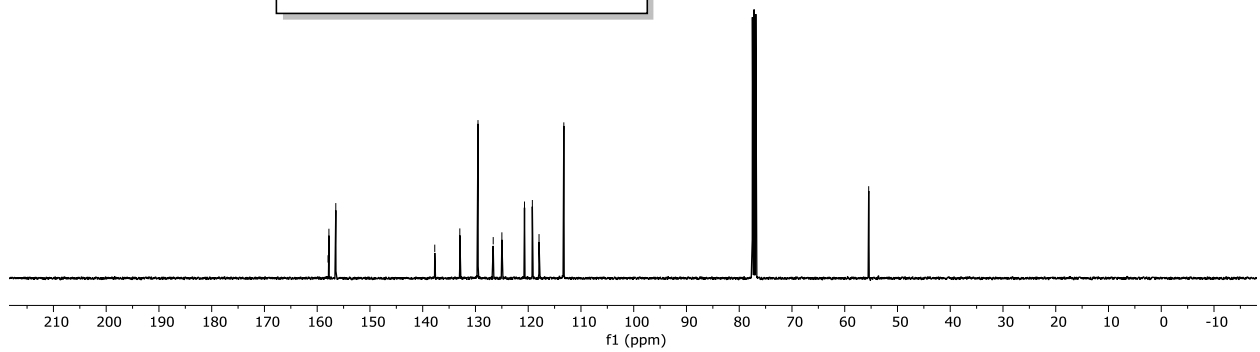

S80



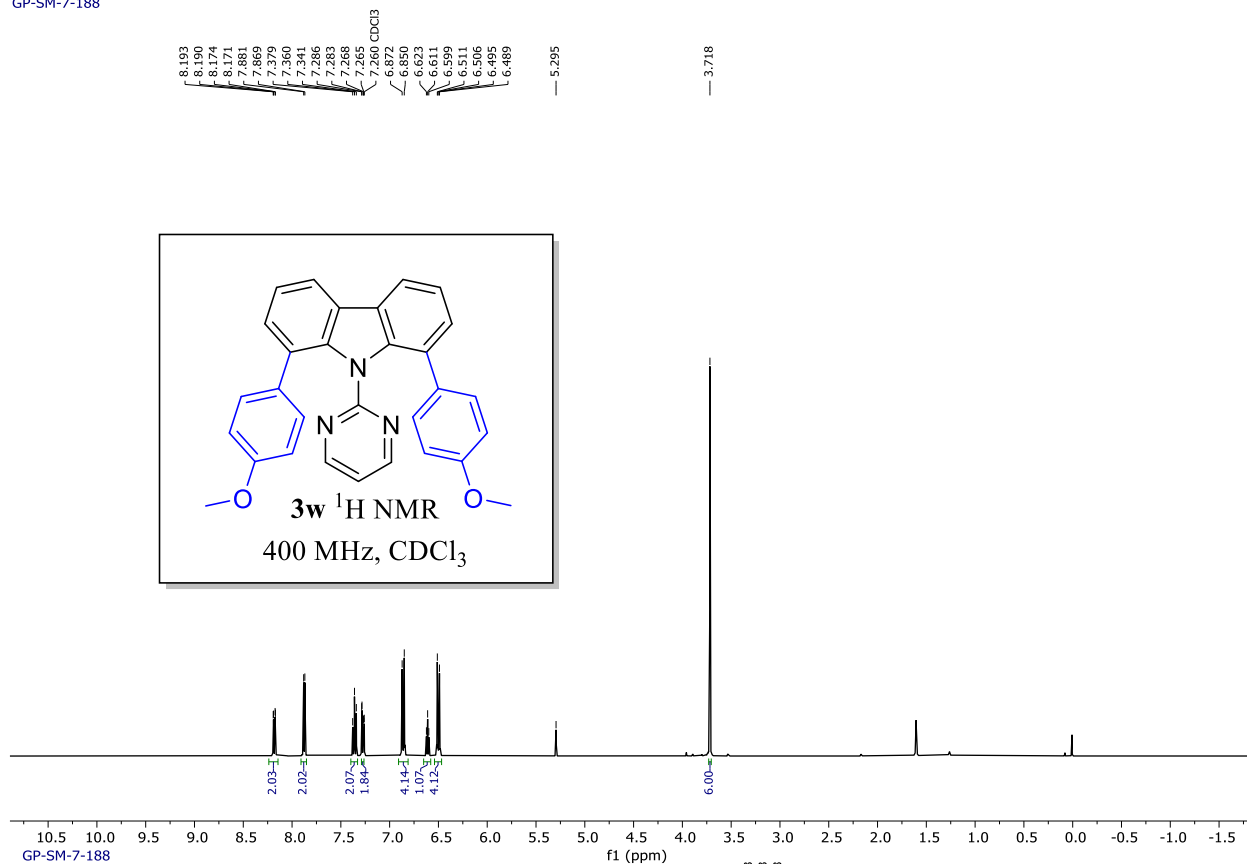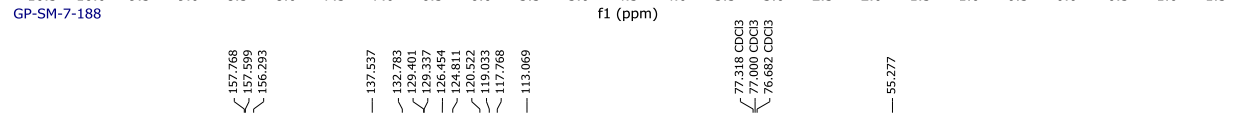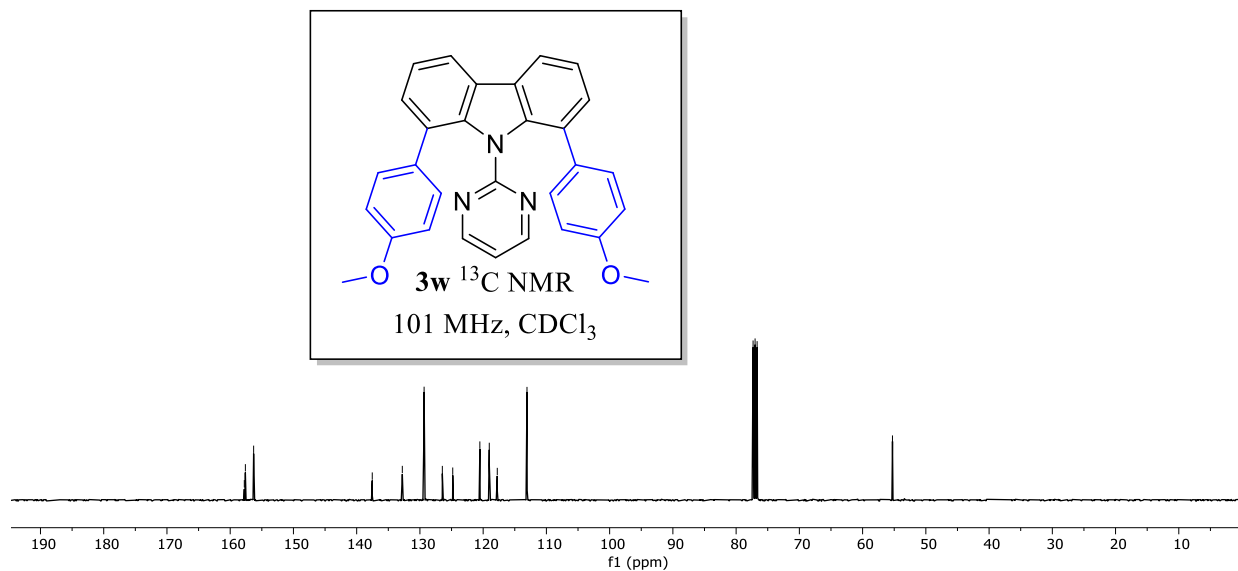

GP-SM-05-110

8.770  
8.759  
8.716  
8.694

7.903  
7.898  
7.898  
7.858  
7.858

7.350  
7.334  
7.328  
7.275  
7.271  
7.255  
7.251  
7.184  
7.079  
7.067  
7.055

3.910  
3.893  
3.875  
3.857  
3.607

1.565  
1.547

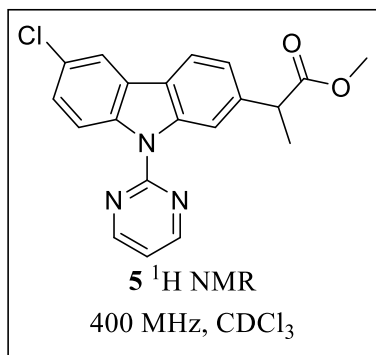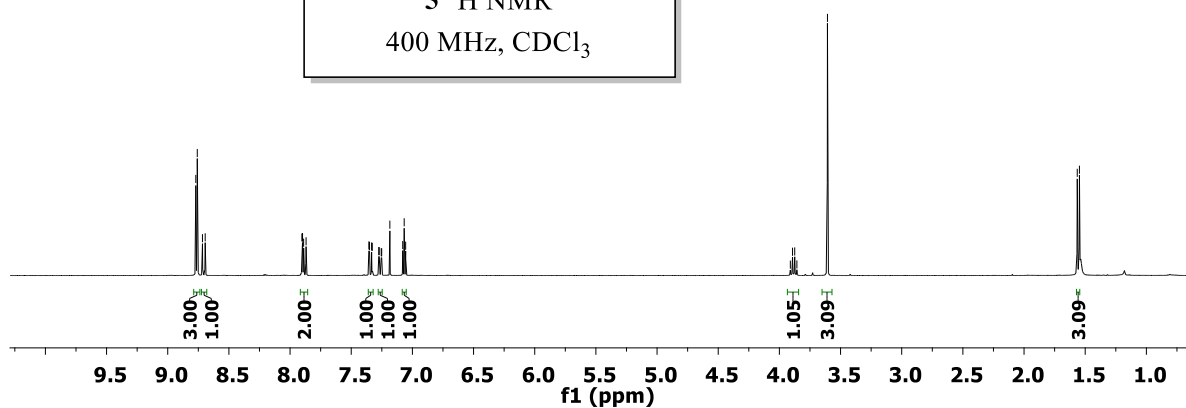

GP-SM-05-110

175.175

158.913  
157.941

140.075  
139.821  
137.748  
127.825  
126.915  
126.424  
123.858  
121.967  
119.827  
119.159  
117.604  
116.243  
115.812

52.107  
46.185

19.056

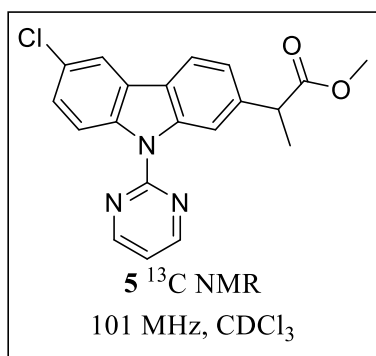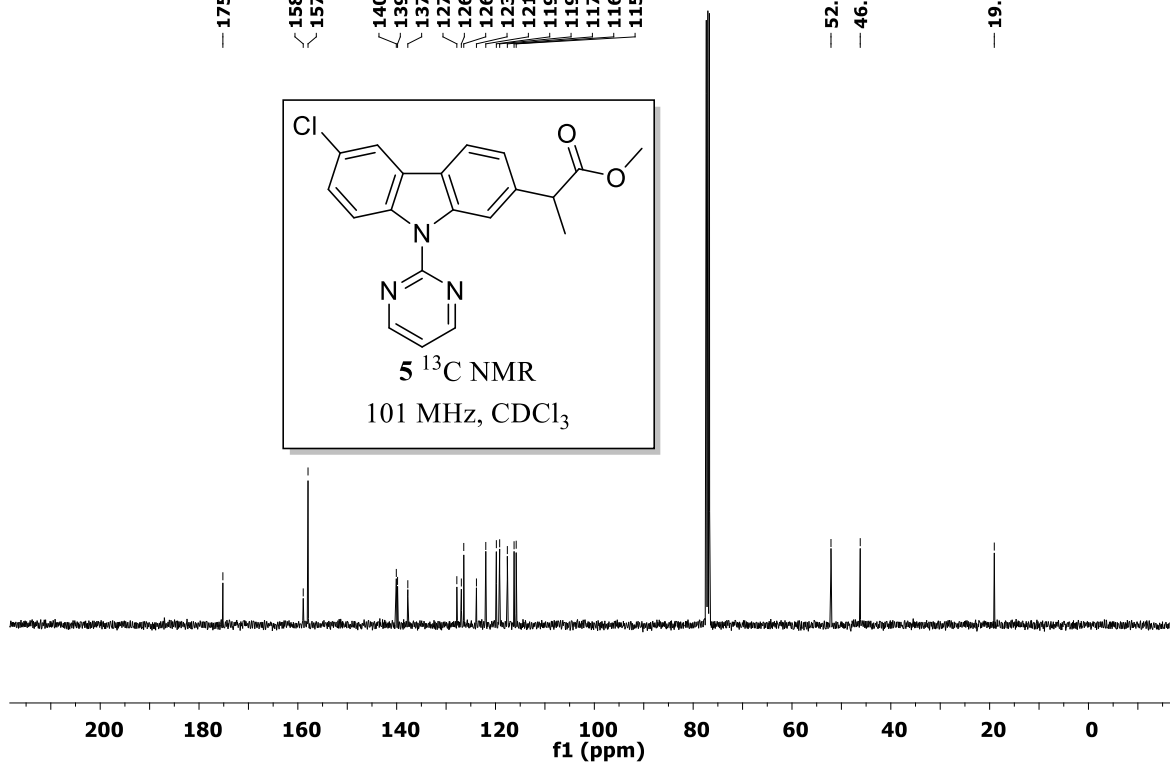

GP-SM-08-11

8.321  
8.309  
8.064  
8.035  
8.030  
8.006  
7.447  
7.442  
7.346  
7.344  
7.326  
7.231  
7.223  
7.214  
7.208  
7.100  
7.091  
7.084  
3.897  
3.879  
3.861  
3.654  
1.588  
1.571

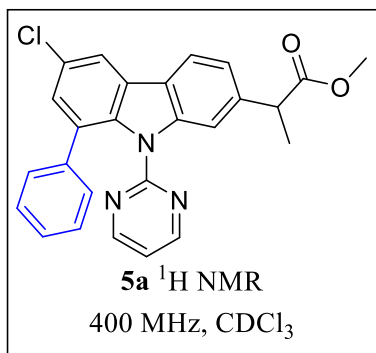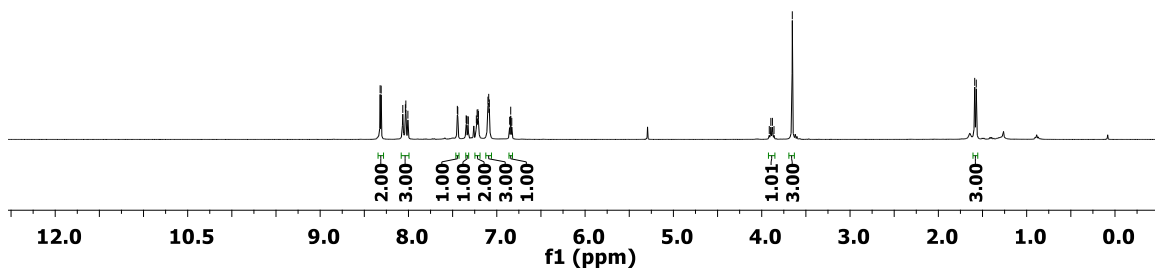

GP-SM-08-11

175.044  
157.329  
157.063  
141.481  
140.228  
139.999  
135.721  
129.724  
128.176  
128.094  
127.835  
127.712  
127.404  
126.600  
123.225  
121.774  
120.425  
118.667  
117.224  
111.495  
52.137  
46.065  
19.018

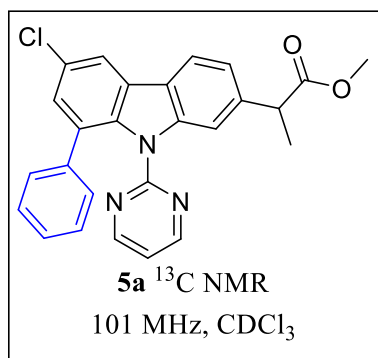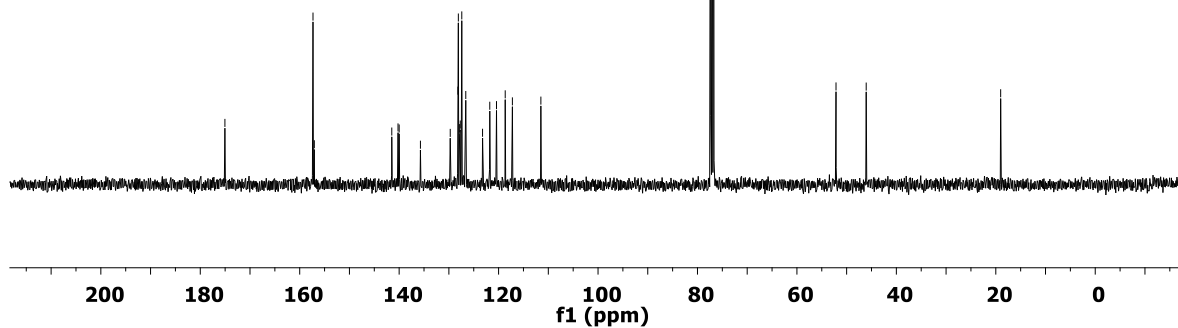

GP-SS-2-147-1

8.11  
8.10  
8.09  
8.08  
8.03  
8.03  
8.02  
6.87  
6.85

3.94

2.27

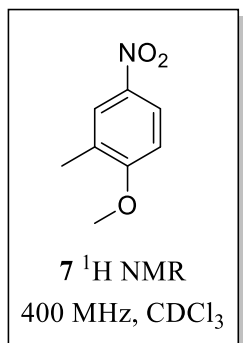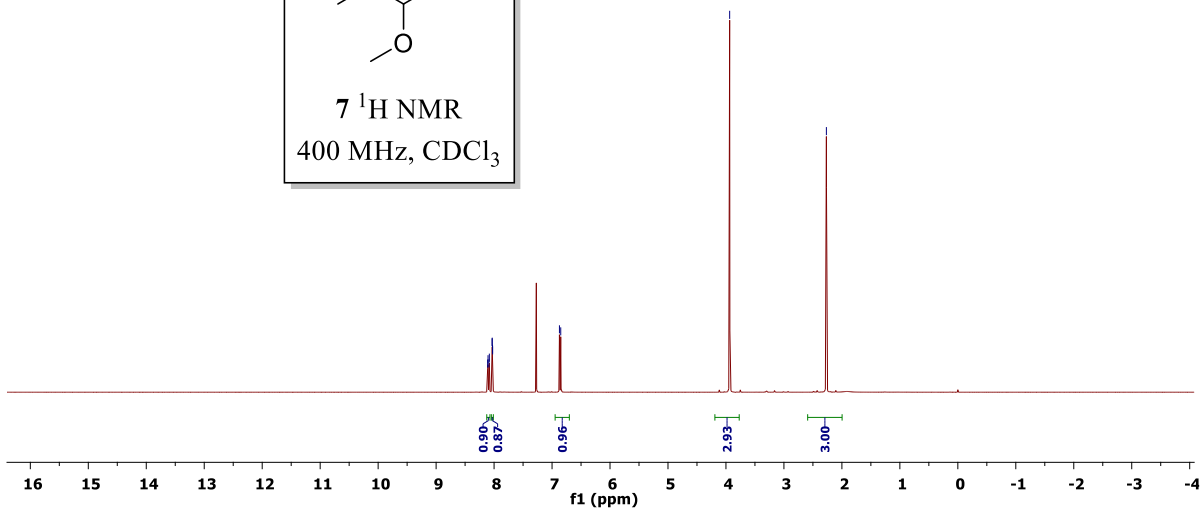

GP-SS-2-147-1.53.1.1r

162.78

140.91

127.77

125.88

123.56

109.16

55.94

16.23

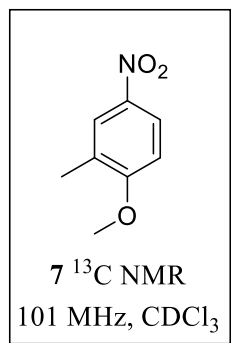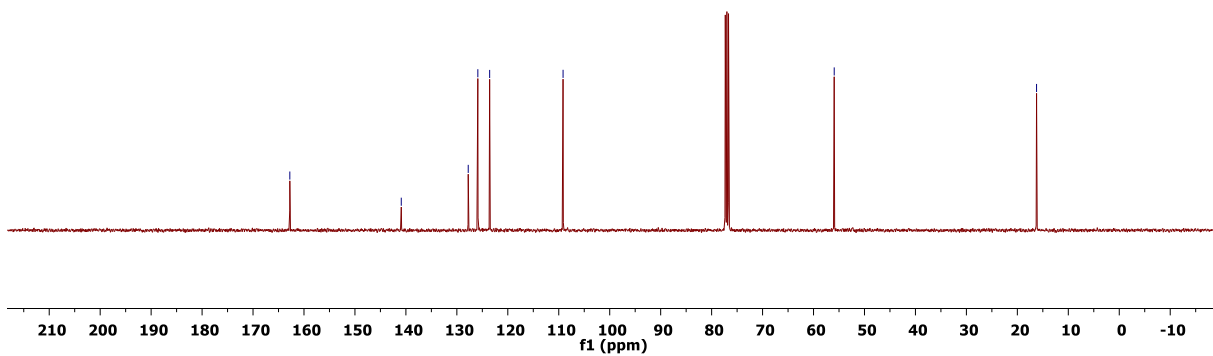

GP-SS-148-1

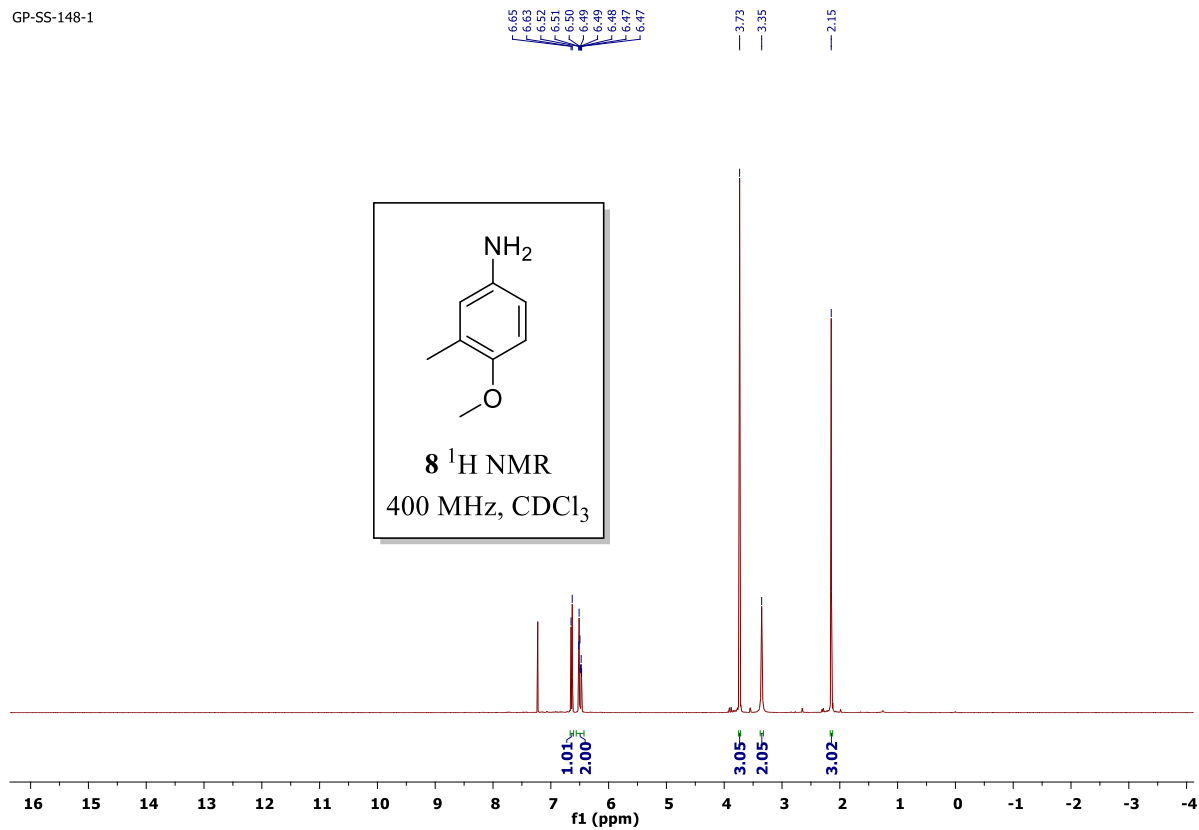

GP-SS-148-1.43.1.1r

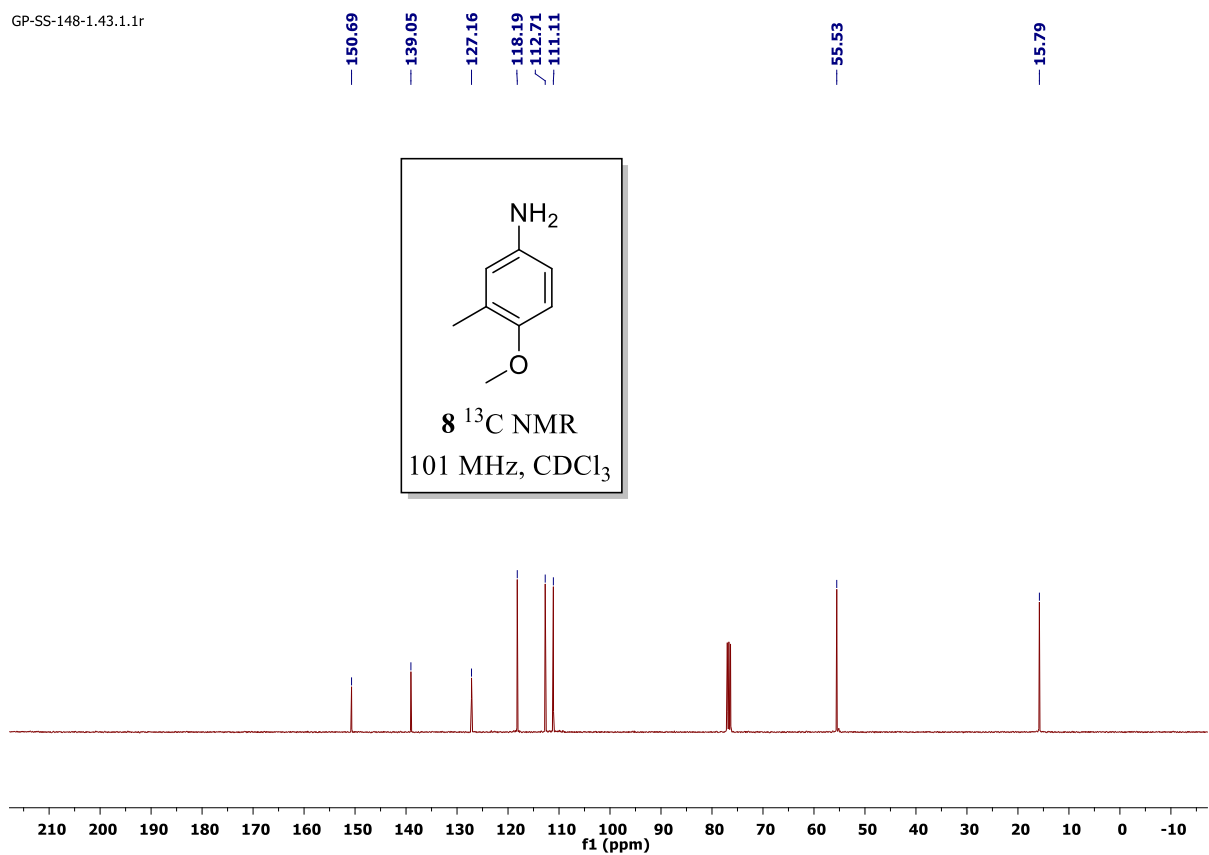

GP-SM-08-89

8.38  
8.37  
7.39  
7.38  
7.37  
7.36  
7.28  
7.27  
7.16  
6.83  
6.81  
6.67  
6.65  
6.64

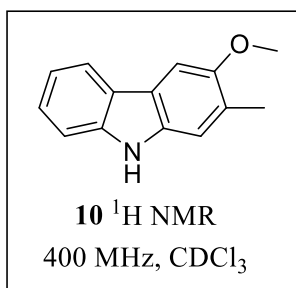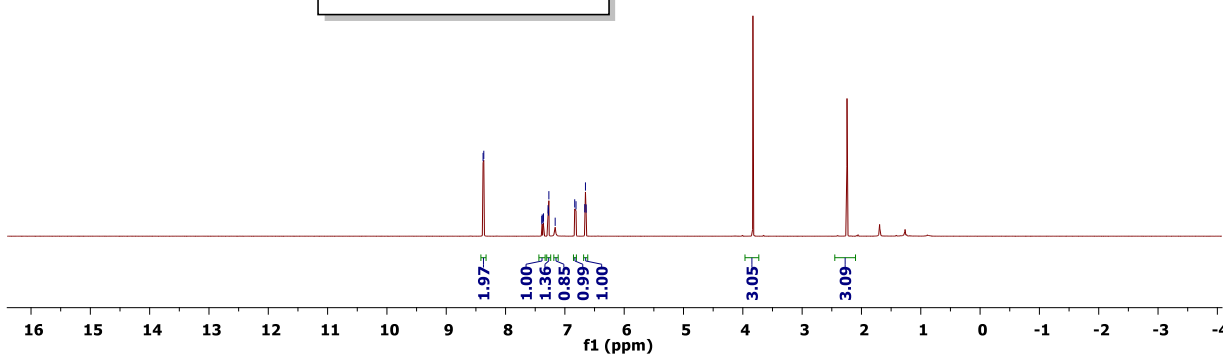

GP-SH-1-A

152.75  
140.04  
134.36  
126.72  
125.33  
123.88  
121.59  
120.06  
119.18  
117.82  
110.96  
101.25  
56.25  
17.61

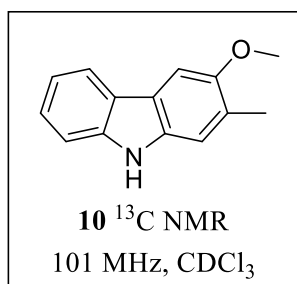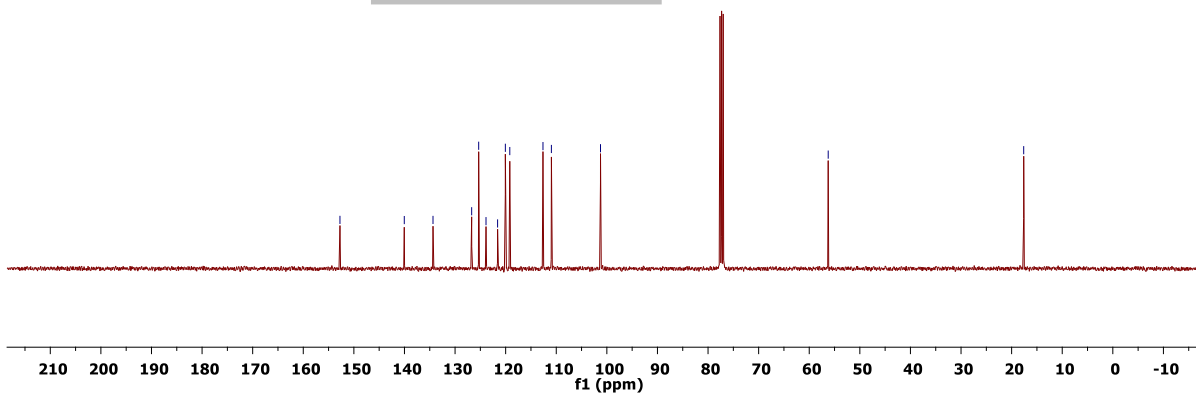

GP-SM-Ag

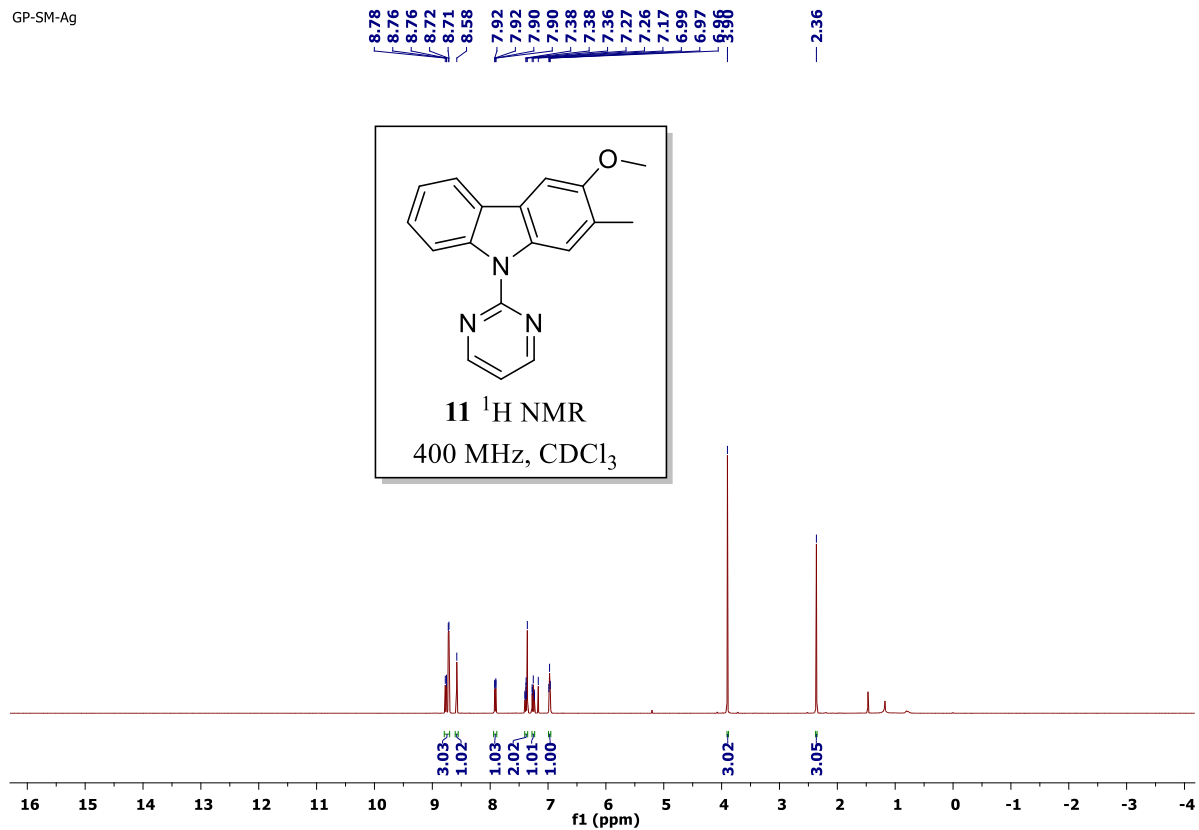

GP-SM-09-141

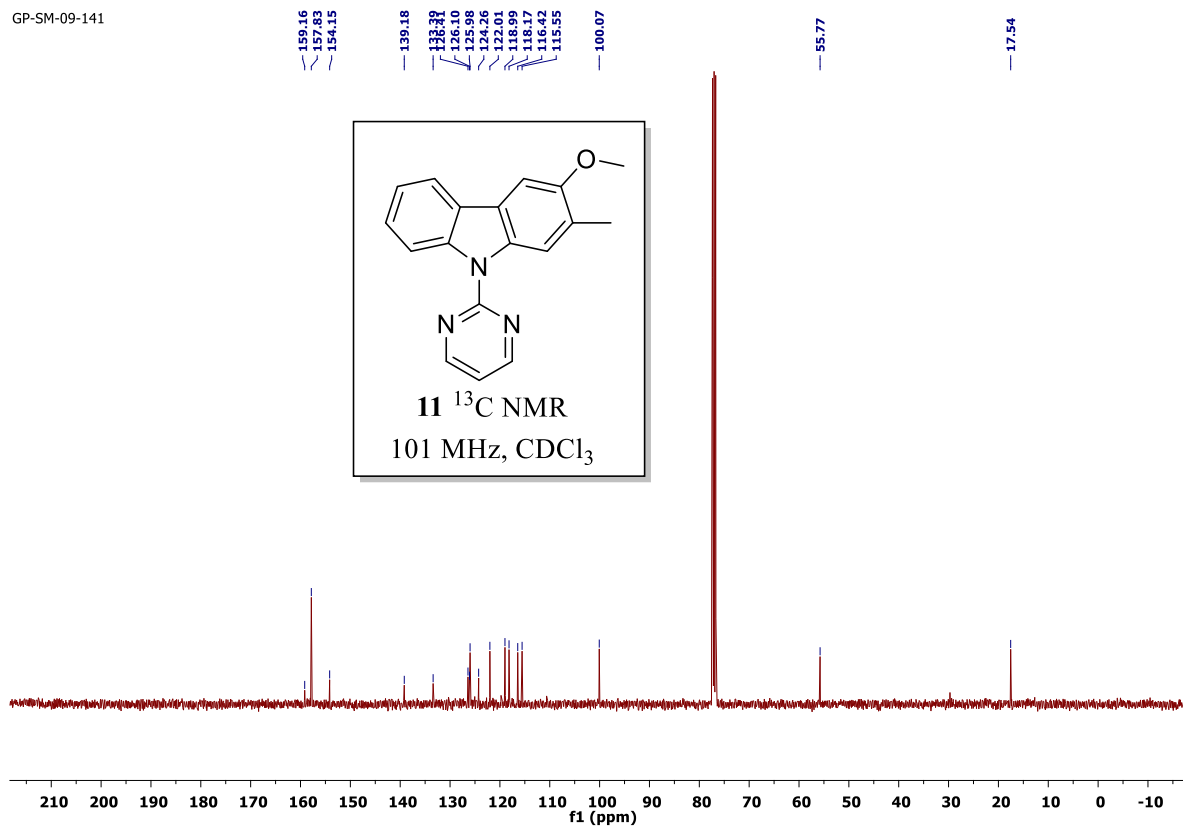

GP-SM-08-131

8.227  
8.215  
7.969  
7.963  
7.953  
7.947  
7.867  
7.866  
7.428  
7.362  
7.360  
7.356  
7.344  
7.209  
7.204  
7.199  
7.046  
7.039  
7.034  
7.032  
7.024  
7.020  
7.016  
7.011  
7.006  
7.001  
6.999  
6.992  
6.989  
6.734  
6.722  
6.710  
3.922

2.310

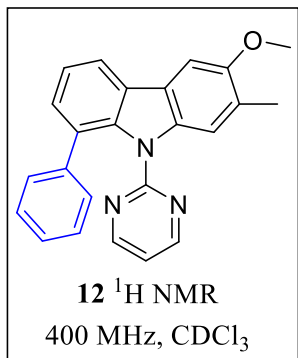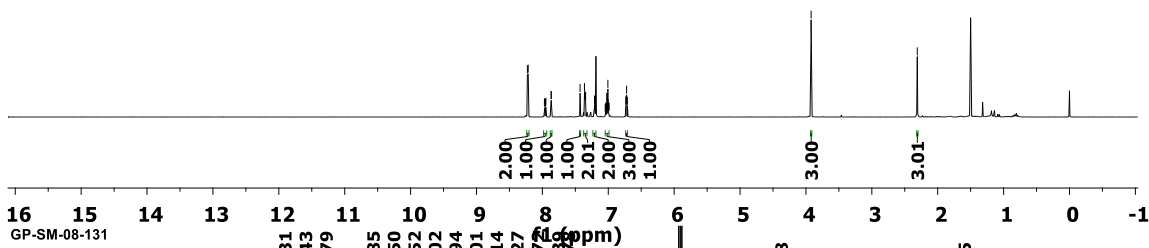

GP-SM-08-131

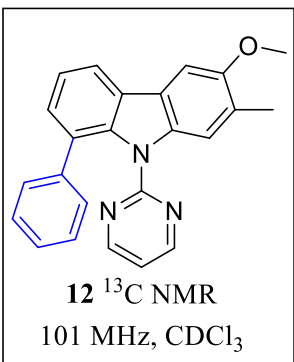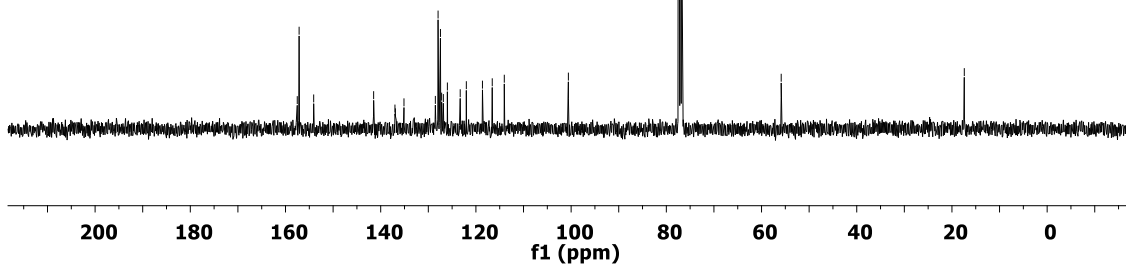



GP-2  
 8.062  
 8.061  
 8.049  
 8.045  
 7.695  
 7.683  
 7.572  
 7.254  
 7.235  
 7.187  
 7.152  
 7.149  
 7.133  
 6.906  
 6.901  
 6.893  
 6.888  
 6.878  
 6.875  
 6.866  
 6.861  
 6.857  
 6.854  
 6.843  
 6.793  
 6.789  
 6.781  
 6.769  
 6.385  
 6.373  
 6.361

1.936

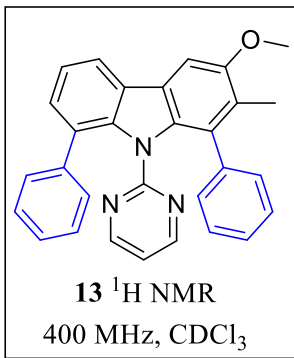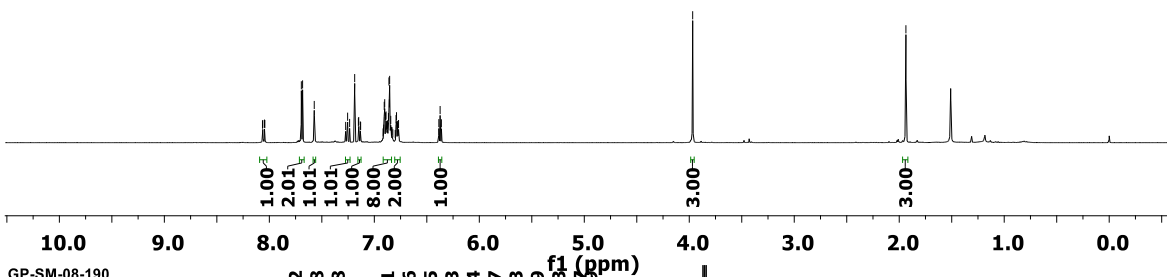

GP-SM-08-190

157.912  
 156.538  
 152.998  
 129.911  
 128.666  
 128.565  
 127.623  
 127.394  
 125.917  
 125.553  
 120.149  
 118.733  
 106.806  
 56.079  
 13.868

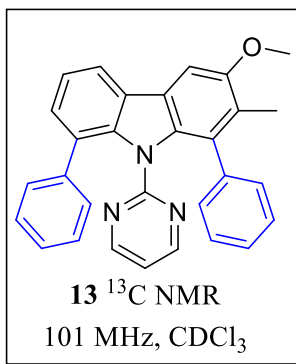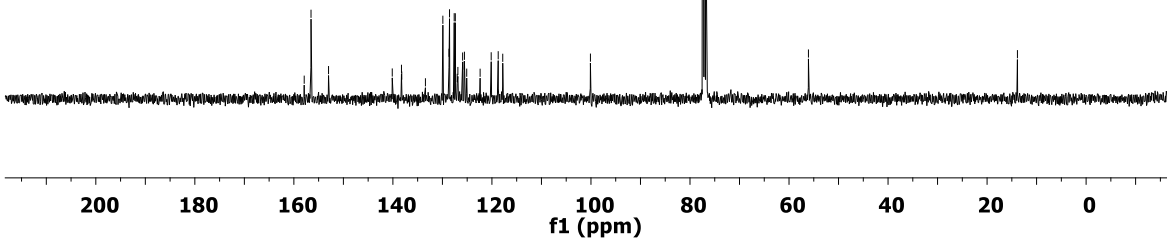

8.328  
8.132  
8.130  
8.112  
8.110  
8.098  
8.096  
8.079  
8.077  
7.717  
7.714  
7.709  
7.696  
7.693  
7.689  
7.585  
7.580  
7.566  
7.551  
7.547  
7.470  
7.467  
7.463  
7.460  
7.457  
7.453  
7.448  
7.442  
7.439  
7.430  
7.428  
7.427  
7.424  
7.418  
7.416  
7.354  
7.335  
7.316  
7.278  
7.270  
7.266  
7.250  
7.247  
7.238

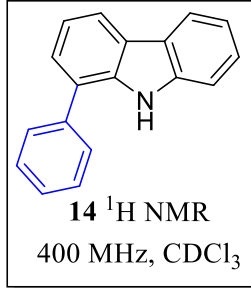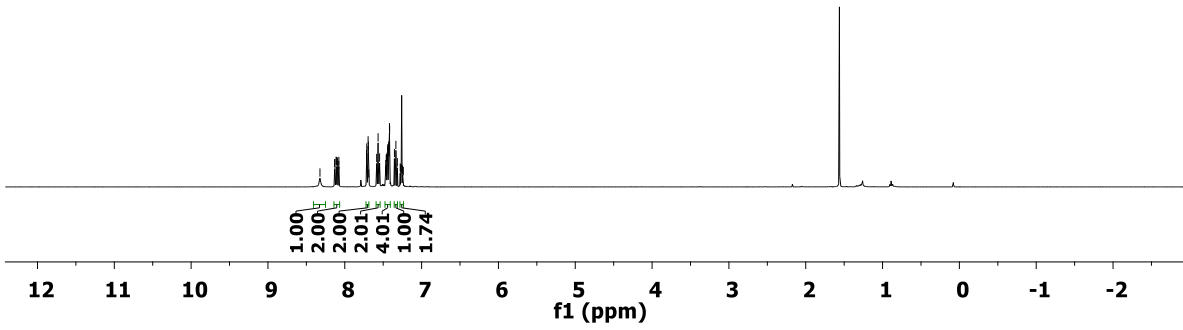

GP-SM-08-88

139.475  
139.078  
137.266  
129.286  
128.402  
127.577  
125.975  
125.757  
125.051  
123.701  
123.555  
120.487  
119.924  
119.566  
119.504  
110.689

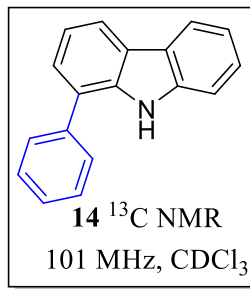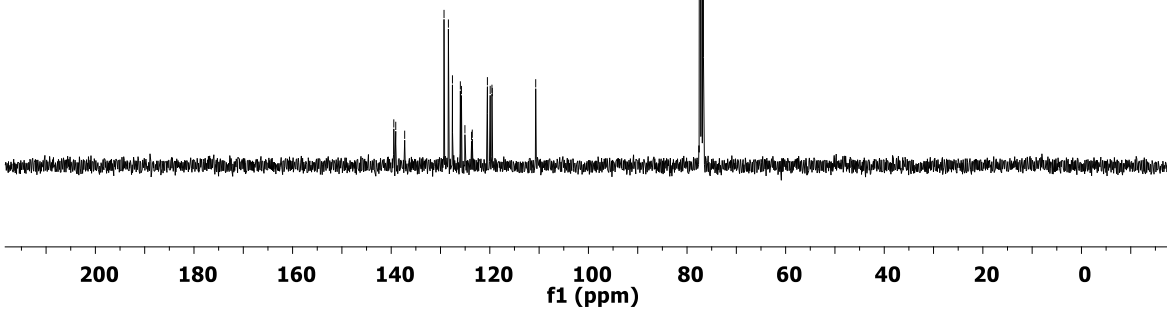

Supplement: d3ob01827j1.pdf [file d3ob01827j1.pdf]
